# Supplementary material
Source: HighWire-hosted journal article supplement (https://gut.bmj.com/content/gutjnl-2019-318362)
Supplement: inline-supplementary-material-3 [file inline-supplementary-material-3.xlsx]

## Sheet: 1.5fold
ID	GeneName	FC	FC(AVE)	GeneDescription	KO_1	KO_2	KO_3	KO_4	WT_1	WT_2	WT_3	FC(AVE)	log2FoldChange	pvalue	padj	Chrom	Strand	Start	End	GeneLength	GeneType	GeneDescription
ENSMUSG00000036169	Sostdc1	0.0696394	0.0161522	sclerostin_domain_containing_1	0.72897	6.83646	1.17478	2.16042	177.063	192.645	136.443	0.0161522	-3.84395	6.46e-49	3.94e-45	chr12	+	36314169	36318452	1751	protein_coding	sclerostin_domain_containing_1
ENSMUSG00000017344	Vtn	0.0935252	0.062407	vitronectin	23.327	30.3843	23.4956	30.2458	392.278	378.11	520.964	0.062407	-3.4185	1.2e-63	1.46e-59	chr11	+	78499091	78502324	2030	protein_coding	vitronectin
ENSMUSG00000030827	Fgf21	0.134442	0.0633176	fibroblast_growth_factor_21	7.2897	3.03843	11.7478	8.64167	102.716	148.372	112.763	0.0633176	-2.89494	1.12e-29	2.72e-26	chr7	-	45613907	45615490	930	protein_coding	fibroblast_growth_factor_21
ENSMUSG00000038843	Gcnt1	0.161263	0.0430927	glucosaminyl_(N-acetyl)_transferase_1_core_2	3.64485	1.51921	3.52434	1.08021	63.5863	46.6655	59.7643	0.0430927	-2.63252	5.23e-21	7.96e-18	chr19	-	17326141	17356667	5571	protein_coding	glucosaminyl_(N-acetyl)_transferase_1_core_2
ENSMUSG00000034416	Pkd1l2	0.195763	0.0306466	polycystic_kidney_disease_1_like_2	0	3.79803	1.17478	0	44.9995	39.4862	37.2117	0.0306466	-2.35282	4.27e-16	4.73e-13	chr8	-	116995679	117082449	8301	protein_coding	polycystic_kidney_disease_1_like_2
ENSMUSG00000021684	Pde8b	0.217227	0.0918371	phosphodiesterase_8B	5.10279	4.55764	5.8739	3.24063	51.8473	58.631	42.8499	0.0918371	-2.20273	1.13e-15	1.06e-12	chr13	-	95024454	95250336	5879	protein_coding	phosphodiesterase_8B
ENSMUSG00000025089	Gfra1	0.230093	0.0233594	glial_cell_line_derived_neurotrophic_factor_family_receptor_alpha_1	1.45794	0	1.17478	0	25.4345	27.5207	31.5736	0.0233594	-2.11971	3.45e-13	2.47e-10	chr19	-	58235604	58455909	5476	protein_coding	glial_cell_line_derived_neurotrophic_factor_family_receptor_alpha_1
ENSMUSG00000075702	Selm	0.272674	0.212589	selenoprotein_M	27.7009	24.3074	36.4182	23.7646	135.977	125.638	134.188	0.212589	-1.87475	3.85e-18	4.69e-15	chr11	+	3514684	3517351	1481	protein_coding	selenoprotein_M
ENSMUSG00000063428	Ddo	0.301578	0.147581	D-aspartate_oxidase	8.01867	3.79803	4.69912	8.64167	32.2823	53.8448	41.7223	0.147581	-1.7294	6.2e-10	3.28e-07	chr10	+	40630011	40649931	3000	protein_coding	D-aspartate_oxidase
ENSMUSG00000029335	Bmp3	0.31405	0.242371	bone_morphogenetic_protein_3	37.9064	41.0187	45.8164	33.4865	127.173	223.755	138.698	0.242371	-1.67093	1.09e-13	9.01e-11	chr5	+	98854415	98884396	7398	protein_coding	bone_morphogenetic_protein_3
ENSMUSG00000030762	Aqp8	0.325194	0.157477	aquaporin_8	3.64485	9.87488	30.5443	8.64167	67.4993	112.476	71.0406	0.157477	-1.62063	1.29e-08	5.25e-06	chr7	+	123462291	123468004	1581	protein_coding	aquaporin_8
ENSMUSG00000019970	Sgk1	0.327116	0.206664	serum/glucocorticoid_regulated_kinase_1	189.532	60.0089	45.8164	91.8177	505.756	343.41	555.921	0.206664	-1.61213	1.15e-09	5.82e-07	chr10	+	21882184	21999903	4903	protein_coding	serum/glucocorticoid_regulated_kinase_1
ENSMUSG00000049313	Sorl1	0.359284	0.254691	sortilin-related_receptor_LDLR_class_A_repeats-containing	21.8691	18.9902	18.7965	11.8823	89.0208	56.2379	65.4025	0.254691	-1.4768	4.09e-09	1.72e-06	chr9	-	41964720	42124297	11321	protein_coding	sortilin-related_receptor_LDLR_class_A_repeats-containing
ENSMUSG00000022871	Fetub	0.363402	0.0650711	fetuin_beta	1.45794	0.759606	2.34956	1.08021	6.84775	32.3069	25.9355	0.0650711	-1.46036	3.82e-07	0.000103288	chr16	+	22918382	22939766	1913	protein_coding	fetuin_beta
ENSMUSG00000034768	Asb16	0.394485	0.212675	ankyrin_repeat_and_SOCS_box-containing_16	7.2897	6.83646	3.52434	9.72188	22.4998	32.3069	41.7223	0.212675	-1.34196	2.29e-06	0.000556872	chr11	+	102268743	102279462	2843	protein_coding	ankyrin_repeat_and_SOCS_box-containing_16
ENSMUSG00000026110	Mgat4a	0.412409	0.351658	mannoside_acetylglucosaminyltransferase_4_isoenzyme_A	51.0279	54.6917	71.6616	87.4969	151.629	205.807	207.484	0.351658	-1.27785	2.05e-09	9.61e-07	chr1	-	37439340	37541016	12881	protein_coding	mannoside_acetylglucosaminyltransferase_4_isoenzyme_A
ENSMUSG00000039899	Fgl2	0.414451	0.331062	fibrinogen-like_protein_2	80.9157	142.806	249.053	199.839	476.408	544.431	502.922	0.331062	-1.27073	7.88e-08	2.67e-05	chr5	+	21372642	21378374	3788	protein_coding	fibrinogen-like_protein_2
ENSMUSG00000006204	5430419D17Rik	0.420127	0.234443	RIKEN_cDNA_5430419D17_gene	4.37382	3.79803	9.39824	7.56146	22.4998	26.3241	31.5736	0.234443	-1.2511	1.26e-05	0.00222329	chr7	+	131174402	131250945	3146	protein_coding	RIKEN_cDNA_5430419D17_gene
ENSMUSG00000061353	Cxcl12	0.423344	0.339253	chemokine_(C-X-C_motif)_ligand_12	28.4298	39.4995	29.3695	30.2458	117.39	96.9207	67.6577	0.339253	-1.2401	1.27e-07	3.97e-05	chr6	+	117168535	117181367	8176	protein_coding	chemokine_(C-X-C_motif)_ligand_12
ENSMUSG00000045838	A430105I19Rik	0.42374	0.254852	RIKEN_cDNA_A430105I19_gene	15.3084	3.03843	10.573	11.8823	45.9778	33.5034	40.5946	0.254852	-1.23875	1.1e-05	0.00206141	chr2	-	118754158	118762661	4779	protein_coding	RIKEN_cDNA_A430105I19_gene
ENSMUSG00000029304	Spp1	0.424484	0.334949	secreted_phosphoprotein_1	50.2989	101.787	49.3407	65.8927	146.738	268.028	183.803	0.334949	-1.23622	2.26e-07	6.39e-05	chr5	+	104435118	104441050	1648	protein_coding	secreted_phosphoprotein_1
ENSMUSG00000039661	Dusp26	0.427091	0.340756	dual_specificity_phosphatase_26_(putative)	161.102	66.0857	81.0598	89.6573	369.779	229.738	276.269	0.340756	-1.22738	2.23e-07	6.39e-05	chr8	+	31089471	31097047	2305	protein_coding	dual_specificity_phosphatase_26_(putative)
ENSMUSG00000030513	Pcsk6	0.4413	0.333336	proprotein_convertase_subtilisin/kexin_type_6	36.4485	32.6631	19.9713	15.1229	70.434	87.3482	76.6788	0.333336	-1.18017	2.17e-06	0.000538299	chr7	+	65861734	66050386	5190	protein_coding	proprotein_convertase_subtilisin/kexin_type_6
ENSMUSG00000026158	Ogfrl1	0.44141	0.328024	opioid_growth_factor_receptor-like_1	29.1588	50.134	48.166	44.2885	62.608	190.252	139.826	0.328024	-1.17981	4.83e-06	0.00108866	chr1	-	23366424	23397772	8109	protein_coding	opioid_growth_factor_receptor-like_1
ENSMUSG00000037053	Azgp1	0.446456	0.300734	alpha-2-glycoprotein_1_zinc	9.47661	14.4325	9.39824	10.8021	35.217	45.469	29.3183	0.300734	-1.16341	1.93e-05	0.0033104	chr5	+	137981520	137990233	1610	protein_coding	alpha-2-glycoprotein_1_zinc
ENSMUSG00000037306	Man1c1	0.452951	0.329057	mannosidase_alpha_class_1C_member_1	19.6822	16.7113	17.6217	9.72188	45.9778	59.8276	39.467	0.329057	-1.14257	1.25e-05	0.00222329	chr4	-	134561690	134704290	5722	protein_coding	mannosidase_alpha_class_1C_member_1
ENSMUSG00000026764	Kif5c	0.454065	0.212048	kinesin_family_member_5C	3.64485	3.03843	7.04868	2.16042	16.6303	21.5379	18.0421	0.212048	-1.13903	9.2e-05	0.0117935	chr2	+	49619298	49774778	7142	protein_coding	kinesin_family_member_5C
ENSMUSG00000034981	Parm1	0.454116	0.39334	prostate_androgen-regulated_mucin-like_protein_1	48.112	69.8838	78.7102	44.2885	156.52	150.765	152.23	0.39334	-1.13887	8.15e-08	2.68e-05	chr5	+	91517615	91626894	5068	protein_coding	prostate_androgen-regulated_mucin-like_protein_1
ENSMUSG00000052560	Cpne8	0.456658	0.335274	copine_VIII	19.6822	20.5094	14.0974	10.8021	48.9125	53.8448	42.8499	0.335274	-1.13081	1.22e-05	0.00222329	chr15	-	90487482	90679432	4164	protein_coding	copine_VIII
ENSMUSG00000030605	Mfge8	0.459957	0.387357	milk_fat_globule-EGF_factor_8_protein	53.2148	57.7301	30.5443	43.2083	121.303	108.886	127.422	0.387357	-1.12043	3.23e-07	8.95e-05	chr7	-	79133768	79149060	4694	protein_coding	milk_fat_globule-EGF_factor_8_protein
ENSMUSG00000036473	Tbc1d24	0.46014	0.334012	TBC1_domain_family_member_24	16.7663	12.1537	18.7965	15.1229	66.521	41.8793	32.7012	0.334012	-1.11985	2.72e-05	0.00448542	chr17	-	24175431	24209387	13362	protein_coding	TBC1_domain_family_member_24
ENSMUSG00000000308	Ckmt1	0.46748	0.344225	creatine_kinase_mitochondrial_1_ubiquitous	9.47661	11.3941	21.146	18.3635	44.0213	51.4517	36.0841	0.344225	-1.09702	4.22e-05	0.00618726	chr2	+	121357714	121363737	2496	protein_coding	creatine_kinase_mitochondrial_1_ubiquitous
ENSMUSG00000043760	Pkhd1	0.474221	0.358451	polycystic_kidney_and_hepatic_disease_1	14.5794	15.9517	17.6217	12.9625	38.1518	50.2552	39.467	0.358451	-1.07637	3.3e-05	0.00502653	chr1	-	20057779	20618064	14310	protein_coding	polycystic_kidney_and_hepatic_disease_1
ENSMUSG00000072944	Nup62cl	0.478593	0.301195	nucleoporin_62_C-terminal_like	5.83176	12.9133	9.39824	10.8021	19.565	32.3069	45.1052	0.301195	-1.06313	0.000176051	0.0200418	chrX	-	140006805	140062712	2234	protein_coding	nucleoporin_62_C-terminal_like
ENSMUSG00000000290	Itgb2	0.488432	0.346295	integrin_beta_2	20.4112	9.87488	11.7478	20.524	64.5645	37.0931	33.8289	0.346295	-1.03377	0.000156595	0.0183412	chr10	+	77530252	77565708	3052	protein_coding	integrin_beta_2
ENSMUSG00000034648	Lrrn1	0.496269	0.425627	leucine_rich_repeat_protein_1_neuronal	53.2148	31.1439	36.4182	46.449	107.608	95.7241	91.3379	0.425627	-1.01081	6.11e-06	0.00128235	chr6	+	107529768	107570214	3700	protein_coding	leucine_rich_repeat_protein_1_neuronal
ENSMUSG00000057836	Xlr3a	0.49684	0.341422	X-linked_lymphocyte-regulated_3A	5.83176	18.2306	11.7478	19.4438	43.043	28.7172	49.6157	0.341422	-1.00915	0.000296937	0.0298925	chrX	-	73086293	73097095	4045	protein_coding	X-linked_lymphocyte-regulated_3A
ENSMUSG00000038059	Smim3	0.498784	0.292612	small_integral_membrane_protein_3	4.37382	6.83646	12.9226	8.64167	46.956	16.7517	20.2973	0.292612	-1.00351	0.000533631	0.0474464	chr18	-	60474193	60501983	1984	protein_coding	small_integral_membrane_protein_3
ENSMUSG00000086010	Gm15318	0.503692	0.087759	predicted_gene_15318	0.72897	1.51921	0	1.08021	9.7825	10.769	7.8934	0.087759	-0.989386	0.000292787	0.0297203	chr17	+	31152752	31163052	1698	antisense	predicted_gene_15318
ENSMUSG00000039007	Cpq	0.507496	0.363671	carboxypeptidase_Q	16.0373	8.35567	10.573	12.9625	31.304	37.0931	30.446	0.363671	-0.978532	0.000339305	0.0336022	chr15	+	33083129	33594552	1923	protein_coding	carboxypeptidase_Q
ENSMUSG00000027834	Serpini1	0.508064	0.448486	serine_(or_cysteine)_peptidase_inhibitor_clade_I_member_1	52.4858	73.6818	93.9824	51.85	146.738	161.534	146.592	0.448486	-0.976918	5.18e-06	0.00112643	chr3	+	75557547	75643495	7286	protein_coding	serine_(or_cysteine)_peptidase_inhibitor_clade_I_member_1
ENSMUSG00000052942	Glis3	0.513755	0.277034	GLIS_family_zinc_finger_3	5.10279	7.59606	5.8739	2.16042	17.6085	22.7345	15.7868	0.277034	-0.960848	0.000953202	0.0725685	chr19	-	28258851	28680077	8842	protein_coding	GLIS_family_zinc_finger_3
ENSMUSG00000031297	Slc7a3	0.51492	0.359467	solute_carrier_family_7_(cationic_amino_acid_transporter_y+_system)_member_3	11.6635	35.7015	10.573	21.6042	40.1083	70.5965	55.2538	0.359467	-0.95758	0.000542617	0.0475512	chrX	-	101079210	101086020	3784	protein_coding	solute_carrier_family_7_(cationic_amino_acid_transporter_y+_system)_member_3
ENSMUSG00000052572	Dlg2	0.518308	0.0726343	discs_large_homolog_2_(Drosophila)	0.72897	0.759606	0	1.08021	12.7173	4.78621	9.02103	0.0726343	-0.948117	0.000371943	0.0362451	chr7	+	91090706	92449247	13213	protein_coding	discs_large_homolog_2_(Drosophila)
ENSMUSG00000075334	Rprm	0.518632	0.112248	reprimo_TP53_dependent_G2_arrest_mediator_candidate	1.45794	2.27882	0	2.16042	23.478	2.3931	13.5315	0.112248	-0.947217	0.00053965	0.0475512	chr2	-	54084093	54085552	1460	protein_coding	reprimo_TP53_dependent_G2_arrest_mediator_candidate
ENSMUSG00000005672	Kit	0.519481	0.377063	kit_oncogene	14.5794	28.865	29.3695	25.925	108.586	56.2379	31.5736	0.377063	-0.944857	0.00060656	0.0516678	chr5	+	75574916	75656722	8911	protein_coding	kit_oncogene
ENSMUSG00000035948	Acss3	0.52198	0.141526	acyl-CoA_synthetase_short-chain_family_member_3	0.72897	1.51921	2.34956	1.08021	6.84775	11.9655	11.2763	0.141526	-0.937935	0.000760355	0.0605352	chr10	-	106936164	107123668	4549	protein_coding	acyl-CoA_synthetase_short-chain_family_member_3
ENSMUSG00000025375	Aatk	0.523041	0.305158	apoptosis-associated_tyrosine_kinase	16.7663	6.07685	3.52434	6.48125	33.2605	21.5379	25.9355	0.305158	-0.935004	0.00122803	0.089573	chr11	-	120007313	120047167	7159	protein_coding	apoptosis-associated_tyrosine_kinase
ENSMUSG00000018411	Mapt	0.528355	0.422386	microtubule-associated_protein_tau	15.3084	14.4325	16.4469	24.8448	45.9778	40.6827	39.467	0.422386	-0.920421	0.000381976	0.0369273	chr11	+	104231390	104332090	7531	protein_coding	microtubule-associated_protein_tau
ENSMUSG00000029759	Pon3	0.530575	0.42862	paraoxonase_3	15.3084	34.9419	27.0199	35.6469	65.5428	80.1689	51.8709	0.42862	-0.914372	0.000334089	0.0333569	chr6	-	5220852	5256286	3385	protein_coding	paraoxonase_3
ENSMUSG00000024922	Ovol1	0.530978	0.160005	OVO_homolog-like_1_(Drosophila)	2.91588	3.03843	1.17478	0	13.6955	9.57241	10.1487	0.160005	-0.913277	0.00119351	0.08811	chr19	-	5549137	5560575	2900	protein_coding	OVO_homolog-like_1_(Drosophila)
ENSMUSG00000063681	Crb1	0.532872	0.262459	crumbs_family_member_1_photoreceptor_morphogenesis_associated	7.2897	1.51921	2.34956	7.56146	12.7173	22.7345	18.0421	0.262459	-0.90814	0.00180824	0.11716	chr1	-	139197056	139377100	14432	protein_coding	crumbs_family_member_1_photoreceptor_morphogenesis_associated
ENSMUSG00000033722	BC034090	0.534616	0.404111	cDNA_sequence_BC034090	70.7101	16.7113	46.9912	72.374	154.564	142.39	86.8274	0.404111	-0.903425	0.000831936	0.0649603	chr1	-	155212471	155244444	8222	protein_coding	cDNA_sequence_BC034090
ENSMUSG00000028289	Epha7	0.535119	0.359259	Eph_receptor_A7	5.10279	7.59606	10.573	11.8823	17.6085	28.7172	27.0631	0.359259	-0.902069	0.00157792	0.107076	chr4	+	28813131	28967499	9884	protein_coding	Eph_receptor_A7
ENSMUSG00000041119	Pde9a	0.535522	0.238666	phosphodiesterase_9A	0.72897	3.03843	4.69912	5.40104	20.5433	8.37586	14.6592	0.238666	-0.900982	0.00178675	0.116387	chr17	+	31386234	31476310	2834	protein_coding	phosphodiesterase_9A
ENSMUSG00000000197	Nalcn	0.535737	0.143049	sodium_leak_channel_non-selective	1.45794	0.759606	2.34956	1.08021	14.6738	4.78621	10.1487	0.143049	-0.900404	0.00109497	0.0818268	chr14	-	123276641	123627144	7115	protein_coding	sodium_leak_channel_non-selective
ENSMUSG00000032500	Dclk3	0.537564	0.230905	doublecortin-like_kinase_3	3.64485	4.55764	0	5.40104	13.6955	20.3414	10.1487	0.230905	-0.895492	0.00195644	0.121843	chr9	+	111439081	111489118	3005	protein_coding	doublecortin-like_kinase_3
ENSMUSG00000044485	Klk1b11	0.538827	0.442127	kallikrein_1-related_peptidase_b11	40.0933	33.4227	61.0885	63.7323	62.608	134.014	139.826	0.442127	-0.892106	0.000404374	0.0387849	chr7	+	43995877	43999875	863	protein_coding	kallikrein_1-related_peptidase_b11
ENSMUSG00000107881	Gm44250	0.541842	0.462464	predicted_gene_44250	24.056	37.9803	44.6416	47.5292	70.434	104.1	75.5511	0.462464	-0.884056	0.000224181	0.0243816	chr6	-	5216258	5220486	4229	TEC	predicted_gene_44250
ENSMUSG00000034308	Sdr42e1	0.546493	0.357391	short_chain_dehydrogenase/reductase_family_42E_member_1	5.10279	9.87488	7.04868	7.56146	21.5215	19.1448	21.4249	0.357391	-0.871725	0.00237671	0.137184	chr8	-	117661399	117673689	2957	protein_coding	short_chain_dehydrogenase/reductase_family_42E_member_1
ENSMUSG00000038349	Plcl1	0.54951	0.375915	phospholipase_C-like_1	8.74764	6.83646	9.39824	8.64167	21.5215	27.5207	18.0421	0.375915	-0.863782	0.00237946	0.137184	chr1	+	55405921	55754285	6687	protein_coding	phospholipase_C-like_1
ENSMUSG00000032968	Inha	0.550171	0.214458	inhibin_alpha	3.64485	12.1537	0	3.24063	41.0865	11.9655	13.5315	0.214458	-0.862049	0.00253272	0.140666	chr1	+	75507077	75510366	1475	protein_coding	inhibin_alpha
ENSMUSG00000076617	Ighm	0.55178	0.287106	immunoglobulin_heavy_constant_mu	7.2897	28.865	5.8739	7.56146	85.1078	27.5207	16.9144	0.287106	-0.857836	0.00321047	0.163472	chr12	-	113418558	113422730	1886	IG_C_gene	immunoglobulin_heavy_constant_mu
ENSMUSG00000058402	Zfp420	0.552355	0.323487	zinc_finger_protein_420	5.83176	6.07685	4.69912	6.48125	25.4345	17.9483	10.1487	0.323487	-0.856333	0.0032477	0.163472	chr7	+	29859979	29877292	5751	protein_coding	zinc_finger_protein_420
ENSMUSG00000031382	Asb11	0.552931	0.357488	ankyrin_repeat_and_SOCS_box-containing_11	2.91588	9.11528	16.4469	8.64167	19.565	33.5034	24.8078	0.357488	-0.854828	0.0031091	0.161846	chrX	+	164436994	164459170	2847	protein_coding	ankyrin_repeat_and_SOCS_box-containing_11
ENSMUSG00000044791	Setd2	0.558456	0.490651	SET_domain_containing_2	45.9251	33.4227	31.719	47.5292	80.2165	75.3827	86.8274	0.490651	-0.840484	0.000175891	0.0200418	chr9	+	110532597	110618633	10754	protein_coding	SET_domain_containing_2
ENSMUSG00000033083	Tbc1d4	0.562258	0.48808	TBC1_domain_family_member_4	35.7195	45.5764	32.8938	41.0479	61.6298	95.7241	81.1893	0.48808	-0.830697	0.000279788	0.0286394	chr14	-	101442360	101609191	7676	protein_coding	TBC1_domain_family_member_4
ENSMUSG00000046008	Pnlip	0.563311	0.522798	pancreatic_lipase	320552	297314	513235	384175	628416	810380	735003	0.522798	-0.827996	8.82e-06	0.00176106	chr19	+	58670365	58681786	1485	protein_coding	pancreatic_lipase
ENSMUSG00000033488	BC026585	0.569256	0.348637	cDNA_sequence_BC026585	6.56073	3.79803	7.04868	8.64167	19.565	26.3241	10.1487	0.348637	-0.812851	0.00519868	0.223764	chr1	+	157458577	157492638	2534	protein_coding	cDNA_sequence_BC026585
ENSMUSG00000018750	Zbtb4	0.571181	0.532681	zinc_finger_and_BTB_domain_containing_4	88.2054	94.1912	97.5067	75.6146	167.281	167.517	165.761	0.532681	-0.80798	9.52e-06	0.00183757	chr11	+	69765912	69784023	8117	protein_coding	zinc_finger_and_BTB_domain_containing_4
ENSMUSG00000024866	Acy3	0.571466	0.150977	aspartoacylase_(aminoacylase)_3	1.45794	1.51921	0	2.16042	5.8695	8.37586	11.2763	0.150977	-0.807261	0.00298835	0.15758	chr19	+	3986661	3990007	1505	protein_coding	aspartoacylase_(aminoacylase)_3
ENSMUSG00000074207	Adh1	0.572276	0.467333	alcohol_dehydrogenase_1_(class_I)	27.7009	21.269	16.4469	28.0854	38.1518	63.4172	48.488	0.467333	-0.805218	0.00157466	0.107076	chr3	+	138260991	138290698	2233	protein_coding	alcohol_dehydrogenase_1_(class_I)
ENSMUSG00000029074	Ttll10	0.572822	0.313669	tubulin_tyrosine_ligase-like_family_member_10	5.10279	5.31724	5.8739	3.24063	24.4563	14.3586	7.8934	0.313669	-0.803841	0.0057598	0.242769	chr4	-	156034840	156059414	3985	protein_coding	tubulin_tyrosine_ligase-like_family_member_10
ENSMUSG00000063873	Slc24a3	0.574605	0.354924	solute_carrier_family_24_(sodium/potassium/calcium_exchanger)_member_3	8.74764	4.55764	5.8739	5.40104	13.6955	17.9483	20.2973	0.354924	-0.799358	0.00589884	0.24692	chr2	+	145167754	145642166	4564	protein_coding	solute_carrier_family_24_(sodium/potassium/calcium_exchanger)_member_3
ENSMUSG00000109486	RP24-342P18.3	0.577222	0.526155	NA	128.299	69.1242	124.527	105.86	193.694	196.234	219.888	0.526155	-0.792802	0.000127671	0.0157087	chr7	+	131256693	131306191	2834	transcribed_unprocessed_pseudogene	NA
ENSMUSG00000028927	Padi2	0.578871	0.537083	peptidyl_arginine_deiminase_type_II	137.046	104.066	128.051	168.513	258.258	211.79	280.78	0.537083	-0.788686	4.4e-05	0.0063858	chr4	+	140906344	140952586	5013	protein_coding	peptidyl_arginine_deiminase_type_II
ENSMUSG00000046589	Lrrc8e	0.579076	0.383338	leucine_rich_repeat_containing_8_family_member_E	6.56073	9.11528	8.22346	5.40104	17.6085	23.931	15.7868	0.383338	-0.788175	0.00623369	0.259032	chr8	+	4226827	4237470	4134	protein_coding	leucine_rich_repeat_containing_8_family_member_E
ENSMUSG00000029913	Prdm5	0.579597	0.0939542	PR_domain_containing_5	0.72897	0.759606	0	1.08021	7.826	4.78621	7.8934	0.0939542	-0.786878	0.00226073	0.13499	chr6	+	65778988	65937010	9295	protein_coding	PR_domain_containing_5
ENSMUSG00000005533	Igf1r	0.580694	0.511606	insulin-like_growth_factor_I_receptor	46.6541	63.0473	42.2921	41.0479	108.586	71.7931	102.614	0.511606	-0.784151	0.000514966	0.0464652	chr7	+	67952827	68233668	16791	protein_coding	insulin-like_growth_factor_I_receptor
ENSMUSG00000011034	Slc5a1	0.582868	0.307287	solute_carrier_family_5_(sodium/glucose_cotransporter)_member_1	3.64485	3.03843	7.04868	2.16042	10.7608	16.7517	11.2763	0.307287	-0.77876	0.00727523	0.284951	chr5	+	33104219	33162870	4104	protein_coding	solute_carrier_family_5_(sodium/glucose_cotransporter)_member_1
ENSMUSG00000073418	C4b	0.584331	0.480618	complement_component_4B_(Chido_blood_group)	70.7101	52.4128	41.1173	24.8448	115.434	64.6138	115.018	0.480618	-0.775143	0.00240969	0.137805	chr17	-	34728380	34743882	5695	protein_coding	complement_component_4B_(Chido_blood_group)
ENSMUSG00000107655	Gm44220	0.584522	0.368032	predicted_gene_44220	6.56073	10.6345	7.04868	4.32083	12.7173	26.3241	19.1697	0.368032	-0.774671	0.00754683	0.288175	chr6	+	93241720	93244206	2487	TEC	predicted_gene_44220
ENSMUSG00000033751	Gadd45gip1	0.585876	0.381832	growth_arrest_and_DNA-damage-inducible_gamma_interacting_protein_1	10.2056	11.3941	4.69912	5.40104	26.4128	15.5552	20.2973	0.381832	-0.771334	0.00751817	0.287984	chr8	+	84831522	84835482	2494	protein_coding	growth_arrest_and_DNA-damage-inducible_gamma_interacting_protein_1
ENSMUSG00000039166	Akap7	0.586979	0.382965	A_kinase_(PRKA)_anchor_protein_7	6.56073	4.55764	12.9226	4.32083	20.5433	20.3414	14.6592	0.382965	-0.768619	0.0081199	0.3034	chr10	-	25169090	25307870	4375	protein_coding	A_kinase_(PRKA)_anchor_protein_7
ENSMUSG00000051910	Sox6	0.587216	0.484592	SRY_(sex_determining_region_Y)-box_6	16.7663	25.067	25.8452	32.4063	39.13	71.7931	43.9775	0.484592	-0.768037	0.00305312	0.159614	chr7	-	115470872	116038796	14832	protein_coding	SRY_(sex_determining_region_Y)-box_6
ENSMUSG00000002688	Prkd1	0.590091	0.242941	protein_kinase_D1	2.18691	1.51921	2.34956	3.24063	13.6955	5.98276	9.02103	0.242941	-0.760992	0.00695631	0.275197	chr12	-	50341231	50649223	3778	protein_coding	protein_kinase_D1
ENSMUSG00000061718	Ppp1r1b	0.590496	0.464308	protein_phosphatase_1_regulatory_(inhibitor)_subunit_1B	80.9157	28.865	23.4956	30.2458	85.1078	93.331	85.6998	0.464308	-0.76	0.00456306	0.205129	chr11	+	98348404	98357796	2928	protein_coding	protein_phosphatase_1_regulatory_(inhibitor)_subunit_1B
ENSMUSG00000027376	Prom2	0.592419	0.516966	prominin_2	126.112	47.0956	95.1571	129.625	195.65	186.662	195.08	0.516966	-0.75531	0.00147343	0.103745	chr2	-	127526473	127541467	5187	protein_coding	prominin_2
ENSMUSG00000036381	P2ry14	0.594042	0.529494	purinergic_receptor_P2Y_G-protein_coupled_14	121.009	107.864	75.1859	182.555	192.715	241.703	254.844	0.529494	-0.751362	0.000812305	0.0638367	chr3	-	59113855	59153618	11059	protein_coding	purinergic_receptor_P2Y_G-protein_coupled_14
ENSMUSG00000048186	Bend7	0.595044	0.394127	BEN_domain_containing_7	8.01867	9.11528	4.69912	7.56146	24.4563	17.9483	13.5315	0.394127	-0.748931	0.00955586	0.339358	chr2	+	4717831	4802142	4194	protein_coding	BEN_domain_containing_7
ENSMUSG00000057193	Slc44a2	0.595655	0.504277	solute_carrier_family_44_member_2	31.3457	34.1823	24.6704	31.326	75.3253	68.2034	37.2117	0.504277	-0.74745	0.00268995	0.146278	chr9	+	21337828	21355025	3456	protein_coding	solute_carrier_family_44_member_2
ENSMUSG00000090062	Galnt6os	0.595762	0.512908	UDP-N-acetyl-alpha-D-galactosamine:polypeptide_N-acetylgalactosaminyltransferase_6_opposite_strand	136.317	107.104	165.644	98.299	398.148	192.645	151.102	0.512908	-0.747192	0.0022831	0.135002	chr15	+	100695780	100704896	1389	antisense	UDP-N-acetyl-alpha-D-galactosamine:polypeptide_N-acetylgalactosaminyltransferase_6_opposite_strand
ENSMUSG00000050103	Agmo	0.59842	0.381375	alkylglycerol_monooxygenase	8.74764	2.27882	5.8739	15.1229	16.6303	21.5379	24.8078	0.381375	-0.740769	0.0109117	0.371272	chr12	+	37241641	37582202	6285	protein_coding	alkylglycerol_monooxygenase
ENSMUSG00000029368	Alb	0.599964	0.126038	albumin	0.72897	0.759606	0	2.16042	6.84775	3.58965	11.2763	0.126038	-0.737053	0.00439979	0.203007	chr5	+	90460897	90476602	2342	protein_coding	albumin
ENSMUSG00000001604	Tcea3	0.600388	0.514299	transcription_elongation_factor_A_(SII)_3	44.4672	62.2877	81.0598	44.2885	66.521	120.852	151.102	0.514299	-0.736033	0.0029348	0.155877	chr4	+	136247729	136274898	1400	protein_coding	transcription_elongation_factor_A_(SII)_3
ENSMUSG00000039648	Ccbl1	0.600956	0.540148	cysteine_conjugate-beta_lyase_1	46.6541	42.538	41.1173	36.7271	78.26	83.7586	69.913	0.540148	-0.734668	0.000723139	0.0585132	chr2	-	30185124	30205847	2923	protein_coding	cysteine_conjugate-beta_lyase_1
ENSMUSG00000073125	Xlr3b	0.601169	0.108219	X-linked_lymphocyte-regulated_3B	0	2.27882	0	1.08021	12.7173	7.17931	3.38289	0.108219	-0.734158	0.0039838	0.18748	chrX	+	73192207	73202930	3780	protein_coding	X-linked_lymphocyte-regulated_3B
ENSMUSG00000054263	Lifr	0.602361	0.572133	leukemia_inhibitory_factor_receptor	351.363	310.679	340.686	461.249	674.015	668.872	576.218	0.572133	-0.7313	1.82e-05	0.00315996	chr15	+	7129559	7197489	10330	protein_coding	leukemia_inhibitory_factor_receptor
ENSMUSG00000021065	Fut8	0.603188	0.562617	fucosyltransferase_8	75.8129	109.383	91.6328	96.1386	164.346	179.483	153.358	0.562617	-0.729321	0.000129429	0.0157658	chr12	+	77238104	77476338	3543	protein_coding	fucosyltransferase_8
ENSMUSG00000071540	3425401B19Rik	0.604673	0.257736	RIKEN_cDNA_3425401B19_gene	1.45794	3.79803	2.34956	3.24063	6.84775	17.9483	6.76577	0.257736	-0.725773	0.0102454	0.352539	chr14	-	32659119	32685272	5547	protein_coding	RIKEN_cDNA_3425401B19_gene
ENSMUSG00000020029	Nudt4	0.605848	0.556522	nudix_(nucleoside_diphosphate_linked_moiety_X)-type_motif_4	106.43	143.566	155.071	154.47	177.063	268.028	308.97	0.556522	-0.722973	0.000472066	0.043238	chr10	-	95547007	95564167	3231	protein_coding	nudix_(nucleoside_diphosphate_linked_moiety_X)-type_motif_4
ENSMUSG00000106641	Gm43534	0.606347	0.366241	predicted_gene_43534	16.7663	3.79803	7.04868	4.32083	30.3258	21.5379	13.5315	0.366241	-0.721785	0.013233	0.412729	chr3	-	96464072	96466924	2853	TEC	predicted_gene_43534
ENSMUSG00000037709	Fam13a	0.606489	0.509326	family_with_sequence_similarity_13_member_A	22.5981	57.7301	32.8938	56.1708	98.8033	89.7414	60.892	0.509326	-0.721448	0.00492595	0.214296	chr6	-	58932090	59024549	10505	protein_coding	family_with_sequence_similarity_13_member_A
ENSMUSG00000000440	Pparg	0.606657	0.158389	peroxisome_proliferator_activated_receptor_gamma	2.18691	3.79803	0	0	4.89125	15.5552	7.8934	0.158389	-0.721048	0.00687039	0.274388	chr6	+	115360951	115490399	2953	protein_coding	peroxisome_proliferator_activated_receptor_gamma
ENSMUSG00000057880	Abat	0.606816	0.493492	4-aminobutyrate_aminotransferase	12.3925	22.7882	19.9713	14.0427	34.2388	37.0931	33.8289	0.493492	-0.72067	0.0066542	0.267555	chr16	+	8513429	8621568	7748	protein_coding	4-aminobutyrate_aminotransferase
ENSMUSG00000032425	Zfp949	0.607486	0.424271	zinc_finger_protein_949	7.2897	8.35567	5.8739	14.0427	30.3258	16.7517	15.7868	0.424271	-0.719077	0.0126554	0.407818	chr9	+	88548020	88571061	4110	protein_coding	zinc_finger_protein_949
ENSMUSG00000040345	Arhgap9	0.608084	0.367322	Rho_GTPase_activating_protein_9	8.01867	4.55764	4.69912	4.32083	17.6085	9.57241	16.9144	0.367322	-0.717656	0.0137709	0.422774	chr10	+	127323727	127329943	1811	protein_coding	Rho_GTPase_activating_protein_9
ENSMUSG00000027792	Bche	0.609464	0.474626	butyrylcholinesterase	13.1215	34.9419	16.4469	39.9677	41.0865	77.7758	46.2328	0.474626	-0.714387	0.00946622	0.338147	chr3	-	73635808	73708415	6741	protein_coding	butyrylcholinesterase
ENSMUSG00000020581	Agr2	0.612796	0	anterior_gradient_2	0	0	0	0	0	13.1621	10.1487	0	-0.706522	0.00163874	0.110285	chr12	+	35992907	36004087	1291	protein_coding	anterior_gradient_2
ENSMUSG00000024055	Cyp4f13	0.613685	0.536242	cytochrome_P450_family_4_subfamily_f_polypeptide_13	29.8878	26.5862	23.4956	29.1656	51.8473	46.6655	54.1262	0.536242	-0.70443	0.00316482	0.163472	chr17	-	32924688	32947402	3330	protein_coding	cytochrome_P450_family_4_subfamily_f_polypeptide_13
ENSMUSG00000001627	Ifrd1	0.61427	0.550124	interferon-related_developmental_regulator_1	424.989	904.691	493.407	502.297	1000.75	1389.2	780.319	0.550124	-0.703056	0.0018668	0.118946	chr12	-	40201567	40248504	5858	protein_coding	interferon-related_developmental_regulator_1
ENSMUSG00000038517	Tbkbp1	0.615315	0.429168	TBK1_binding_protein_1	20.4112	8.35567	8.22346	14.0427	50.869	19.1448	19.1697	0.429168	-0.700603	0.0150745	0.438823	chr11	-	97136171	97151495	3975	protein_coding	TBK1_binding_protein_1
ENSMUSG00000017713	Tha1	0.616317	0.419719	threonine_aldolase_1	15.3084	9.87488	7.04868	5.40104	27.391	26.3241	13.5315	0.419719	-0.698255	0.0154655	0.439128	chr11	-	117867952	117873481	2910	protein_coding	threonine_aldolase_1
ENSMUSG00000020333	Acsl6	0.617002	0.160383	acyl-CoA_synthetase_long-chain_family_member_6	0.72897	3.03843	0	1.08021	9.7825	8.37586	4.51052	0.160383	-0.696652	0.00818706	0.304044	chr11	+	54303798	54364756	9914	protein_coding	acyl-CoA_synthetase_long-chain_family_member_6
ENSMUSG00000040147	Maob	0.617679	0.49524	monoamine_oxidase_B	14.5794	7.59606	22.3208	18.3635	30.3258	29.9138	34.9565	0.49524	-0.695071	0.0115894	0.387832	chrX	-	16709282	16817366	2789	protein_coding	monoamine_oxidase_B
ENSMUSG00000022346	Myc	0.620252	0.543115	myelocytomatosis_oncogene	32.8036	66.0857	46.9912	34.5667	96.8468	80.1689	72.1682	0.543115	-0.689074	0.00408809	0.190793	chr15	+	61985341	61990374	2767	protein_coding	myelocytomatosis_oncogene
ENSMUSG00000046020	Pofut1	0.620919	0.543086	protein_O-fucosyltransferase_1	36.4485	31.9035	31.719	29.1656	78.26	56.2379	43.9775	0.543086	-0.687522	0.00444035	0.204105	chr2	+	153241533	153270247	9912	protein_coding	protein_O-fucosyltransferase_1
ENSMUSG00000049858	Suox	0.621195	0.406032	sulfite_oxidase	4.37382	4.55764	7.04868	7.56146	14.6738	10.769	18.0421	0.406032	-0.686881	0.0183512	0.483587	chr10	-	128669887	128673918	2349	protein_coding	sulfite_oxidase
ENSMUSG00000021998	Lcp1	0.62147	0.553428	lymphocyte_cytosolic_protein_1	69.2521	50.134	50.5155	81.0156	78.26	139.997	121.784	0.553428	-0.686242	0.00287482	0.154948	chr14	+	75131101	75230842	9504	protein_coding	lymphocyte_cytosolic_protein_1
ENSMUSG00000033960	9430020K01Rik	0.6221	0.492874	RIKEN_cDNA_9430020K01_gene	16.7663	16.7113	10.573	15.1229	40.1083	25.1276	24.8078	0.492874	-0.684782	0.0121061	0.398667	chr18	+	4634929	4682868	6730	protein_coding	RIKEN_cDNA_9430020K01_gene
ENSMUSG00000034220	Gpc1	0.622713	0.561057	glypican_1	42.2803	47.8552	36.4182	37.8073	74.347	76.5793	68.7854	0.561057	-0.683362	0.00184103	0.118029	chr1	+	92831645	92860779	5159	protein_coding	glypican_1
ENSMUSG00000053898	Ech1	0.622766	0.579028	enoyl_coenzyme_A_hydratase_1_peroxisomal	57.5886	72.1626	59.9138	71.2938	112.499	117.262	108.252	0.579028	-0.683237	0.0005641	0.0490807	chr7	+	28825217	28832247	2284	protein_coding	enoyl_coenzyme_A_hydratase_1_peroxisomal
ENSMUSG00000020183	Cpm	0.623024	0.540022	carboxypeptidase_M	32.0747	28.1054	25.8452	23.7646	61.6298	50.2552	40.5946	0.540022	-0.68264	0.00521904	0.223849	chr10	+	117629500	117687352	5964	protein_coding	carboxypeptidase_M
ENSMUSG00000053580	Tanc2	0.623032	0.569195	tetratricopeptide_repeat_ankyrin_repeat_and_coiled-coil_containing_2	48.112	55.4513	43.4668	62.6521	81.1948	98.1172	96.9761	0.569195	-0.682621	0.00131667	0.0949016	chr11	+	105589986	105929304	16605	protein_coding	tetratricopeptide_repeat_ankyrin_repeat_and_coiled-coil_containing_2
ENSMUSG00000059654	Reg1	0.62391	0.593725	regenerating_islet-derived_1	65527.1	105212	81479.2	88927.1	135061	133424	162453	0.593725	-0.680589	7.02e-05	0.00939333	chr6	+	78422711	78428667	904	protein_coding	regenerating_islet-derived_1
ENSMUSG00000062785	Kcnc3	0.625769	0.437269	potassium_voltage_gated_channel_Shaw-related_subfamily_member_3	19.6822	7.59606	22.3208	4.32083	36.1953	17.9483	38.3394	0.437269	-0.676299	0.0193603	0.490912	chr7	+	44590664	44604754	5995	protein_coding	potassium_voltage_gated_channel_Shaw-related_subfamily_member_3
ENSMUSG00000032456	Nmnat3	0.626977	0.454176	nicotinamide_nucleotide_adenylyltransferase_3	9.47661	6.83646	9.39824	7.56146	16.6303	19.1448	19.1697	0.454176	-0.673515	0.0187621	0.486092	chr9	+	98287435	98420438	5004	protein_coding	nicotinamide_nucleotide_adenylyltransferase_3
ENSMUSG00000030717	Nupr1	0.627482	0.570531	nuclear_protein_transcription_regulator_1	3458.96	6487.8	6974.67	4380.25	9739.46	11626.9	6636.1	0.570531	-0.672354	0.00215327	0.130368	chr7	-	126623249	126630861	2514	protein_coding	nuclear_protein_transcription_regulator_1
ENSMUSG00000018398	2017-09-08	0.627591	0.517015	septin_8	32.8036	28.1054	18.7965	19.4438	69.4558	38.2896	36.0841	0.517015	-0.672103	0.0107368	0.366345	chr11	+	53519257	53549565	6087	protein_coding	septin_8
ENSMUSG00000028307	Aldob	0.62908	0.320104	aldolase_B_fructose-bisphosphate	1.45794	3.79803	5.8739	10.8021	3.913	21.5379	25.9355	0.320104	-0.668685	0.0192077	0.490501	chr4	-	49535995	49549546	2392	protein_coding	aldolase_B_fructose-bisphosphate
ENSMUSG00000021930	Spryd7	0.630529	0.456845	SPRY_domain_containing_7	6.56073	8.35567	18.7965	8.64167	14.6738	32.3069	22.5526	0.456845	-0.665366	0.020953	0.515612	chr14	-	61531993	61556886	4002	protein_coding	SPRY_domain_containing_7
ENSMUSG00000062312	Erbb2	0.630604	0.436146	erb-b2_receptor_tyrosine_kinase_2	5.10279	10.6345	5.8739	8.64167	20.5433	17.9483	13.5315	0.436146	-0.665194	0.021617	0.521419	chr11	+	98412470	98437716	5210	protein_coding	erb-b2_receptor_tyrosine_kinase_2
ENSMUSG00000033350	Chst2	0.631112	0.604195	carbohydrate_sulfotransferase_2	646.596	593.253	553.321	670.809	989.011	848.355	1221.22	0.604195	-0.664032	5.03e-05	0.00703945	chr9	-	95399292	95406722	7328	protein_coding	carbohydrate_sulfotransferase_2
ENSMUSG00000071379	Hpcal1	0.63223	0.576111	hippocalcin-like_1	52.4858	52.4128	71.6616	38.8875	85.1078	102.903	92.4656	0.576111	-0.661478	0.00264131	0.144927	chr12	+	17690814	17791926	1561	protein_coding	hippocalcin-like_1
ENSMUSG00000028086	Fbxw7	0.632312	0.571771	F-box_and_WD-40_domain_protein_7	52.4858	49.3744	34.0686	55.0906	85.1078	72.9896	92.4656	0.571771	-0.661291	0.00272672	0.147618	chr3	+	84815268	84979198	7046	protein_coding	F-box_and_WD-40_domain_protein_7
ENSMUSG00000048424	Ranbp3l	0.632524	0.195519	RAN_binding_protein_3-like	0.72897	0.759606	9.39824	0	26.4128	11.9655	3.38289	0.195519	-0.660809	0.0117342	0.391602	chr15	+	8968426	9066551	3034	protein_coding	RAN_binding_protein_3-like
ENSMUSG00000026739	Bmi1	0.633644	0.538507	Bmi1_polycomb_ring_finger_oncogene	15.3084	33.4227	31.719	48.6094	51.8473	67.0069	60.892	0.538507	-0.658256	0.0114809	0.385258	chr2	+	18677018	18686629	3974	protein_coding	Bmi1_polycomb_ring_finger_oncogene
ENSMUSG00000042302	Ehbp1	0.634377	0.510017	EH_domain_binding_protein_1	20.4112	11.3941	17.6217	14.0427	42.0648	28.7172	22.5526	0.510017	-0.656588	0.0166113	0.457788	chr11	-	22005828	22342292	5825	protein_coding	EH_domain_binding_protein_1
ENSMUSG00000025017	Pik3ap1	0.635647	0.578249	phosphoinositide-3-kinase_adaptor_protein_1	63.4204	76.7202	109.255	66.9729	179.02	100.51	130.805	0.578249	-0.653701	0.00389463	0.18748	chr19	-	41274218	41385070	2615	protein_coding	phosphoinositide-3-kinase_adaptor_protein_1
ENSMUSG00000058240	Cryzl1	0.635796	0.50879	crystallin_zeta_(quinone_reductase)-like_1	10.9345	23.5478	18.7965	10.8021	34.2388	27.5207	32.7012	0.50879	-0.653364	0.0171809	0.466104	chr16	-	91689322	91728975	4353	protein_coding	crystallin_zeta_(quinone_reductase)-like_1
ENSMUSG00000035413	Tmem98	0.636845	0.527297	transmembrane_protein_98	16.7663	23.5478	14.0974	17.2833	37.1735	28.7172	36.0841	0.527297	-0.650985	0.0135911	0.419123	chr11	+	80810175	80822033	1633	protein_coding	transmembrane_protein_98
ENSMUSG00000090093	Gm14399	0.638155	0.385859	predicted_gene_14399	4.37382	3.79803	5.8739	5.40104	10.7608	19.1448	7.8934	0.385859	-0.64802	0.0258194	0.576401	chr2	-	175129493	175142012	2561	protein_coding	predicted_gene_14399
ENSMUSG00000061601	Pclo	0.638177	0.54623	piccolo_(presynaptic_cytomatrix_protein)	17.4953	33.4227	19.9713	28.0854	48.9125	41.8793	45.1052	0.54623	-0.647972	0.0109831	0.372661	chr5	+	14514918	14863459	22457	protein_coding	piccolo_(presynaptic_cytomatrix_protein)
ENSMUSG00000034327	Kctd9	0.638383	0.500489	potassium_channel_tetramerisation_domain_containing_9	6.56073	13.6729	14.0974	12.9625	24.4563	22.7345	23.6802	0.500489	-0.647506	0.021105	0.517263	chr14	+	67715937	67742310	4746	protein_coding	potassium_channel_tetramerisation_domain_containing_9
ENSMUSG00000034930	Rtkn	0.639063	0.497362	rhotekin	16.0373	12.1537	10.573	9.72188	25.4345	25.1276	22.5526	0.497362	-0.645971	0.0198889	0.498001	chr6	+	83135463	83152579	4083	protein_coding	rhotekin
ENSMUSG00000000811	Txnrd3	0.640317	0.473311	thioredoxin_reductase_3	10.9345	14.4325	7.04868	8.64167	19.565	26.3241	19.1697	0.473311	-0.643141	0.0234338	0.544747	chr6	+	89643988	89675529	2836	protein_coding	thioredoxin_reductase_3
ENSMUSG00000038156	Spon1	0.640794	0.486396	spondin_1_(f-spondin)_extracellular_matrix_protein	15.3084	10.6345	9.39824	12.9625	20.5433	35.8965	18.0421	0.486396	-0.642067	0.022672	0.534174	chr7	+	113765998	114043370	8177	protein_coding	spondin_1_(f-spondin)_extracellular_matrix_protein
ENSMUSG00000054446	Cpa1	0.641097	0.607207	carboxypeptidase_A1_pancreatic	168908	147556	252957	211380	287209	329564	347643	0.607207	-0.641386	0.000417568	0.0397375	chr6	+	30639218	30645363	1750	protein_coding	carboxypeptidase_A1_pancreatic
ENSMUSG00000028865	Cd164l2	0.642134	0.324171	CD164_sialomucin-like_2	2.91588	1.51921	4.69912	3.24063	13.6955	4.78621	10.1487	0.324171	-0.639054	0.0240579	0.551443	chr4	+	133212131	133224555	1659	protein_coding	CD164_sialomucin-like_2
ENSMUSG00000087667	Gm13381	0.642465	0.523702	predicted_gene_13381	83.8315	99.5084	122.177	68.0531	342.388	113.672	78.934	0.523702	-0.638311	0.0190368	0.489214	chr2	+	28562197	28576698	922	antisense	predicted_gene_13381
ENSMUSG00000021592	Arsk	0.642722	0.4742	arylsulfatase_K	5.83176	9.87488	10.573	8.64167	15.652	21.5379	18.0421	0.4742	-0.637733	0.0263223	0.576401	chr13	-	76060422	76098660	5681	protein_coding	arylsulfatase_K
ENSMUSG00000044017	Adgrd1	0.642895	0.52186	adhesion_G_protein-coupled_receptor_D1	15.3084	14.4325	14.0974	15.1229	33.2605	32.3069	19.1697	0.52186	-0.637345	0.0193168	0.490912	chr5	+	129096750	129204599	8321	protein_coding	adhesion_G_protein-coupled_receptor_D1
ENSMUSG00000024940	Ltbp3	0.644246	0.593669	latent_transforming_growth_factor_beta_binding_protein_3	187.345	130.652	99.8563	130.705	265.106	185.465	242.44	0.593669	-0.634317	0.00238757	0.137184	chr19	+	5740904	5758532	5190	protein_coding	latent_transforming_growth_factor_beta_binding_protein_3
ENSMUSG00000027940	Tpm3	0.644445	0.598012	tropomyosin_3_gamma	92.5792	84.3163	77.5355	84.2563	106.629	159.141	158.996	0.598012	-0.633871	0.00158227	0.107076	chr3	+	90072649	90100902	6085	protein_coding	tropomyosin_3_gamma
ENSMUSG00000070360	Amy2a1	0.645736	0.599137	amylase_2a1	275.551	232.44	238.48	288.416	544.886	482.21	268.376	0.599137	-0.630985	0.0022763	0.135002	chr3	-	113529403	113532428	890	protein_coding	amylase_2a1
ENSMUSG00000006345	Ggt1	0.645965	0.622438	gamma-glutamyltransferase_1	714.39	593.253	868.162	697.815	1189.55	1110.4	1162.59	0.622438	-0.630471	7.11e-05	0.00941002	chr10	+	75561604	75586200	3411	protein_coding	gamma-glutamyltransferase_1
ENSMUSG00000001761	Smo	0.646044	0.538823	smoothened_frizzled_class_receptor	29.1588	53.1724	24.6704	22.6844	73.3688	39.4862	67.6577	0.538823	-0.630296	0.0165919	0.457788	chr6	+	29735503	29761365	5621	protein_coding	smoothened_frizzled_class_receptor
ENSMUSG00000029833	Trim24	0.646144	0.608246	tripartite_motif-containing_24	68.5232	78.2394	75.1859	77.775	119.347	135.21	115.018	0.608246	-0.630073	0.000984074	0.0744535	chr6	+	37870811	37966296	8521	protein_coding	tripartite_motif-containing_24
ENSMUSG00000035226	Rims4	0.64692	0.55405	regulating_synaptic_membrane_exocytosis_4	22.5981	28.1054	24.6704	19.4438	58.695	34.7	34.9565	0.55405	-0.628341	0.0147296	0.433385	chr2	-	163859751	163918683	4962	protein_coding	regulating_synaptic_membrane_exocytosis_4
ENSMUSG00000021327	Zkscan3	0.647095	0.569981	zinc_finger_with_KRAB_and_SCAN_domains_3	77.9998	61.5281	37.5929	50.7698	135.977	84.9551	78.934	0.569981	-0.62795	0.00900952	0.325939	chr13	-	21387013	21402755	7817	protein_coding	zinc_finger_with_KRAB_and_SCAN_domains_3
ENSMUSG00000095079	Igha	0.647766	0.259953	immunoglobulin_heavy_constant_alpha	0	8.35567	2.34956	1.08021	10.7608	11.9655	11.2763	0.259953	-0.626456	0.0224086	0.531939	chr12	-	113254830	113260236	2668	IG_C_gene	immunoglobulin_heavy_constant_alpha
ENSMUSG00000041272	Tox	0.648381	0.199082	thymocyte_selection-associated_high_mobility_group_box	0.72897	1.51921	1.17478	2.16042	3.913	3.58965	13.5315	0.199082	-0.625086	0.0166675	0.458299	chr4	-	6686353	6991557	7609	protein_coding	thymocyte_selection-associated_high_mobility_group_box
ENSMUSG00000039942	Ptger4	0.64839	0.54754	prostaglandin_E_receptor_4_(subtype_EP4)	21.8691	28.1054	14.0974	31.326	43.043	33.5034	54.1262	0.54754	-0.625066	0.0165196	0.457788	chr15	-	5206661	5244187	6648	protein_coding	prostaglandin_E_receptor_4_(subtype_EP4)
ENSMUSG00000024236	Svil	0.64859	0.592457	supervillin	59.7755	70.6434	64.6129	56.1708	109.564	134.014	74.4235	0.592457	-0.624621	0.00434524	0.201252	chr18	+	4920540	5119299	10640	protein_coding	supervillin
ENSMUSG00000031596	Slc7a2	0.649113	0.577938	solute_carrier_family_7_(cationic_amino_acid_transporter_y+_system)_member_2	144.336	90.3931	69.312	130.705	199.563	241.703	122.912	0.577938	-0.623458	0.00844413	0.311691	chr8	+	40862396	40922308	9135	protein_coding	solute_carrier_family_7_(cationic_amino_acid_transporter_y+_system)_member_2
ENSMUSG00000033910	Gucy1a3	0.649844	0.417842	guanylate_cyclase_1_soluble_alpha_3	7.2897	6.07685	4.69912	4.32083	13.6955	9.57241	16.9144	0.417842	-0.621835	0.0328183	0.640742	chr3	-	82092427	82145789	6968	protein_coding	guanylate_cyclase_1_soluble_alpha_3
ENSMUSG00000039519	Cyp7b1	0.649904	0.336701	cytochrome_P450_family_7_subfamily_b_polypeptide_1	2.18691	6.83646	2.34956	3.24063	6.84775	15.5552	10.1487	0.336701	-0.621701	0.0298629	0.613505	chr3	-	18071950	18243338	2166	protein_coding	cytochrome_P450_family_7_subfamily_b_polypeptide_1
ENSMUSG00000003872	Lin7b	0.649972	0.140045	lin-7_homolog_B_(C._elegans)	0	0.759606	1.17478	1.08021	6.84775	4.78621	4.51052	0.140045	-0.62155	0.0118086	1	chr7	-	45367892	45370564	715	protein_coding	lin-7_homolog_B_(C._elegans)
ENSMUSG00000106915	Gm42655	0.650194	0.367583	predicted_gene_42655	1.45794	5.31724	5.8739	9.72188	6.84775	27.5207	11.2763	0.367583	-0.621058	0.0310164	0.625515	chr5	+	120255258	120256391	1134	TEC	predicted_gene_42655
ENSMUSG00000040498	Igsf23	0.650884	0.515718	immunoglobulin_superfamily_member_23	13.1215	20.5094	14.0974	11.8823	19.565	29.9138	37.2117	0.515718	-0.619527	0.0248152	0.563945	chr7	-	19937305	19950756	2263	protein_coding	immunoglobulin_superfamily_member_23
ENSMUSG00000031337	Mtm1	0.651061	0.545609	X-linked_myotubular_myopathy_gene_1	19.6822	21.269	16.4469	23.7646	25.4345	46.6655	39.467	0.545609	-0.619136	0.0183846	0.483587	chrX	+	71210767	71315691	13935	protein_coding	X-linked_myotubular_myopathy_gene_1
ENSMUSG00000073988	Ttpa	0.651683	0.512633	tocopherol_(alpha)_transfer_protein	10.9345	12.1537	19.9713	21.6042	15.652	39.4862	39.467	0.512633	-0.617759	0.0281981	0.594258	chr4	+	20007938	20030785	3488	protein_coding	tocopherol_(alpha)_transfer_protein
ENSMUSG00000057132	Rpgrip1	0.651791	0.403561	retinitis_pigmentosa_GTPase_regulator_interacting_protein_1	10.2056	6.83646	5.8739	2.16042	19.565	19.1448	7.8934	0.403561	-0.617519	0.0339397	0.647993	chr14	+	52110704	52163546	12152	protein_coding	retinitis_pigmentosa_GTPase_regulator_interacting_protein_1
ENSMUSG00000050965	Prkca	0.651806	0.529722	protein_kinase_C_alpha	8.74764	15.9517	14.0974	19.4438	29.3475	21.5379	31.5736	0.529722	-0.617486	0.0255095	0.573306	chr11	-	107933387	108343928	8992	protein_coding	protein_kinase_C_alpha
ENSMUSG00000035237	Lcat	0.651957	0.556266	lecithin_cholesterol_acyltransferase	18.2242	18.9902	23.4956	16.2031	33.2605	28.7172	41.7223	0.556266	-0.617151	0.0180543	0.479127	chr8	-	105939551	105943382	1342	protein_coding	lecithin_cholesterol_acyltransferase
ENSMUSG00000052512	Nav2	0.652713	0.560393	neuron_navigator_2	20.4112	26.5862	19.9713	27.0052	44.9995	51.4517	29.3183	0.560393	-0.615478	0.0164481	0.457788	chr7	+	48898807	49610090	35940	protein_coding	neuron_navigator_2
ENSMUSG00000026469	Xpr1	0.653712	0.561968	xenotropic_and_polytropic_retrovirus_receptor_1	21.8691	26.5862	18.7965	29.1656	34.2388	53.8448	40.5946	0.561968	-0.613273	0.0158312	0.447424	chr1	-	155275701	155417415	17880	protein_coding	xenotropic_and_polytropic_retrovirus_receptor_1
ENSMUSG00000054252	Fgfr3	0.653762	0.472019	fibroblast_growth_factor_receptor_3	14.5794	16.7113	8.22346	5.40104	25.4345	14.3586	31.5736	0.472019	-0.613163	0.0329366	0.640742	chr5	+	33721674	33737068	7158	protein_coding	fibroblast_growth_factor_receptor_3
ENSMUSG00000044626	Liph	0.654412	0.416398	lipase_member_H	5.10279	7.59606	4.69912	9.72188	14.6738	5.98276	28.1907	0.416398	-0.611728	0.0356133	0.666323	chr16	-	21953826	21995542	3793	protein_coding	lipase_member_H
ENSMUSG00000047414	Flrt2	0.655004	0.559923	fibronectin_leucine_rich_transmembrane_protein_2	24.785	22.0286	27.0199	25.925	68.4775	34.7	30.446	0.559923	-0.610425	0.0203601	0.505104	chr12	+	95692226	95785215	7721	protein_coding	fibronectin_leucine_rich_transmembrane_protein_2
ENSMUSG00000028356	Ambp	0.655435	0.502672	alpha_1_microglobulin/bikunin	16.7663	15.1921	12.9226	7.56146	25.4345	35.8965	16.9144	0.502672	-0.609475	0.0304546	0.618278	chr4	-	63143275	63154799	1409	protein_coding	alpha_1_microglobulin/bikunin
ENSMUSG00000017858	Ift52	0.655556	0.580348	intraflagellar_transport_52	30.6167	24.3074	30.5443	27.0052	44.9995	58.631	41.7223	0.580348	-0.60921	0.0121724	0.398667	chr2	+	163017354	163046141	2802	protein_coding	intraflagellar_transport_52
ENSMUSG00000070709	1700049G17Rik	0.655626	0.435874	RIKEN_cDNA_1700049G17_gene	8.01867	5.31724	4.69912	6.48125	17.6085	15.5552	9.02103	0.435874	-0.609055	0.0365348	0.676338	chr7	-	27907392	27929460	7518	protein_coding	RIKEN_cDNA_1700049G17_gene
ENSMUSG00000020787	P2rx1	0.656023	0.577402	purinergic_receptor_P2X_ligand-gated_ion_channel_1	155.271	293.968	523.952	220.363	584.994	530.072	435.265	0.577402	-0.608182	0.0141267	0.426991	chr11	+	72999103	73015200	2625	protein_coding	purinergic_receptor_P2X_ligand-gated_ion_channel_1
ENSMUSG00000039063	Echdc3	0.656241	0.54867	enoyl_Coenzyme_A_hydratase_domain_containing_3	17.4953	25.067	17.6217	15.1229	31.304	29.9138	41.7223	0.54867	-0.607702	0.0213418	0.518892	chr2	-	6188465	6213033	2685	protein_coding	enoyl_Coenzyme_A_hydratase_domain_containing_3
ENSMUSG00000021704	Mtx3	0.656581	0.550248	metaxin_3	18.2242	22.0286	22.3208	20.524	49.8908	43.0758	20.2973	0.550248	-0.606956	0.0235628	0.546701	chr13	+	92844787	92858230	6275	protein_coding	metaxin_3
ENSMUSG00000033871	Ppargc1b	0.656799	0.402533	peroxisome_proliferative_activated_receptor_gamma_coactivator_1_beta	6.56073	7.59606	4.69912	3.24063	11.739	21.5379	7.8934	0.402533	-0.606475	0.037146	0.684533	chr18	-	61298136	61400431	3990	protein_coding	peroxisome_proliferative_activated_receptor_gamma_coactivator_1_beta
ENSMUSG00000063611	Gm10134	0.6575	0.449467	predicted_gene_10134	8.74764	6.07685	4.69912	6.48125	16.6303	14.3586	12.4039	0.449467	-0.604937	0.0375002	0.686902	chr2	+	28506095	28506475	381	protein_coding	predicted_gene_10134
ENSMUSG00000020325	Fstl3	0.657596	0.371001	follistatin-like_3	2.91588	3.03843	7.04868	5.40104	24.4563	5.98276	6.76577	0.371001	-0.604728	0.034499	0.654664	chr10	+	79777272	79782630	2445	protein_coding	follistatin-like_3
ENSMUSG00000025969	Nrp2	0.658105	0.534844	neuropilin_2	26.9719	58.4897	23.4956	15.1229	57.7168	61.0241	55.2538	0.534844	-0.60361	0.026087	0.576401	chr1	+	62703285	62818695	11842	protein_coding	neuropilin_2
ENSMUSG00000030102	Itpr1	0.658712	0.56216	inositol_145-trisphosphate_receptor_1	26.9719	21.269	28.1947	17.2833	48.9125	49.0586	27.0631	0.56216	-0.60228	0.0209356	0.515612	chr6	+	108213096	108551109	18292	protein_coding	inositol_145-trisphosphate_receptor_1
ENSMUSG00000054793	Cadm4	0.658712	0.527433	cell_adhesion_molecule_4	20.4112	18.9902	7.04868	21.6042	27.391	29.9138	39.467	0.527433	-0.60228	0.0282686	0.594716	chr7	+	24482023	24504539	2161	protein_coding	cell_adhesion_molecule_4
ENSMUSG00000020829	Slc46a1	0.659097	0.498987	solute_carrier_family_46_member_1	8.01867	10.6345	12.9226	7.56146	25.4345	11.9655	21.4249	0.498987	-0.601438	0.0361262	0.670813	chr11	+	78465697	78472059	3080	protein_coding	solute_carrier_family_46_member_1
ENSMUSG00000032816	Igdcc4	0.659494	0.554971	immunoglobulin_superfamily_DCC_subclass_member_4	26.9719	22.7882	22.3208	14.0427	30.3258	45.469	40.5946	0.554971	-0.600569	0.0212571	0.518892	chr9	+	65101486	65137940	6366	protein_coding	immunoglobulin_superfamily_DCC_subclass_member_4
ENSMUSG00000026458	Ppfia4	0.65984	0.418066	protein_tyrosine_phosphatase_receptor_type_f_polypeptide_(PTPRF)_interacting_protein_(liprin)_alpha_4	7.2897	3.79803	12.9226	5.40104	34.2388	8.37586	10.1487	0.418066	-0.599813	0.0388469	0.697458	chr1	-	134296783	134332928	6572	protein_coding	protein_tyrosine_phosphatase_receptor_type_f_polypeptide_(PTPRF)_interacting_protein_(liprin)_alpha_4
ENSMUSG00000071604	Fam189a2	0.660566	0.566412	family_with_sequence_similarity_189_member_A2	21.1401	15.9517	43.4668	29.1656	62.608	45.469	37.2117	0.566412	-0.598224	0.0249411	0.565279	chr19	-	23972751	24031019	2547	protein_coding	family_with_sequence_similarity_189_member_A2
ENSMUSG00000030701	Plekhb1	0.661063	0.615828	pleckstrin_homology_domain_containing_family_B_(evectins)_member_1	66.3363	52.4128	85.7589	75.6146	101.738	104.1	135.315	0.615828	-0.597141	0.00506468	0.219548	chr7	-	100642892	100662414	3713	protein_coding	pleckstrin_homology_domain_containing_family_B_(evectins)_member_1
ENSMUSG00000022415	Syngr1	0.661991	0.487836	synaptogyrin_1	8.74764	7.59606	7.04868	8.64167	15.652	15.5552	18.0421	0.487836	-0.595116	0.0387728	0.697458	chr15	+	80091334	80119501	4808	protein_coding	synaptogyrin_1
ENSMUSG00000022089	Bin3	0.663461	0.580188	bridging_integrator_3	19.6822	25.8266	22.3208	21.6042	40.1083	38.2896	37.2117	0.580188	-0.591917	0.0185369	0.483587	chr14	+	70100145	70138191	1712	protein_coding	bridging_integrator_3
ENSMUSG00000025059	Gk	0.663699	0.417483	glycerol_kinase	5.83176	3.79803	2.34956	9.72188	13.6955	8.37586	16.9144	0.417483	-0.591398	0.0418634	0.722292	chrX	-	85701937	85776819	7743	protein_coding	glycerol_kinase
ENSMUSG00000041794	Myrip	0.66372	0.594815	myosin_VIIA_and_Rab_interacting_protein	35.7195	44.0572	61.0885	55.0906	53.8038	86.1517	107.125	0.594815	-0.591352	0.0144333	0.428809	chr9	+	120303936	120474841	5440	protein_coding	myosin_VIIA_and_Rab_interacting_protein
ENSMUSG00000037016	Frem2	0.663741	0.447058	Fras1_related_extracellular_matrix_protein_2	5.83176	10.6345	14.0974	2.16042	14.6738	13.1621	27.0631	0.447058	-0.591307	0.0423998	0.724174	chr3	-	53513938	53657355	13255	protein_coding	Fras1_related_extracellular_matrix_protein_2
ENSMUSG00000027661	Slc2a10	0.663902	0.249157	solute_carrier_family_2_(facilitated_glucose_transporter)_member_10	0.72897	2.27882	2.34956	1.08021	7.826	4.78621	6.76577	0.249157	-0.590959	0.0266062	0.576401	chr2	+	165503787	165519917	3570	protein_coding	solute_carrier_family_2_(facilitated_glucose_transporter)_member_10
ENSMUSG00000031633	Slc25a4	0.663945	0.581284	solute_carrier_family_25_(mitochondrial_carrier_adenine_nucleotide_translocator)_member_4	32.0747	38.7399	31.719	25.925	56.7385	71.7931	37.2117	0.581284	-0.590863	0.0170593	0.463837	chr8	-	46206797	46211284	2353	protein_coding	solute_carrier_family_25_(mitochondrial_carrier_adenine_nucleotide_translocator)_member_4
ENSMUSG00000039264	Gimap3	0.664262	0.159005	GTPase_IMAP_family_member_3	0	1.51921	1.17478	1.08021	10.7608	4.78621	2.25526	0.159005	-0.590175	0.0169102	0.461844	chr6	-	48764464	48770851	2577	protein_coding	GTPase_IMAP_family_member_3
ENSMUSG00000067149	Jchain	0.6648	0.201079	immunoglobulin_joining_chain	0	6.83646	0	1.08021	15.652	5.98276	7.8934	0.201079	-0.589008	0.0224965	0.531967	chr5	-	88519809	88527891	2517	protein_coding	immunoglobulin_joining_chain
ENSMUSG00000036206	Sh3bp4	0.665957	0.521062	SH3-domain_binding_protein_4	17.4953	13.6729	8.22346	12.9625	18.5868	26.3241	30.446	0.521062	-0.586498	0.0356656	0.666323	chr1	+	89070415	89155068	5112	protein_coding	SH3-domain_binding_protein_4
ENSMUSG00000029814	Igf2bp3	1.50079	#DIV/0!	insulin-like_growth_factor_2_mRNA_binding_protein_3	2.18691	9.11528	3.52434	3.24063	0	0	0	#DIV/0!	0.585727	0.0124653	1	chr6	-	49085223	49214957	8159	protein_coding	insulin-like_growth_factor_2_mRNA_binding_protein_3
ENSMUSG00000029414	Kntc1	1.50079	#DIV/0!	kinetochore_associated_1	2.18691	9.11528	3.52434	3.24063	0	0	0	#DIV/0!	0.585727	0.0124653	1	chr5	+	123749716	123821593	7983	protein_coding	kinetochore_associated_1
ENSMUSG00000040136	Abcc8	1.50093	2.14649	ATP-binding_cassette_sub-family_C_(CFTR/MRP)_member_8	42.2803	14.4325	17.6217	21.6042	18.5868	4.78621	10.1487	2.14649	0.585852	0.0434425	0.730598	chr7	-	46104523	46180033	4952	protein_coding	ATP-binding_cassette_sub-family_C_(CFTR/MRP)_member_8
ENSMUSG00000032397	Tipin	1.50117	2.14979	timeless_interacting_protein	16.0373	21.269	12.9226	21.6042	1.9565	9.57241	13.5315	2.14979	0.586087	0.0438339	0.731917	chr9	+	64281607	64304792	1211	protein_coding	timeless_interacting_protein
ENSMUSG00000039828	Wdr70	1.50176	2.13028	WD_repeat_domain_70	11.6635	18.2306	12.9226	21.6042	8.80425	5.98276	7.8934	2.13028	0.586651	0.0426851	0.72517	chr15	-	7873055	8099209	2151	protein_coding	WD_repeat_domain_70
ENSMUSG00000015134	Aldh1a3	1.50283	9.00321	aldehyde_dehydrogenase_family_1_subfamily_A3	10.2056	7.59606	3.52434	2.16042	1.9565	0	0	9.00321	0.58768	0.0201956	0.503073	chr7	-	66390890	66427517	4617	protein_coding	aldehyde_dehydrogenase_family_1_subfamily_A3
ENSMUSG00000056870	Gulp1	1.50359	9.33623	GULP_engulfment_adaptor_PTB_domain_containing_1	5.10279	8.35567	1.17478	9.72188	1.9565	0	0	9.33623	0.58841	0.0199102	0.498001	chr1	+	44551511	44796838	3758	protein_coding	GULP_engulfment_adaptor_PTB_domain_containing_1
ENSMUSG00000020326	Ccng1	1.50386	1.68135	cyclin_G1	252.224	464.879	560.37	747.504	235.758	351.786	315.736	1.68135	0.588667	0.0134183	0.416545	chr11	-	40748552	40755311	3512	protein_coding	cyclin_G1
ENSMUSG00000049502	Dtx3l	1.50495	1.8523	deltex_3-like_E3_ubiquitin_ligase	25.5139	26.5862	22.3208	21.6042	8.80425	13.1621	16.9144	1.8523	0.589714	0.0330339	0.640742	chr16	-	35926511	35939151	5724	protein_coding	deltex_3-like_E3_ubiquitin_ligase
ENSMUSG00000029727	Cyp3a13	1.50522	1.88885	cytochrome_P450_family_3_subfamily_a_polypeptide_13	56.8597	24.3074	29.3695	85.3365	24.4563	25.1276	28.1907	1.88885	0.589976	0.0336328	0.645166	chr5	-	137892932	137921619	2956	protein_coding	cytochrome_P450_family_3_subfamily_a_polypeptide_13
ENSMUSG00000024925	Rnaseh2c	1.50658	1.62741	ribonuclease_H2_subunit_C	126.841	153.44	195.013	167.432	120.325	77.7758	98.1037	1.62741	0.591276	0.00398632	0.18748	chr19	+	5601873	5603439	1455	protein_coding	ribonuclease_H2_subunit_C
ENSMUSG00000026849	Tor1a	1.50698	1.64185	torsin_family_1_member_A_(torsin_A)	71.439	65.3261	78.7102	75.6146	35.217	52.6483	45.1052	1.64185	0.591661	0.00745818	0.287731	chr2	-	30960627	30967933	1995	protein_coding	torsin_family_1_member_A_(torsin_A)
ENSMUSG00000031016	Wee1	1.50788	1.82955	WEE_1_homolog_1_(S._pombe)	74.3549	58.4897	29.3695	88.5771	18.5868	52.6483	31.5736	1.82955	0.592523	0.0300387	0.613505	chr7	+	110122350	110142112	1941	protein_coding	WEE_1_homolog_1_(S._pombe)
ENSMUSG00000028884	Rpa2	1.50802	2.5813	replication_protein_A2	26.2429	15.9517	4.69912	15.1229	1.9565	4.78621	11.2763	2.5813	0.592652	0.0405516	0.709789	chr4	+	132768332	132778752	2993	protein_coding	replication_protein_A2
ENSMUSG00000049922	Slc35c1	1.50819	1.62473	solute_carrier_family_35_member_C1	96.224	86.5951	109.255	87.4969	63.5863	58.631	52.9986	1.62473	0.592817	0.0039437	0.18748	chr2	-	92452764	92460538	3275	protein_coding	solute_carrier_family_35_member_C1
ENSMUSG00000080848	Gm9385	1.50878	4.03138	predicted_pseudogene_9385	5.10279	9.11528	10.573	7.56146	4.89125	0	1.12763	4.03138	0.593383	0.0320381	0.633532	chr9	-	116040593	116041064	472	processed_pseudogene	predicted_pseudogene_9385
ENSMUSG00000017679	Ttpal	1.50987	1.71443	tocopherol_(alpha)_transfer_protein-like	67.7942	47.0956	62.2633	68.0531	37.1735	22.7345	47.3604	1.71443	0.594424	0.014682	0.43303	chr2	+	163602314	163619013	5951	protein_coding	tocopherol_(alpha)_transfer_protein-like
ENSMUSG00000005268	Prlr	1.51015	2.57305	prolactin_receptor	10.2056	9.11528	10.573	17.2833	6.84775	2.3931	4.51052	2.57305	0.594689	0.0408515	0.711892	chr15	+	10177238	10349180	15339	protein_coding	prolactin_receptor
ENSMUSG00000055884	Fancm	1.51105	1.80743	Fanconi_anemia_complementation_group_M	33.5326	32.6631	22.3208	27.0052	11.739	21.5379	14.6592	1.80743	0.595555	0.028079	0.593803	chr12	+	65075606	65132058	7775	protein_coding	Fanconi_anemia_complementation_group_M
ENSMUSG00000029591	Ung	1.5122	1.86793	uracil_DNA_glycosylase	34.9906	24.3074	23.4956	31.326	13.6955	9.57241	22.5526	1.86793	0.596651	0.0299712	0.613505	chr5	+	114130386	114139323	5468	protein_coding	uracil_DNA_glycosylase
ENSMUSG00000061758	Akr1b10	1.51465	2.22247	aldo-keto_reductase_family_1_member_B10_(aldose_reductase)	16.0373	13.6729	11.7478	16.2031	6.84775	3.58965	9.02103	2.22247	0.598989	0.0392795	0.702738	chr6	+	34384218	34396950	3535	protein_coding	aldo-keto_reductase_family_1_member_B10_(aldose_reductase)
ENSMUSG00000062397	Zfp706	1.51471	1.6024	zinc_finger_protein_706	775.624	698.078	1134.84	1052.12	534.125	524.089	655.152	1.6024	0.59904	0.00137228	0.0983282	chr15	-	36997031	37007402	4413	protein_coding	zinc_finger_protein_706
ENSMUSG00000034528	Hsd17b13	1.51495	1.61345	hydroxysteroid_(17-beta)_dehydrogenase_13	1577.49	1287.53	1870.25	2028.63	744.449	1274.33	1125.37	1.61345	0.599272	0.00231448	0.136197	chr5	-	103955440	103977410	2157	protein_coding	hydroxysteroid_(17-beta)_dehydrogenase_13
ENSMUSG00000025283	Sat1	1.51497	1.61994	spermidine/spermine_N1-acetyl_transferase_1	164.018	119.258	142.148	186.876	89.999	89.7414	103.742	1.61994	0.599286	0.00267391	0.146058	chrX	-	155213132	155216449	2774	protein_coding	spermidine/spermine_N1-acetyl_transferase_1
ENSMUSG00000074802	Gas2l3	1.51497	5.20841	growth_arrest-specific_2_like_3	2.91588	16.7113	4.69912	5.40104	1.9565	1.19655	1.12763	5.20841	0.599288	0.0246813	0.563001	chr10	-	89408823	89443967	6748	protein_coding	growth_arrest-specific_2_like_3
ENSMUSG00000029330	Cds1	1.51656	4.04368	CDP-diacylglycerol_synthase_1	5.10279	6.83646	16.4469	6.48125	1.9565	0	4.51052	4.04368	0.600798	0.0298628	0.613505	chr5	+	101765130	101823858	3939	protein_coding	CDP-diacylglycerol_synthase_1
ENSMUSG00000095597	Gm6472	1.5168	2.09267	predicted_pseudogene_6472	25.5139	172.431	37.5929	61.5719	27.391	41.8793	37.2117	2.09267	0.601031	0.0372988	0.685275	chrX	-	152909505	152910155	651	transcribed_processed_pseudogene	predicted_pseudogene_6472
ENSMUSG00000024682	Gif	1.51719	#DIV/0!	gastric_intrinsic_factor	6.56073	23.5478	2.34956	0	0	0	0	#DIV/0!	0.601399	0.0100215	0.349776	chr19	+	11747554	11763447	1537	protein_coding	gastric_intrinsic_factor
ENSMUSG00000045273	Cenph	1.5173	9.2944	centromere_protein_H	10.2056	8.35567	3.52434	2.16042	1.9565	0	0	9.2944	0.60151	0.017914	0.476442	chr13	-	100759674	100775899	1784	protein_coding	centromere_protein_H
ENSMUSG00000020914	Top2a	1.51884	2.38014	topoisomerase_(DNA)_II_alpha	16.7663	98.7488	24.6704	32.4063	33.2605	14.3586	6.76577	2.38014	0.602969	0.03849	0.694588	chr11	-	98992943	99024189	9013	protein_coding	topoisomerase_(DNA)_II_alpha
ENSMUSG00000041889	Shisa4	1.51971	1.68462	shisa_family_member_4	56.1307	53.932	56.3894	58.3313	28.3693	31.1103	40.5946	1.68462	0.6038	0.00923593	0.332849	chr1	-	135371057	135375237	2418	protein_coding	shisa_family_member_4
ENSMUSG00000068452	Duox2	1.52063	7.48976	dual_oxidase_2	104.972	6.07685	24.6704	32.4063	8.80425	2.3931	5.63814	7.48976	0.604665	0.0178564	0.476442	chr2	-	122279247	122298165	6403	protein_coding	dual_oxidase_2
ENSMUSG00000022881	Rfc4	1.52118	2.41453	replication_factor_C_(activator_1)_4	10.2056	17.4709	8.22346	25.925	2.93475	8.37586	7.8934	2.41453	0.605189	0.0377371	0.688136	chr16	-	23113943	23127737	1534	protein_coding	replication_factor_C_(activator_1)_4
ENSMUSG00000045284	Dcaf12l1	1.52181	5.35029	DDB1_and_CUL4_associated_factor_12-like_1	5.10279	8.35567	4.69912	5.40104	0.97825	1.19655	1.12763	5.35029	0.605789	0.0234193	0.544747	chrX	-	44786570	44790197	3531	protein_coding	DDB1_and_CUL4_associated_factor_12-like_1
ENSMUSG00000069515	Lyz1	1.52184	3.15434	lysozyme_1	15.3084	16.7113	4.69912	4.32083	3.913	3.58965	2.25526	3.15434	0.605819	0.0327975	0.640742	chr10	-	117287796	117292868	1264	protein_coding	lysozyme_1
ENSMUSG00000021377	Dek	1.52211	1.6907	DEK_oncogene_(DNA_binding)	88.9343	151.921	81.0598	138.267	49.8908	74.1862	80.0616	1.6907	0.606074	0.00998055	0.349348	chr13	-	47084775	47106201	3089	protein_coding	DEK_oncogene_(DNA_binding)
ENSMUSG00000076441	Ass1	1.52287	1.6325	argininosuccinate_synthetase_1	128.299	96.47	105.73	123.144	62.608	64.6138	81.1893	1.6325	0.606795	0.00293121	0.155877	chr2	+	31470207	31520672	2414	protein_coding	argininosuccinate_synthetase_1
ENSMUSG00000020865	Abcc3	1.52542	1.76056	ATP-binding_cassette_sub-family_C_(CFTR/MRP)_member_3	47.383	54.6917	45.8164	31.326	18.5868	23.931	33.8289	1.76056	0.609205	0.0175274	0.472349	chr11	-	94343295	94392997	5698	protein_coding	ATP-binding_cassette_sub-family_C_(CFTR/MRP)_member_3
ENSMUSG00000021707	Dhfr	1.52584	2.6437	dihydrofolate_reductase	18.2242	18.2306	3.52434	10.8021	3.913	5.98276	4.51052	2.6437	0.609608	0.0352333	0.663334	chr13	+	92354783	92389053	5290	protein_coding	dihydrofolate_reductase
ENSMUSG00000039236	Isg20	1.52615	1.66694	interferon-stimulated_protein	65.6073	75.201	76.3607	88.5771	42.0648	52.6483	42.8499	1.66694	0.609901	0.00525703	0.223901	chr7	+	78913424	78920396	1860	protein_coding	interferon-stimulated_protein
ENSMUSG00000071519	Prss3	1.52666	2.19463	protease_serine_3	8754.93	25555.4	16858.1	11657.6	11248.9	4729.97	5491.55	2.19463	0.610376	0.0353453	0.664415	chr6	-	41373814	41377678	822	protein_coding	protease_serine_3
ENSMUSG00000020380	Rad50	1.52765	1.74229	RAD50_homolog_(S._cerevisiae)	37.1775	56.2109	43.4668	50.7698	28.3693	28.7172	23.6802	1.74229	0.611309	0.0130377	0.410366	chr11	-	53649519	53707319	5375	protein_coding	RAD50_homolog_(S._cerevisiae)
ENSMUSG00000027995	Tlr2	1.52796	2.33742	toll-like_receptor_2	17.4953	17.4709	43.4668	8.64167	11.739	7.17931	9.02103	2.33742	0.611602	0.0355794	0.666323	chr3	-	83836272	83841767	3014	protein_coding	toll-like_receptor_2
ENSMUSG00000037737	Actrt3	1.52894	2.1312	actin_related_protein_T3	16.7663	14.4325	25.8452	38.8875	5.8695	14.3586	13.5315	2.1312	0.612536	0.0333985	0.644236	chr3	-	30597073	30599939	1961	protein_coding	actin_related_protein_T3
ENSMUSG00000040550	Otud6b	1.52935	1.6699	OTU_domain_containing_6B	99.8689	156.479	171.518	197.678	88.0425	99.3138	93.5932	1.6699	0.612914	0.00455149	0.205129	chr4	-	14809498	14826587	3387	protein_coding	OTU_domain_containing_6B
ENSMUSG00000087593	Gm16174	1.53028	3.98775	predicted_gene_16174	10.2056	8.35567	5.8739	4.32083	1.9565	1.19655	2.25526	3.98775	0.613798	0.0267476	0.576401	chr7	+	19816553	19818625	402	antisense	predicted_gene_16174
ENSMUSG00000028212	Ccne2	1.531	2.76916	cyclin_E2	10.2056	10.6345	9.39824	10.8021	1.9565	2.3931	6.76577	2.76916	0.614479	0.0336309	0.645166	chr4	+	11191351	11204779	3495	protein_coding	cyclin_E2
ENSMUSG00000027331	Knstrn	1.53323	3.90514	kinetochore-localized_astrin/SPAG5_binding	5.10279	28.1054	7.04868	4.32083	3.913	2.3931	2.25526	3.90514	0.616577	0.0262588	0.576401	chr2	+	118814003	118853957	5158	protein_coding	kinetochore-localized_astrin/SPAG5_binding
ENSMUSG00000027397	Slc20a1	1.53461	1.9244	solute_carrier_family_20_member_1	31.3457	20.5094	24.6704	38.8875	12.7173	11.9655	20.2973	1.9244	0.617869	0.0248144	0.563945	chr2	+	129198764	129211616	5580	protein_coding	solute_carrier_family_20_member_1
ENSMUSG00000043463	Rab9b	1.53485	5.09372	RAB9B_member_RAS_oncogene_family	3.64485	3.79803	12.9226	9.72188	0.97825	1.19655	2.25526	5.09372	0.618101	0.0225347	0.531967	chrX	-	136858147	136868755	3980	protein_coding	RAB9B_member_RAS_oncogene_family
ENSMUSG00000063229	Ldha	1.53612	1.65599	lactate_dehydrogenase_A	217.233	336.506	382.978	289.496	223.041	150.765	181.548	1.65599	0.619288	0.00236344	0.137184	chr7	+	46841475	46855627	2982	protein_coding	lactate_dehydrogenase_A
ENSMUSG00000025314	Ptprj	1.53618	1.63775	protein_tyrosine_phosphatase_receptor_type_J	328.036	420.822	363.007	230.084	180.976	224.952	208.611	1.63775	0.619351	0.00173382	0.114161	chr2	-	90429754	90580647	8352	protein_coding	protein_tyrosine_phosphatase_receptor_type_J
ENSMUSG00000026278	Bok	1.53878	1.64915	BCL2-related_ovarian_killer	111.532	104.066	121.002	96.1386	67.4993	71.7931	57.5091	1.64915	0.621786	0.00189327	0.119492	chr1	+	93685660	93695764	1840	protein_coding	BCL2-related_ovarian_killer
ENSMUSG00000001348	Acp5	1.53942	2.12474	acid_phosphatase_5_tartrate_resistant	21.8691	18.9902	29.3695	14.0427	14.6738	7.17931	7.8934	2.12474	0.622389	0.0295219	0.612618	chr9	-	22126731	22135746	1612	protein_coding	acid_phosphatase_5_tartrate_resistant
ENSMUSG00000035559	Mpv17l2	1.54	1.68108	MPV17_mitochondrial_membrane_protein-like_2	112.99	72.9222	116.303	104.78	60.6515	63.4172	57.5091	1.68108	0.622931	0.00376199	0.183299	chr8	-	70758649	70760921	955	protein_coding	MPV17_mitochondrial_membrane_protein-like_2
ENSMUSG00000027531	Impa1	1.54088	1.72135	inositol_(myo)-1(or_4)-monophosphatase_1	49.57	67.605	71.6616	59.4115	29.3475	37.0931	41.7223	1.72135	0.62375	0.00759734	0.288296	chr3	-	10311956	10331439	5437	protein_coding	inositol_(myo)-1(or_4)-monophosphatase_1
ENSMUSG00000056758	Hmga2	1.54158	#DIV/0!	high_mobility_group_AT-hook_2	1.45794	6.83646	5.8739	5.40104	0	0	0	#DIV/0!	0.62441	0.00906708	1	chr10	-	120361275	120476469	6772	protein_coding	high_mobility_group_AT-hook_2
ENSMUSG00000030316	Tamm41	1.54194	2.00361	TAM41_mitochondrial_translocator_assembly_and_maintenance_protein_homolog_(S._cerevisiae)	29.1588	25.8266	18.7965	14.0427	10.7608	11.9655	10.1487	2.00361	0.624746	0.0273056	0.582503	chr6	-	115004381	115037876	5276	protein_coding	TAM41_mitochondrial_translocator_assembly_and_maintenance_protein_homolog_(S._cerevisiae)
ENSMUSG00000031007	Atp6ap2	1.54222	1.72792	ATPase_H+_transporting_lysosomal_accessory_protein_2	155.271	180.786	294.87	330.544	107.608	130.424	179.293	1.72792	0.625007	0.00759451	0.288296	chrX	+	12587801	12617049	2618	protein_coding	ATPase_H+_transporting_lysosomal_accessory_protein_2
ENSMUSG00000037307	Banf2	1.54354	5.78382	barrier_to_autointegration_factor_2	2.91588	8.35567	9.39824	6.48125	0	2.3931	1.12763	5.78382	0.626241	0.0189803	0.489167	chr2	+	144033059	144073979	571	protein_coding	barrier_to_autointegration_factor_2
ENSMUSG00000027961	Lrrc39	1.54461	2.18306	leucine_rich_repeat_containing_39	13.8504	14.4325	24.6704	25.925	10.7608	9.57241	6.76577	2.18306	0.627247	0.028948	0.605868	chr3	+	116562973	116583134	5230	protein_coding	leucine_rich_repeat_containing_39
ENSMUSG00000033060	Lmo7	1.54478	1.75584	LIM_domain_only_7	56.1307	56.2109	38.7677	63.7323	36.1953	25.1276	30.446	1.75584	0.627398	0.00974365	0.342669	chr14	+	101729957	101934710	11951	protein_coding	LIM_domain_only_7
ENSMUSG00000020038	Cry1	1.54549	1.9285	cryptochrome_1_(photolyase-like)	48.112	32.6631	52.8651	85.3365	18.5868	20.3414	46.2328	1.9285	0.628064	0.0216119	0.521419	chr10	-	85131702	85185054	3014	protein_coding	cryptochrome_1_(photolyase-like)
ENSMUSG00000027018	Hat1	1.54643	1.85727	histone_aminotransferase_1	40.0933	29.6246	22.3208	35.6469	16.6303	19.1448	15.7868	1.85727	0.628944	0.01854	0.483587	chr2	+	71388958	71441622	2886	protein_coding	histone_aminotransferase_1
ENSMUSG00000031137	Fgf13	1.54793	#DIV/0!	fibroblast_growth_factor_13	8.01867	5.31724	3.52434	2.16042	0	0	0	#DIV/0!	0.630342	0.00861887	1	chrX	-	59062145	59568071	4019	protein_coding	fibroblast_growth_factor_13
ENSMUSG00000003824	Syce2	1.54978	3.67427	synaptonemal_complex_central_element_protein_2	6.56073	10.6345	7.04868	12.9625	1.9565	0	5.63814	3.67427	0.632066	0.0250132	0.565279	chr8	+	84872111	84888221	1968	protein_coding	synaptonemal_complex_central_element_protein_2
ENSMUSG00000040693	Slco4c1	1.5505	3.28346	solute_carrier_organic_anion_transporter_family_member_4C1	10.2056	7.59606	8.22346	10.8021	4.89125	2.3931	1.12763	3.28346	0.632729	0.0270757	0.580253	chr1	-	96816270	96872171	4908	protein_coding	solute_carrier_organic_anion_transporter_family_member_4C1
ENSMUSG00000002332	Dhrs1	1.55306	1.65037	dehydrogenase/reductase_(SDR_family)_member_1	244.205	293.968	344.21	221.443	150.651	161.534	189.442	1.65037	0.635115	0.000792896	0.062716	chr14	-	55739020	55745690	2760	protein_coding	dehydrogenase/reductase_(SDR_family)_member_1
ENSMUSG00000037466	4930427A07Rik	1.55331	9.50394	RIKEN_cDNA_4930427A07_gene	10.2056	6.83646	2.34956	5.40104	1.9565	0	0	9.50394	0.635346	0.0137789	0.422774	chr12	+	113156421	113166048	4299	protein_coding	RIKEN_cDNA_4930427A07_gene
ENSMUSG00000035266	Helq	1.55337	2.0068	helicase_POLQ-like	31.3457	16.7113	21.146	29.1656	8.80425	15.5552	12.4039	2.0068	0.635399	0.0236354	0.547122	chr5	-	100762145	100798598	5069	protein_coding	helicase_POLQ-like
ENSMUSG00000055652	Klhl25	1.55368	2.12556	kelch-like_25	18.9532	18.9902	16.4469	18.3635	4.89125	8.37586	12.4039	2.12556	0.635692	0.0267268	0.576401	chr7	+	75848310	75874131	3856	protein_coding	kelch-like_25
ENSMUSG00000025934	Gsta3	1.55386	2.84078	glutathione_S-transferase_alpha_3	328.036	76.7202	84.5841	294.897	52.8255	93.331	60.892	2.84078	0.635858	0.0279112	0.593345	chr1	+	21240589	21265661	4344	protein_coding	glutathione_S-transferase_alpha_3
ENSMUSG00000021311	Mtr	1.55586	1.94178	5-methyltetrahydrofolate-homocysteine_methyltransferase	24.785	25.8266	24.6704	37.8073	15.652	16.7517	11.2763	1.94178	0.637709	0.019142	0.489851	chr13	-	12186542	12258113	4482	protein_coding	5-methyltetrahydrofolate-homocysteine_methyltransferase
ENSMUSG00000018965	Ywhah	1.55661	1.66269	tyrosine_3-monooxygenase/tryptophan_5-monooxygenase_activation_protein_eta_polypeptide	163.289	136.729	142.148	144.748	106.629	82.562	75.5511	1.66269	0.638407	0.00093484	0.0723794	chr5	+	33018816	33027966	3709	protein_coding	tyrosine_3-monooxygenase/tryptophan_5-monooxygenase_activation_protein_eta_polypeptide
ENSMUSG00000028693	Nasp	1.55749	1.87415	nuclear_autoantigenic_sperm_protein_(histone-binding)	29.1588	48.6148	25.8452	46.449	20.5433	20.3414	19.1697	1.87415	0.639226	0.0158724	0.447551	chr4	-	116601052	116627941	7518	protein_coding	nuclear_autoantigenic_sperm_protein_(histone-binding)
ENSMUSG00000015342	Xk	1.56017	1.79391	Kell_blood_group_precursor_(McLeod_phenotype)_homolog	43.0092	44.8168	42.2921	36.7271	23.478	20.3414	25.9355	1.79391	0.641702	0.00963658	0.34123	chrX	+	9272756	9313250	5076	protein_coding	Kell_blood_group_precursor_(McLeod_phenotype)_homolog
ENSMUSG00000025747	Tyms	1.56128	1.98699	thymidylate_synthase	17.4953	32.6631	29.3695	35.6469	15.652	13.1621	14.6592	1.98699	0.642728	0.019385	0.490912	chr5	-	30058202	30073617	6089	protein_coding	thymidylate_synthase
ENSMUSG00000019715	Gle1	1.56135	1.69308	GLE1_RNA_export_mediator_(yeast)	86.0184	86.5951	84.5841	91.8177	52.8255	44.2724	57.5091	1.69308	0.642793	0.00198317	0.122625	chr2	+	29935426	29960371	6087	protein_coding	GLE1_RNA_export_mediator_(yeast)
ENSMUSG00000024927	Rela	1.56336	1.68104	v-rel_reticuloendotheliosis_viral_oncogene_homolog_A_(avian)	145.065	109.383	112.779	96.1386	68.4775	70.5965	67.6577	1.68104	0.644649	0.00168878	0.111799	chr19	+	5637483	5648130	2716	protein_coding	v-rel_reticuloendotheliosis_viral_oncogene_homolog_A_(avian)
ENSMUSG00000070476	Fam217b	1.56385	2.30589	family_with_sequence_similarity_217_member_B	21.8691	11.3941	19.9713	20.524	2.93475	13.1621	7.8934	2.30589	0.645098	0.0262826	0.576401	chr2	+	178414524	178424428	4559	protein_coding	family_with_sequence_similarity_217_member_B
ENSMUSG00000057897	Camk2b	1.56409	1.68802	calcium/calmodulin-dependent_protein_kinase_II_beta	500.802	533.244	553.321	442.885	430.43	220.165	251.461	1.68802	0.645324	0.0015026	0.104589	chr11	-	5969644	6066362	9125	protein_coding	calcium/calmodulin-dependent_protein_kinase_II_beta
ENSMUSG00000059326	Csf2ra	1.56497	2.37267	colony_stimulating_factor_2_receptor_alpha_low-affinity_(granulocyte-macrophage)	30.6167	22.7882	14.0974	7.56146	9.7825	7.17931	6.76577	2.37267	0.646133	0.0263872	0.576401	chr19	-	61224402	61228418	1849	protein_coding	colony_stimulating_factor_2_receptor_alpha_low-affinity_(granulocyte-macrophage)
ENSMUSG00000024542	Cep192	1.56668	1.88448	centrosomal_protein_192	31.3457	28.1054	29.3695	35.6469	14.6738	17.9483	16.9144	1.88448	0.647707	0.0140313	0.425164	chr18	+	67800107	67885168	8091	protein_coding	centrosomal_protein_192
ENSMUSG00000039483	Asb6	1.56702	1.73834	ankyrin_repeat_and_SOCS_box-containing_6	139.233	81.2779	102.206	103.7	78.26	53.8448	51.8709	1.73834	0.648028	0.0039835	0.18748	chr2	-	30823097	30830333	5439	protein_coding	ankyrin_repeat_and_SOCS_box-containing_6
ENSMUSG00000034457	Eda2r	1.56871	2.10351	ectodysplasin_A2_receptor	25.5139	21.269	17.6217	19.4438	13.6955	7.17931	9.02103	2.10351	0.649576	0.0217713	0.524005	chrX	-	97333840	97377216	5891	protein_coding	ectodysplasin_A2_receptor
ENSMUSG00000037251	Pomk	1.57552	1.96289	protein-O-mannose_kinase	27.7009	32.6631	34.0686	45.3688	23.478	10.769	19.1697	1.96289	0.655827	0.0143954	0.428809	chr8	-	25980604	25994121	3601	protein_coding	protein-O-mannose_kinase
ENSMUSG00000047502	Mroh7	1.57593	#DIV/0!	maestro_heat-like_repeat_family_member_7	13.1215	3.79803	2.34956	3.24063	0	0	0	#DIV/0!	0.656201	0.00671632	0.269117	chr4	-	106680417	106730925	4800	protein_coding	maestro_heat-like_repeat_family_member_7
ENSMUSG00000041126	H2afv	1.57606	1.77813	H2A_histone_family_member_V	87.4764	54.6917	52.8651	59.4115	28.3693	39.4862	39.467	1.77813	0.656327	0.0065588	0.267555	chr11	-	6427229	6444443	1633	protein_coding	H2A_histone_family_member_V
ENSMUSG00000078439	Smim24	1.57613	3.15246	small_integral_membrane_protein_24	225.252	47.0956	90.458	237.646	38.1518	75.3827	29.3183	3.15246	0.65639	0.0223509	0.531939	chr10	+	81393051	81395392	1058	protein_coding	small_integral_membrane_protein_24
ENSMUSG00000021208	Ifi27l2b	1.57656	2.5052	interferon_alpha-inducible_protein_27_like_2B	18.2242	9.11528	17.6217	12.9625	6.84775	5.98276	4.51052	2.5052	0.656776	0.024084	0.551443	chr12	-	103450898	103457223	1093	protein_coding	interferon_alpha-inducible_protein_27_like_2B
ENSMUSG00000030978	Rrm1	1.57679	2.00142	ribonucleotide_reductase_M1	29.8878	58.4897	22.3208	54.0104	15.652	16.7517	29.3183	2.00142	0.656993	0.0174977	0.472349	chr7	+	102441695	102469771	3997	protein_coding	ribonucleotide_reductase_M1
ENSMUSG00000037020	Wdr62	1.57946	5.9732	WD_repeat_domain_62	9.47661	5.31724	3.52434	9.72188	0	2.3931	1.12763	5.9732	0.659428	0.0142194	0.42767	chr7	-	30240138	30280419	5743	protein_coding	WD_repeat_domain_62
ENSMUSG00000028392	Bspry	1.57948	1.69587	B-box_and_SPRY_domain_containing	134.13	103.306	111.604	106.941	69.4558	63.4172	68.7854	1.69587	0.659451	0.000938835	0.0723794	chr4	+	62480053	62497298	2352	protein_coding	B-box_and_SPRY_domain_containing
ENSMUSG00000026605	Cenpf	1.58089	6.43146	centromere_protein_F	2.91588	29.6246	3.52434	9.72188	1.9565	0	3.38289	6.43146	0.660733	0.0132483	0.412729	chr1	-	189640606	189688086	15433	protein_coding	centromere_protein_F
ENSMUSG00000021636	Marveld2	1.58162	1.96562	MARVEL_(membrane-associating)_domain_containing_2	46.6541	42.538	38.7677	18.3635	19.565	22.7345	13.5315	1.96562	0.661407	0.015333	0.439128	chr13	-	100595957	100616971	3382	protein_coding	MARVEL_(membrane-associating)_domain_containing_2
ENSMUSG00000036249	Rbm43	1.58394	3.07536	RNA_binding_motif_protein_43	19.6822	9.87488	10.573	5.40104	2.93475	4.78621	3.38289	3.07536	0.663514	0.0214311	0.518991	chr2	-	51924448	51935163	2633	protein_coding	RNA_binding_motif_protein_43
ENSMUSG00000025856	Pdgfa	1.58618	1.72242	platelet_derived_growth_factor_alpha	164.747	103.306	156.246	124.224	69.4558	82.562	86.8274	1.72242	0.665553	0.00145289	0.102893	chr5	-	138976014	138997370	3119	protein_coding	platelet_derived_growth_factor_alpha
ENSMUSG00000027454	Gins1	1.58863	3.79599	GINS_complex_subunit_1_(Psf1_homolog)	16.0373	9.11528	2.34956	17.2833	2.93475	4.78621	1.12763	3.79599	0.66778	0.0181946	0.480755	chr2	+	150905400	150931280	1516	protein_coding	GINS_complex_subunit_1_(Psf1_homolog)
ENSMUSG00000027469	Tpx2	1.58904	9.13817	TPX2_microtubule-associated_protein_homolog_(Xenopus_laevis)	5.10279	32.6631	2.34956	7.56146	3.913	0	0	9.13817	0.668151	0.0102074	0.352227	chr2	+	152847964	152895321	4677	protein_coding	TPX2_microtubule-associated_protein_homolog_(Xenopus_laevis)
ENSMUSG00000021555	Naa35	1.59045	1.72081	N(alpha)-acetyltransferase_35_NatC_auxiliary_subunit	107.888	126.095	128.051	106.941	77.2818	72.9896	54.1262	1.72081	0.669438	0.000951965	0.0725685	chr13	+	59585259	59634798	5780	protein_coding	N(alpha)-acetyltransferase_35_NatC_auxiliary_subunit
ENSMUSG00000028961	Pgd	1.59143	1.75928	phosphogluconate_dehydrogenase	114.448	80.5183	119.828	74.5344	56.7385	56.2379	52.9986	1.75928	0.670324	0.00243844	0.138152	chr4	-	149149991	149166771	6447	protein_coding	phosphogluconate_dehydrogenase
ENSMUSG00000035811	Ugt2b35	1.59195	4.16265	UDP_glucuronosyltransferase_2_family_polypeptide_B35	4.37382	13.6729	11.7478	6.48125	1.9565	1.19655	3.38289	4.16265	0.670793	0.0170405	0.463837	chr5	+	87000860	87013275	3359	protein_coding	UDP_glucuronosyltransferase_2_family_polypeptide_B35
ENSMUSG00000029594	Rbm19	1.59271	1.73629	RNA_binding_motif_protein_19	115.906	99.5084	133.925	114.502	66.521	52.6483	81.1893	1.73629	0.671482	0.00120331	0.0882986	chr5	+	120116465	120198981	5280	protein_coding	RNA_binding_motif_protein_19
ENSMUSG00000020641	Rsad2	1.59347	2.37726	radical_S-adenosyl_methionine_domain_containing_2	19.6822	21.269	10.573	16.2031	4.89125	11.9655	4.51052	2.37726	0.672173	0.0206637	0.511594	chr12	-	26442753	26456452	4328	protein_coding	radical_S-adenosyl_methionine_domain_containing_2
ENSMUSG00000084957	Bbip1	1.59486	2.08028	BBSome_interacting_protein_1	24.785	36.4611	57.5642	73.4542	17.6085	16.7517	34.9565	2.08028	0.673431	0.0151853	0.438823	chr19	-	53929677	53944627	2488	protein_coding	BBSome_interacting_protein_1
ENSMUSG00000046879	Irgm1	1.59595	1.97071	immunity-related_GTPase_family_M_member_1	85.2895	40.2591	31.719	49.6896	22.4998	37.0931	19.1697	1.97071	0.674416	0.0128951	0.40931	chr11	-	48861968	48871683	5810	protein_coding	immunity-related_GTPase_family_M_member_1
ENSMUSG00000042029	Ncapg2	1.60119	2.69999	non-SMC_condensin_II_complex_subunit_G2	16.0373	47.0956	11.7478	20.524	14.6738	9.57241	2.25526	2.69999	0.679148	0.0197352	0.49566	chr12	+	116405402	116463531	6604	protein_coding	non-SMC_condensin_II_complex_subunit_G2
ENSMUSG00000062248	Cks2	1.60125	2.92619	CDC28_protein_kinase_regulatory_subunit_2	6.56073	23.5478	9.39824	17.2833	2.93475	5.98276	5.63814	2.92619	0.679196	0.0193211	0.490912	chr13	+	51645232	51650660	692	protein_coding	CDC28_protein_kinase_regulatory_subunit_2
ENSMUSG00000004788	Eif2b2	1.60454	1.69518	eukaryotic_translation_initiation_factor_2B_subunit_2_beta	354.279	289.41	276.073	337.025	165.324	166.321	224.398	1.69518	0.682157	0.000140852	0.0166575	chr12	+	85219481	85226628	1885	protein_coding	eukaryotic_translation_initiation_factor_2B_subunit_2_beta
ENSMUSG00000032802	Srxn1	1.60499	1.98113	sulfiredoxin_1_homolog_(S._cerevisiae)	37.1775	34.9419	56.3894	32.4063	19.565	13.1621	28.1907	1.98113	0.682565	0.0100883	0.351101	chr2	+	152105516	152111376	2820	protein_coding	sulfiredoxin_1_homolog_(S._cerevisiae)
ENSMUSG00000031239	Itm2a	1.60646	2.29487	integral_membrane_protein_2A	40.0933	40.2591	17.6217	15.1229	19.565	8.37586	9.02103	2.29487	0.683881	0.0174583	0.472349	chrX	-	107397099	107403376	1744	protein_coding	integral_membrane_protein_2A
ENSMUSG00000026417	Pigr	1.60788	2.06969	polymeric_immunoglobulin_receptor	49.57	30.3843	59.9138	19.4438	20.5433	19.1448	18.0421	2.06969	0.685162	0.0128819	0.40931	chr1	+	130826684	130852249	4025	protein_coding	polymeric_immunoglobulin_receptor
ENSMUSG00000038756	Ttll6	1.61199	3.99778	tubulin_tyrosine_ligase-like_family_member_6	10.9345	7.59606	9.39824	6.48125	2.93475	2.3931	1.12763	3.99778	0.68884	0.0151932	0.438823	chr11	+	96133786	96165451	3857	protein_coding	tubulin_tyrosine_ligase-like_family_member_6
ENSMUSG00000026227	2810459M11Rik	1.61313	6.09259	RIKEN_cDNA_2810459M11_gene	8.01867	5.31724	8.22346	6.48125	0	1.19655	2.25526	6.09259	0.689866	0.0112348	0.379089	chr1	+	86045863	86055456	3331	protein_coding	RIKEN_cDNA_2810459M11_gene
ENSMUSG00000021932	Rnaseh2b	1.61387	2.19015	ribonuclease_H2_subunit_B	18.2242	24.3074	17.6217	35.6469	10.7608	10.769	11.2763	2.19015	0.690527	0.0143898	0.428809	chr14	+	62292589	62372992	6243	protein_coding	ribonuclease_H2_subunit_B
ENSMUSG00000042834	Nrep	1.61465	1.91669	neuronal_regeneration_related_protein	38.6354	46.336	29.3695	42.1281	14.6738	25.1276	21.4249	1.91669	0.691223	0.00775141	0.29323	chr18	-	33437019	33464029	2513	protein_coding	neuronal_regeneration_related_protein
ENSMUSG00000042606	Hirip3	1.61617	2.16267	HIRA_interacting_protein_3	27.7009	30.3843	18.7965	19.4438	14.6738	11.9655	6.76577	2.16267	0.692577	0.0139427	0.424591	chr7	+	126861972	126865377	3265	protein_coding	HIRA_interacting_protein_3
ENSMUSG00000060288	Ppih	1.61855	2.62704	peptidyl_prolyl_isomerase_H	16.7663	11.3941	17.6217	20.524	10.7608	4.78621	3.38289	2.62704	0.694705	0.016897	0.461844	chr4	-	119300010	119320546	1894	protein_coding	peptidyl_prolyl_isomerase_H
ENSMUSG00000006585	Cdt1	1.62238	4.09102	chromatin_licensing_and_DNA_replication_factor_1	11.6635	18.9902	3.52434	7.56146	2.93475	3.58965	1.12763	4.09102	0.698108	0.0134733	0.416545	chr8	+	122568015	122573128	2189	protein_coding	chromatin_licensing_and_DNA_replication_factor_1
ENSMUSG00000064215	Ifi27	1.62303	1.7412	interferon_alpha-inducible_protein_27	823.007	502.1	758.908	771.269	500.864	381.7	347.31	1.7412	0.69869	0.000277947	0.0286394	chr12	+	103434211	103440239	1467	protein_coding	interferon_alpha-inducible_protein_27
ENSMUSG00000032501	Trib1	1.62312	1.97917	tribbles_homolog_1_(Drosophila)	106.43	61.5281	41.1173	59.4115	23.478	27.5207	50.7433	1.97917	0.698767	0.0086103	0.31591	chr15	+	59648350	59656550	5699	protein_coding	tribbles_homolog_1_(Drosophila)
ENSMUSG00000025978	Rftn2	1.6243	2.18178	raftlin_family_member_2	24.056	28.1054	56.3894	41.0479	24.4563	17.9483	9.02103	2.18178	0.69982	0.0120053	0.398464	chr1	-	55170159	55226782	5871	protein_coding	raftlin_family_member_2
ENSMUSG00000039231	Suv39h1	1.62445	3.34282	suppressor_of_variegation_3-9_homolog_1_(Drosophila)	12.3925	10.6345	7.04868	9.72188	1.9565	3.58965	3.38289	3.34282	0.699949	0.0152026	0.438823	chrX	-	8061171	8074760	5270	protein_coding	suppressor_of_variegation_3-9_homolog_1_(Drosophila)
ENSMUSG00000001123	Lgals9	1.62447	1.9637	lectin_galactose_binding_soluble_9	153.813	56.2109	84.5841	62.6521	43.043	35.8965	57.5091	1.9637	0.69997	0.00751083	0.287984	chr11	-	78962974	78984946	2137	protein_coding	lectin_galactose_binding_soluble_9
ENSMUSG00000027203	Dut	1.62477	1.9982	deoxyuridine_triphosphatase	37.9064	44.8168	23.4956	37.8073	13.6955	15.5552	24.8078	1.9982	0.700239	0.00901745	0.325939	chr2	+	125247190	125258608	2410	protein_coding	deoxyuridine_triphosphatase
ENSMUSG00000031546	Gins4	1.62792	1.93528	GINS_complex_subunit_4_(Sld5_homolog)	48.112	36.4611	30.5443	42.1281	15.652	22.7345	22.5526	1.93528	0.703027	0.00652775	0.267555	chr8	-	23226610	23237668	1364	protein_coding	GINS_complex_subunit_4_(Sld5_homolog)
ENSMUSG00000063445	Nmral1	1.62959	2.20864	NmrA-like_family_domain_containing_1	19.6822	35.7015	21.146	22.6844	5.8695	13.1621	14.6592	2.20864	0.704508	0.0129717	0.409349	chr16	-	4710059	4719356	3891	protein_coding	NmrA-like_family_domain_containing_1
ENSMUSG00000040181	Fmo1	1.63019	2.14135	flavin_containing_monooxygenase_1	40.8223	31.1439	14.0974	41.0479	16.6303	14.3586	13.5315	2.14135	0.705044	0.0114403	0.384957	chr1	-	162829561	162866610	6304	protein_coding	flavin_containing_monooxygenase_1
ENSMUSG00000026202	Tuba4a	1.63084	1.75387	tubulin_alpha_4A	342.616	246.872	386.502	333.784	213.259	148.372	198.463	1.75387	0.705617	0.000237045	0.0248917	chr1	-	75214228	75219865	3701	protein_coding	tubulin_alpha_4A
ENSMUSG00000027227	Sord	1.63138	1.86911	sorbitol_dehydrogenase	939.642	318.275	408.823	613.558	323.801	299.138	292.056	1.86911	0.706095	0.00324159	0.163472	chr2	+	122234749	122265340	2352	protein_coding	sorbitol_dehydrogenase
ENSMUSG00000057716	Tmem178b	1.63372	2.95457	transmembrane_protein_178B	10.2056	17.4709	14.0974	9.72188	3.913	2.3931	6.76577	2.95457	0.708157	0.0149831	0.438724	chr6	+	39873271	40255150	9729	protein_coding	transmembrane_protein_178B
ENSMUSG00000028832	Stmn1	1.6359	3.04662	stathmin_1	21.8691	55.4513	7.04868	21.6042	14.6738	2.3931	9.02103	3.04662	0.710081	0.0145383	0.429833	chr4	+	134468320	134473843	1922	protein_coding	stathmin_1
ENSMUSG00000026622	Nek2	1.63652	8.59078	NIMA_(never_in_mitosis_gene_a)-related_expressed_kinase_2	8.74764	31.9035	2.34956	4.32083	2.93475	1.19655	0	8.59078	0.710631	0.00738735	0.287731	chr1	+	191821444	191833050	4516	protein_coding	NIMA_(never_in_mitosis_gene_a)-related_expressed_kinase_2
ENSMUSG00000030060	Hmces	1.64087	2.60677	5-hydroxymethylcytosine_(hmC)_binding_ES_cell_specific	21.1401	15.1921	23.4956	11.8823	8.80425	9.57241	2.25526	2.60677	0.714459	0.0139338	0.424591	chr6	+	87913935	87936629	2445	protein_coding	5-hydroxymethylcytosine_(hmC)_binding_ES_cell_specific
ENSMUSG00000046598	Bdh1	1.64211	2.76233	3-hydroxybutyrate_dehydrogenase_type_1	8.01867	20.5094	38.7677	27.0052	12.7173	8.37586	4.51052	2.76233	0.71555	0.0139801	0.424668	chr16	+	31422280	31458901	3800	protein_coding	3-hydroxybutyrate_dehydrogenase_type_1
ENSMUSG00000053219	Raet1e	1.64311	2.3993	retinoic_acid_early_transcript_1E	21.1401	20.5094	21.146	31.326	2.93475	9.57241	16.9144	2.3993	0.716425	0.0128401	0.40931	chr10	+	22158569	22374139	2159	protein_coding	retinoic_acid_early_transcript_1E
ENSMUSG00000022949	Clic6	1.64342	1.82648	chloride_intracellular_channel_6	86.0184	79.7587	69.312	108.021	48.9125	50.2552	41.7223	1.82648	0.716705	0.00114091	0.0847404	chr16	+	92485736	92541243	3914	protein_coding	chloride_intracellular_channel_6
ENSMUSG00000044934	Zfp367	1.64623	2.18198	zinc_finger_protein_367	32.0747	34.9419	16.4469	23.7646	14.6738	13.1621	9.02103	2.18198	0.719166	0.0101473	0.351148	chr13	-	64133022	64153202	5454	protein_coding	zinc_finger_protein_367
ENSMUSG00000034349	Smc4	1.6464	2.175	structural_maintenance_of_chromosomes_4	40.0933	94.9508	28.1947	55.0906	16.6303	39.4862	19.1697	2.175	0.719315	0.0101336	0.351148	chr3	+	69004738	69034623	5210	protein_coding	structural_maintenance_of_chromosomes_4
ENSMUSG00000047586	Nccrp1	1.6471	2.96016	non-specific_cytotoxic_cell_receptor_protein_1_homolog_(zebrafish)	10.2056	9.11528	31.719	19.4438	3.913	7.17931	6.76577	2.96016	0.719928	0.0134581	0.416545	chr7	-	28543596	28547254	1531	protein_coding	non-specific_cytotoxic_cell_receptor_protein_1_homolog_(zebrafish)
ENSMUSG00000007080	Pole	1.65061	6.93054	polymerase_(DNA_directed)_epsilon	9.47661	9.11528	3.52434	14.0427	3.913	0	0	6.93054	0.723	0.00805361	0.301849	chr5	+	110286306	110337474	11160	protein_coding	polymerase_(DNA_directed)_epsilon
ENSMUSG00000024642	Tle4	1.65326	2.48494	transducin-like_enhancer_of_split_4_homolog_of_Drosophila_E(spl)	21.8691	20.5094	18.7965	20.524	6.84775	15.5552	2.25526	2.48494	0.725316	0.0121421	0.398667	chr19	-	14448072	14598051	4640	protein_coding	transducin-like_enhancer_of_split_4_homolog_of_Drosophila_E(spl)
ENSMUSG00000061559	Wdr61	1.65406	1.82736	WD_repeat_domain_61	115.177	101.787	151.547	147.989	53.8038	83.7586	74.4235	1.82736	0.726009	0.000725883	0.0585132	chr9	-	54714735	54734519	4669	protein_coding	WD_repeat_domain_61
ENSMUSG00000004558	Ndrg2	1.6552	1.85918	N-myc_downstream_regulated_gene_2	82.3736	94.9508	54.0399	75.6146	41.0865	46.6655	36.0841	1.85918	0.727006	0.00165113	0.110508	chr14	-	51905271	51913488	2157	protein_coding	N-myc_downstream_regulated_gene_2
ENSMUSG00000017499	Cdc6	1.65574	7.48609	cell_division_cycle_6	18.2242	15.1921	0	10.8021	0.97825	1.19655	2.25526	7.48609	0.727478	0.00692905	0.275197	chr11	+	98907801	98923940	5229	protein_coding	cell_division_cycle_6
ENSMUSG00000037370	Enpp1	1.65579	1.89798	ectonucleotide_pyrophosphatase/phosphodiesterase_1	65.6073	111.662	108.08	66.9729	47.9343	38.2896	52.9986	1.89798	0.727518	0.00207285	0.127522	chr10	-	24637914	24712159	10257	protein_coding	ectonucleotide_pyrophosphatase/phosphodiesterase_1
ENSMUSG00000025153	Fasn	1.65871	1.77176	fatty_acid_synthase	279.195	278.016	280.772	281.934	197.607	120.852	155.613	1.77176	0.730059	6.13e-05	0.0083021	chr11	-	120805846	120824547	10947	protein_coding	fatty_acid_synthase
ENSMUSG00000004891	Nes	1.66195	1.74788	nestin	597.026	471.715	609.711	488.254	328.692	274.01	327.012	1.74788	0.732878	9.38e-06	0.00183757	chr3	+	87971078	87980451	6416	protein_coding	nestin
ENSMUSG00000031146	Plp2	1.66309	1.95336	proteolipid_protein_2	38.6354	55.4513	62.2633	47.5292	22.4998	28.7172	27.0631	1.95336	0.733865	0.00294028	0.155877	chrX	-	7667941	7671390	1334	protein_coding	proteolipid_protein_2
ENSMUSG00000046027	Stard5	1.66351	1.94564	StAR-related_lipid_transfer_(START)_domain_containing_5	56.1307	52.4128	39.9425	38.8875	22.4998	21.5379	28.1907	1.94564	0.73423	0.00323936	0.163472	chr7	+	83631959	83653127	5460	protein_coding	StAR-related_lipid_transfer_(START)_domain_containing_5
ENSMUSG00000020290	Xpo1	1.66408	1.88067	exportin_1_CRM1_homolog_(yeast)	62.6914	78.9991	76.3607	82.0958	48.9125	34.7	36.0841	1.88067	0.734722	0.00107164	0.0805777	chr11	+	23256041	23298249	7181	protein_coding	exportin_1_CRM1_homolog_(yeast)
ENSMUSG00000022034	Esco2	1.66587	7.95062	establishment_of_sister_chromatid_cohesion_N-acetyltransferase_2	2.91588	12.9133	8.22346	8.64167	1.9565	0	1.12763	7.95062	0.736276	0.00663536	0.267555	chr14	-	65819038	65833994	4010	protein_coding	establishment_of_sister_chromatid_cohesion_N-acetyltransferase_2
ENSMUSG00000022696	Sidt1	1.66629	5.07093	SID1_transmembrane_family_member_1	11.6635	5.31724	9.39824	9.72188	1.9565	0	3.38289	5.07093	0.736639	0.00875133	0.32012	chr16	-	44240180	44333196	5623	protein_coding	SID1_transmembrane_family_member_1
ENSMUSG00000029730	Mcm7	1.66735	1.97649	minichromosome_maintenance_deficient_7_(S._cerevisiae)	74.3549	50.8936	34.0686	50.7698	27.391	27.5207	24.8078	1.97649	0.737554	0.00370808	0.18213	chr5	-	138164583	138172422	4426	protein_coding	minichromosome_maintenance_deficient_7_(S._cerevisiae)
ENSMUSG00000022843	Clcn2	1.66747	2.22148	chloride_channel_voltage-sensitive_2	89.6633	38.7399	28.1947	36.7271	29.3475	16.7517	19.1697	2.22148	0.737659	0.00817376	0.304044	chr16	-	20702964	20717746	6022	protein_coding	chloride_channel_voltage-sensitive_2
ENSMUSG00000070462	Mesdc1	1.66857	1.98753	mesoderm_development_candidate_1	88.9343	52.4128	56.3894	60.4917	41.0865	19.1448	37.2117	1.98753	0.738609	0.0033478	0.167129	chr7	-	83879873	83884305	4433	protein_coding	mesoderm_development_candidate_1
ENSMUSG00000025413	Ttc4	1.67169	1.9195	tetratricopeptide_repeat_domain_4	95.4951	58.4897	79.885	61.5719	43.043	43.0758	29.3183	1.9195	0.741309	0.001781	0.116387	chr4	-	106662256	106678944	3568	protein_coding	tetratricopeptide_repeat_domain_4
ENSMUSG00000040296	Ddx58	1.67497	2.41313	DEAD_(Asp-Glu-Ala-Asp)_box_polypeptide_58	53.2148	15.9517	30.5443	22.6844	7.826	15.5552	14.6592	2.41313	0.744139	0.0094192	0.337457	chr4	-	40203773	40239828	7050	protein_coding	DEAD_(Asp-Glu-Ala-Asp)_box_polypeptide_58
ENSMUSG00000024197	Plin3	1.67529	1.82394	perilipin_3	158.186	253.708	269.025	253.849	121.303	123.245	139.826	1.82394	0.744409	0.00020395	0.0225847	chr17	-	56278962	56290511	2159	protein_coding	perilipin_3
ENSMUSG00000031647	Mfap3l	1.67816	3.06411	microfibrillar-associated_protein_3-like	9.47661	9.87488	21.146	22.6844	3.913	4.78621	6.76577	3.06411	0.746881	0.0103596	0.355466	chr8	+	60632827	60676729	6837	protein_coding	microfibrillar-associated_protein_3-like
ENSMUSG00000006941	Eif1b	1.67861	1.99914	eukaryotic_translation_initiation_factor_1B	51.0279	53.1724	93.9824	62.6521	33.2605	25.1276	39.467	1.99914	0.747265	0.00254056	0.140666	chr9	+	120492606	120495327	917	protein_coding	eukaryotic_translation_initiation_factor_1B
ENSMUSG00000045775	Slc16a5	1.68007	1.86663	solute_carrier_family_16_(monocarboxylic_acid_transporters)_member_5	86.0184	97.2296	93.9824	82.0958	38.1518	43.0758	63.1472	1.86663	0.748525	0.000641564	0.0535267	chr11	+	115462474	115474398	3699	protein_coding	solute_carrier_family_16_(monocarboxylic_acid_transporters)_member_5
ENSMUSG00000017774	Myo1c	1.68331	1.7676	myosin_IC	250.037	287.131	257.277	260.33	138.912	150.765	157.868	1.7676	0.751304	5.04e-06	0.00111621	chr11	+	75650504	75673910	6585	protein_coding	myosin_IC
ENSMUSG00000075585	6330403L08Rik	1.68582	3.15976	RIKEN_cDNA_6330403L08_gene	13.8504	20.5094	15.2721	8.64167	5.8695	1.19655	6.76577	3.15976	0.753449	0.00966541	0.341259	chr5	+	138995056	139000577	5522	antisense	RIKEN_cDNA_6330403L08_gene
ENSMUSG00000060613	Cyp2c70	1.69843	18.6982	cytochrome_P450_family_2_subfamily_c_polypeptide_70	2.91588	6.07685	9.39824	9.72188	0	0	1.12763	18.6982	0.764206	0.00357523	0.176909	chr19	-	40153353	40187333	1981	protein_coding	cytochrome_P450_family_2_subfamily_c_polypeptide_70
ENSMUSG00000027520	Zdbf2	1.7007	18.9092	zinc_finger_DBF-type_containing_2	5.83176	13.6729	3.52434	5.40104	0	0	1.12763	18.9092	0.766131	0.0034099	0.169535	chr1	+	63273265	63314576	12659	protein_coding	zinc_finger_DBF-type_containing_2
ENSMUSG00000062054	Iah1	1.70073	1.8554	isoamyl_acetate-hydrolyzing_esterase_1_homolog	112.99	117.739	145.673	131.785	74.347	63.4172	67.6577	1.8554	0.766157	9.95e-05	0.0126276	chr12	+	21316392	21323605	924	protein_coding	isoamyl_acetate-hydrolyzing_esterase_1_homolog
ENSMUSG00000027715	Ccna2	1.70171	5.41868	cyclin_A2	5.10279	34.1823	4.69912	11.8823	1.9565	2.3931	3.38289	5.41868	0.766981	0.0061251	0.255513	chr3	-	36564865	36572150	4083	protein_coding	cyclin_A2
ENSMUSG00000061186	Sfmbt2	1.70251	#DIV/0!	Scm-like_with_four_mbt_domains_2	2.91588	9.87488	3.52434	9.72188	0	0	0	#DIV/0!	0.767665	0.00246632	0.138443	chr2	+	10370510	10595253	9128	protein_coding	Scm-like_with_four_mbt_domains_2
ENSMUSG00000062300	Pvrl2	1.70652	1.9385	poliovirus_receptor-related_2	165.476	132.931	159.77	95.0583	96.8468	57.4345	59.7643	1.9385	0.771053	0.000687605	0.0562128	chr7	-	19716644	19750483	3494	protein_coding	poliovirus_receptor-related_2
ENSMUSG00000042246	Tmc7	1.70677	2.86055	transmembrane_channel-like_gene_family_7	29.8878	9.87488	15.2721	19.4438	6.84775	4.78621	7.8934	2.86055	0.771265	0.00801101	0.301179	chr7	-	118535841	118584736	5763	protein_coding	transmembrane_channel-like_gene_family_7
ENSMUSG00000035293	G2e3	1.71157	2.27062	G2/M-phase_specific_E3_ubiquitin_ligase	87.4764	94.9508	22.3208	64.8125	23.478	41.8793	23.6802	2.27062	0.775324	0.00516662	0.223172	chr12	+	51348061	51376986	7886	protein_coding	G2/M-phase_specific_E3_ubiquitin_ligase
ENSMUSG00000040033	Stat2	1.71577	2.28982	signal_transducer_and_activator_of_transcription_2	142.149	66.0857	48.166	51.85	46.956	37.0931	16.9144	2.28982	0.778853	0.00490253	0.214042	chr10	+	128270576	128292849	4397	protein_coding	signal_transducer_and_activator_of_transcription_2
ENSMUSG00000020739	Nup85	1.72213	2.16697	nucleoporin_85	99.8689	65.3261	39.9425	74.5344	39.13	41.8793	15.7868	2.16697	0.784196	0.00319133	0.163472	chr11	+	115564434	115583985	3385	protein_coding	nucleoporin_85
ENSMUSG00000030246	Ldhb	1.72411	2.64155	lactate_dehydrogenase_B	24.785	22.7882	59.9138	16.2031	11.739	14.3586	9.02103	2.64155	0.785853	0.00625198	0.259032	chr6	-	142490249	142507957	1570	protein_coding	lactate_dehydrogenase_B
ENSMUSG00000031775	Pllp	1.72802	3.66613	plasma_membrane_proteolipid	12.3925	9.11528	18.7965	12.9625	2.93475	1.19655	6.76577	3.66613	0.789122	0.00658552	0.267555	chr8	-	94674895	94696242	1889	protein_coding	plasma_membrane_proteolipid
ENSMUSG00000035283	Adrb1	1.72952	3.06929	adrenergic_receptor_beta_1	10.9345	19.7498	18.7965	14.0427	4.89125	8.37586	2.25526	3.06929	0.790368	0.00665538	0.267555	chr19	+	56722372	56724862	2491	protein_coding	adrenergic_receptor_beta_1
ENSMUSG00000037972	Snn	1.73068	2.41247	stannin	29.8878	24.3074	32.8938	30.2458	17.6085	14.3586	4.51052	2.41247	0.791342	0.00460465	0.205129	chr16	+	11066298	11074983	2902	protein_coding	stannin
ENSMUSG00000020911	Krt19	1.73273	1.95833	keratin_19	123.925	91.9124	173.867	152.309	58.695	78.9724	69.913	1.95833	0.793051	0.000353764	0.0347516	chr11	-	100140810	100148665	1855	protein_coding	keratin_19
ENSMUSG00000026600	Soat1	1.73289	2.15991	sterol_O-acyltransferase_1	51.0279	63.8069	74.0111	31.326	23.478	19.1448	33.8289	2.15991	0.793178	0.00242171	0.137845	chr1	-	156424525	156474331	9791	protein_coding	sterol_O-acyltransferase_1
ENSMUSG00000021125	Arg2	1.73331	2.21579	arginase_type_II	24.785	56.2109	42.2921	41.0479	19.565	19.1448	16.9144	2.21579	0.793529	0.00294325	0.155877	chr12	+	79130777	79156301	1428	protein_coding	arginase_type_II
ENSMUSG00000028541	B4galt2	1.73726	2.39435	UDP-Gal:betaGlcNAc_beta_14-_galactosyltransferase_polypeptide_2	47.383	36.4611	25.8452	21.6042	17.6085	16.7517	6.76577	2.39435	0.796812	0.00445719	0.204109	chr4	-	117869260	117883487	5031	protein_coding	UDP-Gal:betaGlcNAc_beta_14-_galactosyltransferase_polypeptide_2
ENSMUSG00000056854	Pou3f4	1.74018	7.12053	POU_domain_class_3_transcription_factor_4	5.83176	10.6345	9.39824	7.56146	0	2.3931	1.12763	7.12053	0.799234	0.00394175	0.18748	chrX	+	110814280	110817207	2928	protein_coding	POU_domain_class_3_transcription_factor_4
ENSMUSG00000037031	Tspan15	1.74174	2.14451	tetraspanin_15	37.1775	44.8168	31.719	38.8875	19.565	19.1448	14.6592	2.14451	0.800532	0.00196052	0.121843	chr10	-	62185396	62231218	3605	protein_coding	tetraspanin_15
ENSMUSG00000102112	1810041H14Rik	1.74286	3.06972	RIKEN_cDNA_1810041H14_gene	12.3925	16.7113	22.3208	14.0427	7.826	4.78621	3.38289	3.06972	0.801459	0.00585982	0.246133	chr14	-	121876725	121879409	851	antisense	RIKEN_cDNA_1810041H14_gene
ENSMUSG00000025001	Hells	1.74597	4.81896	helicase_lymphoid_specific	14.5794	16.7113	3.52434	24.8448	0.97825	7.17931	1.12763	4.81896	0.80403	0.00474324	0.208583	chr19	+	38930915	38971051	7205	protein_coding	helicase_lymphoid_specific
ENSMUSG00000041323	Ak7	1.74725	3.72288	adenylate_kinase_7	10.9345	11.3941	16.4469	10.8021	1.9565	2.3931	5.63814	3.72288	0.805083	0.00557713	0.235886	chr12	+	105705982	105782447	3093	protein_coding	adenylate_kinase_7
ENSMUSG00000006398	Cdc20	1.74946	7.16198	cell_division_cycle_20	8.01867	34.9419	5.8739	8.64167	4.89125	0	1.12763	7.16198	0.806906	0.00358727	0.176909	chr4	-	118432901	118437352	1868	protein_coding	cell_division_cycle_20
ENSMUSG00000026955	Sapcd2	1.74981	3.52751	suppressor_APC_domain_containing_2	13.1215	19.7498	11.7478	10.8021	5.8695	4.78621	1.12763	3.52751	0.807198	0.00554078	0.235164	chr2	+	25372321	25378213	3499	protein_coding	suppressor_APC_domain_containing_2
ENSMUSG00000058258	Idi1	1.7519	2.47024	isopentenyl-diphosphate_delta_isomerase	16.0373	31.9035	29.3695	32.4063	8.80425	14.3586	10.1487	2.47024	0.808923	0.00397166	0.18748	chr13	+	8885501	8892451	3505	protein_coding	isopentenyl-diphosphate_delta_isomerase
ENSMUSG00000036854	Hspb6	1.75433	2.20804	heat_shock_protein_alpha-crystallin-related_B6	29.1588	42.538	51.6903	39.9677	19.565	16.7517	19.1697	2.20804	0.810922	0.00181982	0.117287	chr7	+	30552178	30555443	2299	protein_coding	heat_shock_protein_alpha-crystallin-related_B6
ENSMUSG00000037474	Dtl	1.75441	5.37451	denticleless_E3_ubiquitin_protein_ligase	13.8504	19.7498	3.52434	8.64167	2.93475	1.19655	2.25526	5.37451	0.81099	0.00420789	0.195635	chr1	-	191537356	191575544	13709	protein_coding	denticleless_E3_ubiquitin_protein_ligase
ENSMUSG00000028463	Car9	1.76333	3.12056	carbonic_anhydrase_9	13.1215	29.6246	44.6416	24.8448	17.6085	5.98276	3.38289	3.12056	0.818301	0.00489145	0.214042	chr4	+	43506966	43513729	2304	protein_coding	carbonic_anhydrase_9
ENSMUSG00000052684	Jun	1.76337	2.41896	jun_proto-oncogene	210.672	77.4798	83.4093	60.4917	71.4123	28.7172	33.8289	2.41896	0.818337	0.00323397	0.163472	chr4	-	95049034	95052222	3189	protein_coding	jun_proto-oncogene
ENSMUSG00000067377	Tspan6	1.77062	3.68425	tetraspanin_6	9.47661	13.6729	22.3208	16.2031	6.84775	1.19655	4.51052	3.68425	0.824256	0.00464447	0.205725	chrX	-	133891068	133898429	2060	protein_coding	tetraspanin_6
ENSMUSG00000023832	Acat2	1.77126	2.52888	acetyl-Coenzyme_A_acetyltransferase_2	25.5139	22.7882	21.146	39.9677	11.739	7.17931	13.5315	2.52888	0.824773	0.00327664	0.16425	chr17	-	12942890	12960747	2544	protein_coding	acetyl-Coenzyme_A_acetyltransferase_2
ENSMUSG00000023909	Paqr4	1.77195	3.2392	progestin_and_adipoQ_receptor_family_member_IV	28.4298	20.5094	15.2721	8.64167	3.913	9.57241	3.38289	3.2392	0.825342	0.00461417	0.205129	chr17	-	23736186	23740330	2507	protein_coding	progestin_and_adipoQ_receptor_family_member_IV
ENSMUSG00000037572	Wdhd1	1.79453	3.70306	WD_repeat_and_HMG-box_DNA_binding_protein_1	15.3084	12.1537	9.39824	17.2833	2.93475	2.3931	5.63814	3.70306	0.843603	0.00375848	0.183299	chr14	-	47240944	47276857	7192	protein_coding	WD_repeat_and_HMG-box_DNA_binding_protein_1
ENSMUSG00000032113	Chek1	1.80954	4.61615	checkpoint_kinase_1	17.4953	17.4709	3.52434	15.1229	2.93475	2.3931	3.38289	4.61615	0.855623	0.00300325	0.157684	chr9	-	36708482	36727065	4635	protein_coding	checkpoint_kinase_1
ENSMUSG00000041801	Phlda3	1.82914	2.9434	pleckstrin_homology-like_domain_family_A_member_3	36.4485	23.5478	17.6217	22.6844	10.7608	2.3931	12.4039	2.9434	0.871166	0.00246529	0.138443	chr1	+	135766119	135769136	1559	protein_coding	pleckstrin_homology-like_domain_family_A_member_3
ENSMUSG00000001228	Uhrf1	1.83731	5.49184	ubiquitin-like_containing_PHD_and_RING_finger_domains_1	20.4112	33.4227	4.69912	9.72188	5.8695	1.19655	2.25526	5.49184	0.877596	0.00215795	0.130368	chr17	+	56303321	56323486	4259	protein_coding	ubiquitin-like_containing_PHD_and_RING_finger_domains_1
ENSMUSG00000068101	Cenpm	1.83896	5.45678	centromere_protein_M	8.01867	20.5094	8.22346	10.8021	1.9565	1.19655	3.38289	5.45678	0.878888	0.00217262	0.130368	chr15	-	82233779	82244747	1201	protein_coding	centromere_protein_M
ENSMUSG00000029363	Rfc5	1.83992	2.62239	replication_factor_C_(activator_1)_5	27.7009	37.9803	16.4469	37.8073	8.80425	11.9655	13.5315	2.62239	0.879647	0.00167758	0.111664	chr5	-	117378103	117389047	4669	protein_coding	replication_factor_C_(activator_1)_5
ENSMUSG00000042699	Dhx9	1.84129	2.01508	DEAH_(Asp-Glu-Ala-His)_box_polypeptide_9	211.401	303.843	263.151	355.389	128.151	148.372	145.464	2.01508	0.88072	5.67e-06	0.00121116	chr1	-	153455758	153487660	9603	protein_coding	DEAH_(Asp-Glu-Ala-His)_box_polypeptide_9
ENSMUSG00000020656	Grhl1	1.84735	3.82163	grainyhead-like_1_(Drosophila)	15.3084	15.1921	10.573	14.0427	3.913	2.3931	4.51052	3.82163	0.885455	0.00237055	0.137184	chr12	+	24572287	24617391	3500	protein_coding	grainyhead-like_1_(Drosophila)
ENSMUSG00000027323	Rad51	1.84913	3.04512	RAD51_homolog	22.5981	22.7882	12.9226	17.2833	5.8695	5.98276	6.76577	3.04512	0.886843	0.00212431	0.130031	chr2	+	119112793	119147445	6649	protein_coding	RAD51_homolog
ENSMUSG00000037185	Krt80	1.85757	3.76743	keratin_80	58.3176	8.35567	34.0686	30.2458	15.652	4.78621	5.63814	3.76743	0.893415	0.00216623	0.130368	chr15	-	101349571	101370125	1774	protein_coding	keratin_80
ENSMUSG00000040969	Arhgef38	1.86011	2.71793	Rho_guanine_nucleotide_exchange_factor_(GEF)_38	23.327	28.1054	30.5443	21.6042	9.7825	13.1621	5.63814	2.71793	0.895389	0.00141222	0.100598	chr3	-	133112278	133234949	8190	protein_coding	Rho_guanine_nucleotide_exchange_factor_(GEF)_38
ENSMUSG00000042359	Osbpl6	1.8615	3.22321	oxysterol_binding_protein-like_6	23.327	12.1537	16.4469	28.0854	5.8695	5.98276	6.76577	3.22321	0.896463	0.00195538	0.121843	chr2	+	76406508	76600647	10063	protein_coding	oxysterol_binding_protein-like_6
ENSMUSG00000022474	Pmm1	1.86386	2.80861	phosphomannomutase_1	28.4298	24.3074	21.146	21.6042	7.826	13.1621	4.51052	2.80861	0.898295	0.00155397	0.106943	chr15	-	81951108	81960930	2776	protein_coding	phosphomannomutase_1
ENSMUSG00000021270	Hsp90aa1	1.87529	2.19484	heat_shock_protein_90_alpha_(cytosolic)_class_A_member_1	387.083	721.626	830.569	960.305	250.432	305.121	435.265	2.19484	0.907113	9.18e-05	0.0117935	chr12	-	110690605	110702728	3931	protein_coding	heat_shock_protein_90_alpha_(cytosolic)_class_A_member_1
ENSMUSG00000029149	Krtcap3	1.88383	2.50464	keratinocyte_associated_protein_3	56.1307	30.3843	39.9425	42.1281	20.5433	10.769	19.1697	2.50464	0.91367	0.000603117	0.0516678	chr5	+	31251691	31253202	1338	protein_coding	keratinocyte_associated_protein_3
ENSMUSG00000071521	Try10	1.88493	2.27936	trypsin_10	3577.06	8287.3	13064.7	10489.9	3549.09	3852.9	4252.29	2.27936	0.914512	0.000181832	0.0205083	chr6	+	41354105	41357914	860	protein_coding	trypsin_10
ENSMUSG00000025758	Plk4	1.88635	3.14517	polo-like_kinase_4	28.4298	31.1439	12.9226	55.0906	9.7825	5.98276	14.6592	3.14517	0.915596	0.00148302	0.10382	chr3	+	40800019	40816883	6855	protein_coding	polo-like_kinase_4
ENSMUSG00000000184	Ccnd2	1.88689	2.15149	cyclin_D2	513.924	827.971	771.83	667.569	192.715	350.59	426.244	2.15149	0.916008	2.91e-05	0.00467003	chr6	-	127125162	127152193	9409	protein_coding	cyclin_D2
ENSMUSG00000019942	Cdk1	1.88821	5.02829	cyclin-dependent_kinase_1	16.7663	25.8266	4.69912	16.2031	4.89125	1.19655	3.38289	5.02829	0.91702	0.00152042	0.105228	chr10	-	69336635	69352938	3445	protein_coding	cyclin-dependent_kinase_1
ENSMUSG00000002083	Bbc3	1.89612	2.52797	BCL2_binding_component_3	37.9064	34.9419	39.9425	29.1656	17.6085	14.3586	10.1487	2.52797	0.923049	0.000524598	0.0469862	chr7	+	16309616	16318205	2008	protein_coding	BCL2_binding_component_3
ENSMUSG00000022945	Chaf1b	1.90883	28.3394	chromatin_assembly_factor_1_subunit_B_(p60)	5.83176	16.7113	4.69912	9.72188	0.97825	0	0	28.3394	0.932686	0.000591462	0.0510964	chr16	+	93883901	93906115	5001	protein_coding	chromatin_assembly_factor_1_subunit_B_(p60)
ENSMUSG00000006782	Cnp	1.92134	2.07993	2'3'-cyclic_nucleotide_3'_phosphodiesterase	250.037	273.458	296.044	238.726	108.586	119.655	153.358	2.07993	0.942113	1.96e-07	5.95e-05	chr11	+	100574904	100591729	3639	protein_coding	2'3'-cyclic_nucleotide_3'_phosphodiesterase
ENSMUSG00000034427	Myo15b	1.92483	2.64043	myosin_XVB	481.849	205.094	110.429	162.031	115.434	64.6138	92.4656	2.64043	0.944733	0.000506977	0.0460857	chr11	+	115858406	115892603	9857	protein_coding	myosin_XVB
ENSMUSG00000029260	Ugt2b34	1.93181	2.28716	UDP_glucuronosyltransferase_2_family_polypeptide_B34	104.972	154.2	138.624	208.48	44.9995	86.1517	67.6577	2.28716	0.949953	4.99e-05	0.00703945	chr5	-	86889767	86906937	4312	protein_coding	UDP_glucuronosyltransferase_2_family_polypeptide_B34
ENSMUSG00000029126	Nsg1	1.94136	2.55139	neuron_specific_gene_family_member_1	42.2803	34.9419	44.6416	61.5719	21.5215	14.3586	18.0421	2.55139	0.957071	0.000230312	0.0248075	chr5	-	38137192	38159907	3215	protein_coding	neuron_specific_gene_family_member_1
ENSMUSG00000034928	Rnf44	1.9445	2.10513	ring_finger_protein_44	422.074	372.207	386.502	441.805	241.628	163.928	172.527	2.10513	0.9594	5.94e-08	2.15e-05	chr13	-	54679399	54693907	5202	protein_coding	ring_finger_protein_44
ENSMUSG00000028312	Smc2	1.94556	3.01422	structural_maintenance_of_chromosomes_2	27.7009	57.7301	23.4956	59.4115	19.565	15.5552	6.76577	3.01422	0.960189	0.000684238	0.0562128	chr4	+	52439243	52488260	5478	protein_coding	structural_maintenance_of_chromosomes_2
ENSMUSG00000037887	Dusp8	1.95646	2.3056	dual_specificity_phosphatase_8	111.532	69.8838	90.458	88.5771	29.3475	38.2896	49.6157	2.3056	0.968249	2.96e-05	0.00467716	chr7	-	142079490	142095843	4870	protein_coding	dual_specificity_phosphatase_8
ENSMUSG00000030909	Anks4b	1.96137	9.02215	ankyrin_repeat_and_sterile_alpha_motif_domain_containing_4B	8.01867	9.87488	11.7478	11.8823	0	1.19655	2.25526	9.02215	0.971859	0.000612581	0.0518184	chr7	+	120173858	120185586	3900	protein_coding	ankyrin_repeat_and_sterile_alpha_motif_domain_containing_4B
ENSMUSG00000062751	Prss1	1.96541	2.43393	protease_serine_1_(trypsin_1)	196.093	639.588	367.706	279.774	148.694	165.124	143.209	2.43393	0.974833	8.39e-05	0.0109893	chr6	+	41458932	41463786	805	protein_coding	protease_serine_1_(trypsin_1)
ENSMUSG00000041220	Elovl6	1.96965	3.47335	ELOVL_family_member_6_elongation_of_long_chain_fatty_acids_(yeast)	16.0373	18.9902	31.719	42.1281	10.7608	5.98276	6.76577	3.47335	0.97794	0.000675706	0.0559916	chr3	+	129532355	129638495	6431	protein_coding	ELOVL_family_member_6_elongation_of_long_chain_fatty_acids_(yeast)
ENSMUSG00000035769	Xylb	1.97603	3.90037	xylulokinase_homolog_(H._influenzae)	21.1401	13.6729	15.2721	20.524	1.9565	5.98276	5.63814	3.90037	0.982607	0.000730154	0.0585132	chr9	+	119357381	119393797	3860	protein_coding	xylulokinase_homolog_(H._influenzae)
ENSMUSG00000004366	Sst	2.00255	2.61282	somatostatin	110.803	70.6434	112.779	69.1333	39.13	15.5552	49.6157	2.61282	1.00184	0.000101443	0.0127389	chr16	-	23889581	23890844	599	protein_coding	somatostatin
ENSMUSG00000006800	Sulf2	2.01181	2.75619	sulfatase_2	104.972	78.2394	37.5929	50.7698	33.2605	20.3414	20.2973	2.75619	1.0085	0.00016943	0.0196555	chr2	-	166073089	166155663	5818	protein_coding	sulfatase_2
ENSMUSG00000096525	Gm2663	2.01416	3.60117	predicted_gene_2663	21.1401	38.7399	68.1372	58.3313	6.84775	26.3241	5.63814	3.60117	1.01018	0.000466231	0.043238	chr6	-	40995830	40999479	862	protein_coding	predicted_gene_2663
ENSMUSG00000022332	Khdrbs3	2.01779	6.20666	KH_domain_containing_RNA_binding_signal_transduction_associated_3	9.47661	13.6729	16.4469	16.2031	1.9565	4.78621	0	6.20666	1.01278	0.000468029	0.043238	chr15	+	68928420	69093512	1887	protein_coding	KH_domain_containing_RNA_binding_signal_transduction_associated_3
ENSMUSG00000028637	Ccdc30	2.01806	2.76801	coiled-coil_domain_containing_30	32.0747	45.5764	68.1372	49.6896	16.6303	23.931	12.4039	2.76801	1.01297	0.000139935	0.0166575	chr4	-	119322893	119415521	6607	protein_coding	coiled-coil_domain_containing_30
ENSMUSG00000050410	Tcf19	2.02074	4.03276	transcription_factor_19	18.9532	25.067	16.4469	18.3635	7.826	1.19655	5.63814	4.03276	1.01488	0.0004721	0.043238	chr17	-	35512734	35516824	1782	protein_coding	transcription_factor_19
ENSMUSG00000032555	Topbp1	2.02766	2.5075	topoisomerase_(DNA)_II_binding_protein_1	91.8502	56.2109	52.8651	72.374	29.3475	28.7172	23.6802	2.5075	1.01982	3.07e-05	0.00478921	chr9	+	103305215	103350428	11122	protein_coding	topoisomerase_(DNA)_II_binding_protein_1
ENSMUSG00000002870	Mcm2	2.05903	2.58013	minichromosome_maintenance_deficient_2_mitotin_(S._cerevisiae)	126.112	111.662	50.5155	98.299	31.304	37.0931	43.9775	2.58013	1.04196	2.8e-05	0.00454334	chr6	-	88883474	88898780	6956	protein_coding	minichromosome_maintenance_deficient_2_mitotin_(S._cerevisiae)
ENSMUSG00000069793	Slfn9	2.06482	3.21699	schlafen_9	30.6167	39.4995	17.6217	34.5667	9.7825	11.9655	6.76577	3.21699	1.04602	0.000194606	0.0217476	chr11	-	82979629	82991830	4726	protein_coding	schlafen_9
ENSMUSG00000078185	Chml	2.07142	3.52832	choroideremia-like	19.6822	28.865	32.8938	60.4917	5.8695	10.769	13.5315	3.52832	1.05062	0.00023217	0.0248075	chr1	-	175682237	175688353	6117	protein_coding	choroideremia-like
ENSMUSG00000022673	Mcm4	2.0784	3.59425	minichromosome_maintenance_deficient_4_homolog_(S._cerevisiae)	45.1961	50.134	15.2721	33.4865	8.80425	16.7517	4.51052	3.59425	1.05547	0.000235239	0.0248917	chr16	-	15623897	15637400	3589	protein_coding	minichromosome_maintenance_deficient_4_homolog_(S._cerevisiae)
ENSMUSG00000050711	Scg2	2.08422	2.79832	secretogranin_II	211.401	102.547	263.151	207.4	82.173	31.1103	96.9761	2.79832	1.05951	4.82e-05	0.00690078	chr1	-	79434669	79440120	2515	protein_coding	secretogranin_II
ENSMUSG00000013419	Zfp651	2.11308	2.96556	zinc_finger_protein_651	49.57	58.4897	35.2434	31.326	17.6085	10.769	15.7868	2.96556	1.07935	5.52e-05	0.00763607	chr9	+	121760033	121771742	6353	protein_coding	zinc_finger_protein_651
ENSMUSG00000052727	Map1b	2.14847	3.27334	microtubule-associated_protein_1B	23.327	57.7301	57.5642	44.2885	17.6085	10.769	13.5315	3.27334	1.10331	5.91e-05	0.00808964	chr13	-	99421464	99516602	11852	protein_coding	microtubule-associated_protein_1B
ENSMUSG00000041219	Arhgap11a	2.1525	7.94125	Rho_GTPase_activating_protein_11A	16.7663	30.3843	8.22346	19.4438	5.8695	1.19655	0	7.94125	1.10601	0.000131371	0.0158438	chr2	-	113831492	113848661	5332	protein_coding	Rho_GTPase_activating_protein_11A
ENSMUSG00000031790	Mmp15	2.16458	2.47151	matrix_metallopeptidase_15	344.074	214.209	199.713	264.651	106.629	90.9379	112.763	2.47151	1.11409	6.1e-08	2.15e-05	chr8	+	95352268	95374293	4348	protein_coding	matrix_metallopeptidase_15
ENSMUSG00000017311	Pyy	2.18683	5.05432	peptide_YY	28.4298	19.7498	14.0974	16.2031	5.8695	2.3931	3.38289	5.05432	1.12884	0.00010434	0.012969	chr11	-	102106676	102107832	631	protein_coding	peptide_YY
ENSMUSG00000040532	Abhd11	2.20005	3.01741	abhydrolase_domain_containing_11	99.8689	43.2976	101.031	101.54	35.217	19.1448	31.5736	3.01741	1.13753	1.14e-05	0.00210514	chr5	+	135009152	135012175	2172	protein_coding	abhydrolase_domain_containing_11
ENSMUSG00000038009	Dnajc22	2.20184	2.84784	DnaJ_heat_shock_protein_family_(Hsp40)_member_C22	45.9251	57.7301	55.2146	55.0906	16.6303	23.931	15.7868	2.84784	1.13871	4.73e-06	0.00108659	chr15	+	99093170	99104737	1850	protein_coding	DnaJ_heat_shock_protein_family_(Hsp40)_member_C22
ENSMUSG00000022360	Atad2	2.21135	3.47234	ATPase_family_AAA_domain_containing_2	58.3176	62.2877	21.146	39.9677	14.6738	15.5552	9.02103	3.47234	1.14493	3.85e-05	0.0057149	chr15	-	58094047	58135082	5683	protein_coding	ATPase_family_AAA_domain_containing_2
ENSMUSG00000039357	Fut11	2.22582	3.60174	fucosyltransferase_11	28.4298	33.4227	29.3695	28.0854	10.7608	9.57241	4.51052	3.60174	1.15434	3.36e-05	0.00505262	chr14	+	20694968	20700197	3344	protein_coding	fucosyltransferase_11
ENSMUSG00000023169	Slc38a1	2.25031	3.00542	solute_carrier_family_38_member_1	60.5045	125.335	72.8363	58.3313	24.4563	28.7172	25.9355	3.00542	1.17012	4.52e-06	0.00105961	chr15	-	96571418	96642913	8391	protein_coding	solute_carrier_family_38_member_1
ENSMUSG00000022351	Sqle	2.251	2.69102	squalene_epoxidase	94.7661	98.7488	139.799	137.186	37.1735	45.469	48.488	2.69102	1.17057	1.16e-07	3.71e-05	chr15	+	59315077	59331192	5546	protein_coding	squalene_epoxidase
ENSMUSG00000001504	Irx2	2.25217	#DIV/0!	Iroquois_related_homeobox_2_(Drosophila)	8.74764	6.07685	15.2721	15.1229	0	0	0	#DIV/0!	1.17132	2.59e-05	0.00431526	chr13	+	72628820	72634198	3282	protein_coding	Iroquois_related_homeobox_2_(Drosophila)
ENSMUSG00000079598	Clec2l	2.25852	#DIV/0!	C-type_lectin_domain_family_2_member_L	8.74764	12.1537	11.7478	8.64167	0	0	0	#DIV/0!	1.17538	2.53e-05	0.00427667	chr6	+	38663069	38680864	1428	protein_coding	C-type_lectin_domain_family_2_member_L
ENSMUSG00000062012	Zfp13	2.26559	2.94131	zinc_finger_protein_13	68.5232	72.9222	74.0111	60.4917	24.4563	33.5034	12.4039	2.94131	1.17988	1.89e-06	0.000478622	chr17	-	23575845	23599487	2439	protein_coding	zinc_finger_protein_13
ENSMUSG00000024990	Rbp4	2.30347	5.23047	retinol_binding_protein_4_plasma	16.0373	22.0286	24.6704	21.6042	2.93475	2.3931	6.76577	5.23047	1.20381	3.29e-05	0.00502653	chr19	-	38116620	38125321	1297	protein_coding	retinol_binding_protein_4_plasma
ENSMUSG00000036459	Wtip	2.39739	4.66873	WT1-interacting_protein	26.9719	34.1823	22.3208	22.6844	7.826	3.58965	5.63814	4.66873	1.26147	9.65e-06	0.00183757	chr7	-	34109543	34133268	2383	protein_coding	WT1-interacting_protein
ENSMUSG00000024386	Proc	2.42837	39.1873	protein_C	13.1215	16.7113	9.39824	11.8823	0.97825	0	0	39.1873	1.27999	7.37e-06	0.00149617	chr18	-	32123129	32139570	1566	protein_coding	protein_C
ENSMUSG00000024907	Gal	2.46267	2.73471	galanin	1398.89	1042.94	1641.17	1261.68	524.342	526.483	414.967	2.73471	1.30022	2.01e-13	1.53e-10	chr19	-	3409919	3414472	712	protein_coding	galanin
ENSMUSG00000034785	Dio1	2.47664	7.47778	deiodinase_iodothyronine_type_I	17.4953	25.8266	29.3695	27.0052	0.97825	0	9.02103	7.47778	1.30839	7.06e-06	0.00145799	chr4	-	107291465	107307169	1970	protein_coding	deiodinase_iodothyronine_type_I
ENSMUSG00000033685	Ucp2	2.47895	2.99876	uncoupling_protein_2_(mitochondrial_proton_carrier)	325.85	311.439	163.294	250.608	74.347	82.562	105.997	2.99876	1.30973	2.89e-09	1.26e-06	chr7	+	100493337	100502020	6989	protein_coding	uncoupling_protein_2_(mitochondrial_proton_carrier)
ENSMUSG00000071517	Gm10334	2.48443	3.25022	predicted_gene_10334	247.85	749.731	428.795	359.709	153.585	123.245	135.315	3.25022	1.31291	6.18e-08	2.15e-05	chr6	-	41442216	41446145	876	protein_coding	predicted_gene_10334
ENSMUSG00000053279	Aldh1a1	2.5113	3.0744	aldehyde_dehydrogenase_family_1_subfamily_A1	380.522	570.464	713.091	843.643	150.651	233.328	227.781	3.0744	1.32844	2.33e-09	1.05e-06	chr19	+	20601961	20643462	2053	protein_coding	aldehyde_dehydrogenase_family_1_subfamily_A1
ENSMUSG00000028699	Tspan1	2.5303	4.37836	tetraspanin_1	32.0747	34.1823	41.1173	35.6469	10.7608	3.58965	10.1487	4.37836	1.33931	1.19e-06	0.00031485	chr4	-	116161869	116167601	2329	protein_coding	tetraspanin_1
ENSMUSG00000033581	Igf2bp2	2.57138	6.47046	insulin-like_growth_factor_2_mRNA_binding_protein_2	21.1401	29.6246	23.4956	18.3635	4.89125	3.58965	2.25526	6.47046	1.36254	2.47e-06	0.000589121	chr16	-	22059009	22163299	7131	protein_coding	insulin-like_growth_factor_2_mRNA_binding_protein_2
ENSMUSG00000046449	C77370	2.60546	5.72444	expressed_sequence_C77370	24.785	28.1054	32.8938	41.0479	9.7825	1.19655	5.63814	5.72444	1.38154	1.32e-06	0.000341764	chrX	-	104077434	104201185	11532	protein_coding	expressed_sequence_C77370
ENSMUSG00000046480	Scn4b	2.82165	3.4087	sodium_channel_type_IV_beta	199.738	207.373	148.022	159.871	39.13	55.0414	63.1472	3.4087	1.49654	1.4e-12	8.95e-10	chr9	+	45138437	45154152	4940	protein_coding	sodium_channel_type_IV_beta
ENSMUSG00000041859	Mcm3	2.83978	8.54275	minichromosome_maintenance_deficient_3_(S._cerevisiae)	43.7382	38.7399	18.7965	19.4438	4.89125	1.19655	4.51052	8.54275	1.50578	2.07e-07	6.15e-05	chr1	-	20802968	20820312	3752	protein_coding	minichromosome_maintenance_deficient_3_(S._cerevisiae)
ENSMUSG00000026355	Mcm6	2.8859	5.17369	minichromosome_maintenance_deficient_6_(MIS5_homolog_S._pombe)_(S._cerevisiae)	105.701	101.787	45.8164	86.4167	13.6955	29.9138	5.63814	5.17369	1.52902	2.87e-08	1.09e-05	chr1	-	128331590	128359664	4666	protein_coding	minichromosome_maintenance_deficient_6_(MIS5_homolog_S._pombe)_(S._cerevisiae)
ENSMUSG00000094808	1810009J06Rik	2.94978	4.48552	RIKEN_cDNA_1810009J06_gene	90.3923	112.422	189.14	187.956	18.5868	49.0586	29.3183	4.48552	1.56061	1.48e-09	7.2e-07	chr6	+	40964754	40968435	882	protein_coding	RIKEN_cDNA_1810009J06_gene
ENSMUSG00000005410	Mcm5	3.0427	7.81903	minichromosome_maintenance_deficient_5_cell_division_cycle_46_(S._cerevisiae)	72.168	51.6532	18.7965	38.8875	6.84775	7.17931	3.38289	7.81903	1.60535	2.19e-08	8.61e-06	chr8	+	75109528	75128439	3422	protein_coding	minichromosome_maintenance_deficient_5_cell_division_cycle_46_(S._cerevisiae)
ENSMUSG00000034926	Dhcr24	3.16519	4.50593	24-dehydrocholesterol_reductase	90.3923	111.662	70.4868	70.2135	17.6085	19.1448	20.2973	4.50593	1.66229	9.36e-12	5.43e-09	chr4	+	106561038	106589113	4028	protein_coding	24-dehydrocholesterol_reductase
ENSMUSG00000078520	Cela3a	3.44964	5.22351	chymotrypsin-like_elastase_family_member_3A	422.803	376.765	358.308	316.501	125.216	52.6483	33.8289	5.22351	1.78645	6.66e-13	4.5e-10	chr4	-	137401554	137409791	958	protein_coding	chymotrypsin-like_elastase_family_member_3A
ENSMUSG00000044313	Mab21l3	3.48367	7.11104	mab-21-like_3_(C._elegans)	35.7195	55.4513	63.4381	45.3688	4.89125	7.17931	9.02103	7.11104	1.80061	4.44e-11	2.46e-08	chr3	-	101813076	101848959	3610	protein_coding	mab-21-like_3_(C._elegans)
ENSMUSG00000078942	Naip6	3.58575	6.52886	NLR_family_apoptosis_inhibitory_protein_6	127.57	102.547	57.5642	59.4115	16.6303	11.9655	11.2763	6.52886	1.84227	4.29e-12	2.61e-09	chr13	-	100281121	100317674	6827	protein_coding	NLR_family_apoptosis_inhibitory_protein_6
ENSMUSG00000033022	Cdo1	3.71873	5.29937	cysteine_dioxygenase_1_cytosolic	146.523	228.641	197.363	207.4	22.4998	57.4345	30.446	5.29937	1.89481	9.58e-16	9.72e-13	chr18	-	46713205	46728342	1530	protein_coding	cysteine_dioxygenase_1_cytosolic
ENSMUSG00000069132	Nxph2	4.03193	8.52047	neurexophilin_2	54.6727	67.605	55.2146	70.2135	2.93475	14.3586	4.51052	8.52047	2.01147	1.11e-13	9.01e-11	chr2	+	23321246	23401973	2579	protein_coding	neurexophilin_2
ENSMUSG00000031099	Smarca1	5.11866	13.1057	SWI/SNF_related_matrix_associated_actin_dependent_regulator_of_chromatin_subfamily_a_member_1	69.9811	69.1242	69.312	126.384	8.80425	3.58965	6.76577	13.1057	2.35576	2.25e-18	3.05e-15	chrX	-	47809368	47892974	6118	protein_coding	SWI/SNF_related_matrix_associated_actin_dependent_regulator_of_chromatin_subfamily_a_member_1
ENSMUSG00000072770	Acrbp	5.22709	9.75547	proacrosin_binding_protein	110.074	110.143	115.128	137.186	18.5868	14.3586	3.38289	9.75547	2.38601	1.28e-21	2.22e-18	chr6	+	125049689	125063267	3277	protein_coding	proacrosin_binding_protein
ENSMUSG00000074489	Bglap3	6.46679	23.3481	bone_gamma-carboxyglutamate_protein_3	274.093	100.268	140.974	104.78	10.7608	2.3931	6.76577	23.3481	2.69305	1.47e-22	2.99e-19	chr3	-	88368616	88372743	2629	protein_coding	bone_gamma-carboxyglutamate_protein_3
ENSMUSG00000085042	Abhd11os	7.26959	14.5012	abhydrolase_domain_containing_11_opposite_strand	157.457	121.537	182.091	174.994	8.80425	7.17931	16.9144	14.5012	2.86187	6.33e-32	1.93e-28	chr5	-	135012114	135013253	701	antisense	abhydrolase_domain_containing_11_opposite_strand
ENSMUSG00000081506	Amy2	9.63176	24.5141	amylase_2_pseudogene_1	236.186	286.372	509.854	305.699	5.8695	21.5379	13.5315	24.5141	3.2678	4.99e-38	2.02e-34	chr3	-	113182249	113206697	1117	unprocessed_pseudogene	amylase_2_pseudogene_1
