# Supplementary material
Source: HighWire-hosted journal article supplement (https://gut.bmj.com/content/gutjnl-2019-318362)
Supplement: inline-supplementary-material-5 [file inline-supplementary-material-5.xlsx]

## Sheet: Sheet2
Gene Description	Gene Name	FC	pvalue	KO_1	KO_2	KO_3	KO_4	WT_1	WT_2	WT_3	padj	Chrom
argininosuccinate synthetase 1	Ass1	1.52287	0.00293121	128.299	96.47	105.73	123.144	62.608	64.6138	81.1893	0.155877	chr2
expressed sequence C77370	C77370	2.60546	1.32e-06	24.785	28.1054	32.8938	41.0479	9.7825	1.19655	5.63814	0.000341764	chrX
calcium/calmodulin-dependent protein kinase II, beta	Camk2b	1.56409	0.0015026	500.802	533.244	553.321	442.885	430.43	220.165	251.461	0.104589	chr11
cyclin A2	Ccna2	1.70171	0.0061251	5.10279	34.1823	4.69912	11.8823	1.9565	2.3931	3.38289	0.255513	chr3
cell division cycle 6	Cdc6	1.65574	0.00692905	18.2242	15.1921	0	10.8021	0.97825	1.19655	2.25526	0.275197	chr11
CDP-diacylglycerol synthase 1	Cds1	1.51656	0.0298628	5.10279	6.83646	16.4469	6.48125	1.9565	0	4.51052	0.613505	chr5
centrosomal protein 192	Cep192	1.56668	0.0140313	31.3457	28.1054	29.3695	35.6469	14.6738	17.9483	16.9144	0.425164	chr18
carbohydrate sulfotransferase 2	Chst2	0.631112	5.03e-05	646.596	593.253	553.321	670.809	989.011	848.355	1221.22	0.00703945	chr9
C-type lectin domain family 2, member L	Clec2l	2.25852	2.53e-05	8.74764	12.1537	11.7478	8.64167	0	0	0	0.00427667	chr6
copine VIII	Cpne8	0.456658	1.22e-05	19.6822	20.5094	14.0974	10.8021	48.9125	53.8448	42.8499	0.00222329	chr15
DEK oncogene (DNA binding)	Dek	1.52211	0.00998055	88.9343	151.921	81.0598	138.267	49.8908	74.1862	80.0616	0.349348	chr13
24-dehydrocholesterol reductase	Dhcr24	3.16519	9.36e-12	90.3923	111.662	70.4868	70.2135	17.6085	19.1448	20.2973	5.43e-09	chr4
eukaryotic translation initiation factor 1B	Eif1b	1.67861	0.00254056	51.0279	53.1724	93.9824	62.6521	33.2605	25.1276	39.467	0.140666	chr9
Fanconi anemia, complementation group M	Fancm	1.51105	0.028079	33.5326	32.6631	22.3208	27.0052	11.739	21.5379	14.6592	0.593803	chr12
fatty acid synthase	Fasn	1.65871	6.13e-05	279.195	278.016	280.772	281.934	197.607	120.852	155.613	0.0083021	chr11
F-box and WD-40 domain protein 7	Fbxw7	0.632312	0.00272672	52.4858	49.3744	34.0686	55.0906	85.1078	72.9896	92.4656	0.147618	chr3
fibronectin leucine rich transmembrane protein 2	Flrt2	0.655004	0.0203601	24.785	22.0286	27.0199	25.925	68.4775	34.7	30.446	0.505104	chr12
galanin	Gal	2.46267	2.01e-13	1398.89	1042.94	1641.17	1261.68	524.342	526.483	414.967	1.53e-10	chr19
gamma-glutamyltransferase 1	Ggt1	0.645965	7.11e-05	714.39	593.253	868.162	697.815	1189.55	1110.4	1162.59	0.00941002	chr10
GINS complex subunit 4 (Sld5 homolog)	Gins4	1.62792	0.00652775	48.112	36.4611	30.5443	42.1281	15.652	22.7345	22.5526	0.267555	chr8
grainyhead-like 1 (Drosophila)	Grhl1	1.84735	0.00237055	15.3084	15.1921	10.573	14.0427	3.913	2.3931	4.51052	0.137184	chr12
helicase, lymphoid specific	Hells	1.74597	0.00474324	14.5794	16.7113	3.52434	24.8448	0.97825	7.17931	1.12763	0.208583	chr19
helicase, POLQ-like	Helq	1.55337	0.0236354	31.3457	16.7113	21.146	29.1656	8.80425	15.5552	12.4039	0.547122	chr5
5-hydroxymethylcytosine (hmC) binding, ES cell specific	Hmces	1.64087	0.0139338	21.1401	15.1921	23.4956	11.8823	8.80425	9.57241	2.25526	0.424591	chr6
isoamyl acetate-hydrolyzing esterase 1 homolog	Iah1	1.70073	9.95e-05	112.99	117.739	145.673	131.785	74.347	63.4172	67.6577	0.0126276	chr12
insulin-like growth factor I receptor	Igf1r	0.580694	0.000514966	46.6541	63.0473	42.2921	41.0479	108.586	71.7931	102.614	0.0464652	chr7
KIT proto-oncogene receptor tyrosine kinase	Kit	0.519481	0.00060656	14.5794	28.865	29.3695	25.925	108.586	56.2379	31.5736	0.0516678	chr5
kelch-like 25	Klhl25	1.55368	0.0267268	18.9532	18.9902	16.4469	18.3635	4.89125	8.37586	12.4039	0.576401	chr7
lactate dehydrogenase A	Ldha	1.53612	0.00236344	217.233	336.506	382.978	289.496	223.041	150.765	181.548	0.137184	chr7
leukemia inhibitory factor receptor	Lifr	0.602361	1.82e-05	351.363	310.679	340.686	461.249	674.015	668.872	576.218	0.00315996	chr15
LIM domain only 7	Lmo7	1.54478	0.00974365	56.1307	56.2109	38.7677	63.7323	36.1953	25.1276	30.446	0.342669	chr14
leucine rich repeat containing 39	Lrrc39	1.54461	0.028948	13.8504	14.4325	24.6704	25.925	10.7608	9.57241	6.76577	0.605868	chr3
microtubule-associated protein tau	Mapt	0.528355	0.000381976	15.3084	14.4325	16.4469	24.8448	45.9778	40.6827	39.467	0.0369273	chr11
MARVEL (membrane-associating) domain containing 2	Marveld2	1.58162	0.015333	46.6541	42.538	38.7677	18.3635	19.565	22.7345	13.5315	0.439128	chr13
myosin VIIA and Rab interacting protein	Myrip	0.66372	0.0144333	35.7195	44.0572	61.0885	55.0906	53.8038	86.1517	107.125	0.428809	chr9
nuclear autoantigenic sperm protein (histone-binding)	Nasp	1.55749	0.0158724	29.1588	48.6148	25.8452	46.449	20.5433	20.3414	19.1697	0.447551	chr4
neuron navigator 2	Nav2	0.652713	0.0164481	20.4112	26.5862	19.9713	27.0052	44.9995	51.4517	29.3183	0.457788	chr7
neuron specific gene family member 1	Nsg1	1.94136	0.000230312	42.2803	34.9419	44.6416	61.5719	21.5215	14.3586	18.0421	0.0248075	chr5
piccolo (presynaptic cytomatrix protein)	Pclo	0.638177	0.0109831	17.4953	33.4227	19.9713	28.0854	48.9125	41.8793	45.1052	0.372661	chr5
proprotein convertase subtilisin/kexin type 6	Pcsk6	0.4413	2.17e-06	36.4485	32.6631	19.9713	15.1229	70.434	87.3482	76.6788	0.000538299	chr7
phosphodiesterase 9A	Pde9a	0.535522	0.00178675	0.72897	3.03843	4.69912	5.40104	20.5433	8.37586	14.6592	0.116387	chr17
phosphogluconate dehydrogenase	Pgd	1.59143	0.00243844	114.448	80.5183	119.828	74.5344	56.7385	56.2379	52.9986	0.138152	chr4
pleckstrin homology like domain, family A, member 3	Phlda3	1.82914	0.00246529	36.4485	23.5478	17.6217	22.6844	10.7608	2.3931	12.4039	0.138443	chr1
phosphoinositide-3-kinase adaptor protein 1	Pik3ap1	0.635647	0.00389463	63.4204	76.7202	109.255	66.9729	179.02	100.51	130.805	0.18748	chr19
phospholipase C-like 1	Plcl1	0.54951	0.00237946	8.74764	6.83646	9.39824	8.64167	21.5215	27.5207	18.0421	0.137184	chr1
pancreatic lipase	Pnlip	0.563311	8.82e-06	320552	297314	513235	384175	628416	810380	735003	0.00176106	chr19
protein O-fucosyltransferase 1	Pofut1	0.620919	0.00444035	36.4485	31.9035	31.719	29.1656	78.26	56.2379	43.9775	0.204105	chr2
protein tyrosine phosphatase, receptor type, J	Ptprj	1.53618	0.00173382	328.036	420.822	363.007	230.084	180.976	224.952	208.611	0.114161	chr2
replication factor C (activator 1) 5	Rfc5	1.83992	0.00167758	27.7009	37.9803	16.4469	37.8073	8.80425	11.9655	13.5315	0.111664	chr5
ring finger protein 44	Rnf44	1.9445	5.94e-08	422.074	372.207	386.502	441.805	241.628	163.928	172.527	2.15e-05	chr13
ribonucleotide reductase M1	Rrm1	1.57679	0.0174977	29.8878	58.4897	22.3208	54.0104	15.652	16.7517	29.3183	0.472349	chr7
SET domain containing 2	Setd2	0.558456	0.000175891	45.9251	33.4227	31.719	47.5292	80.2165	75.3827	86.8274	0.0200418	chr9
SH3-domain binding protein 4	Sh3bp4	0.665957	0.0356656	17.4953	13.6729	8.22346	12.9625	18.5868	26.3241	30.446	0.666323	chr1
shisa family member 4	Shisa4	1.51971	0.00923593	56.1307	53.932	56.3894	58.3313	28.3693	31.1103	40.5946	0.332849	chr1
solute carrier family 20, member 1	Slc20a1	1.53461	0.0248144	31.3457	20.5094	24.6704	38.8875	12.7173	11.9655	20.2973	0.563945	chr2
solute carrier family 7 (cationic amino acid transporter, y+ system), member 2	Slc7a2	0.649113	0.00844413	144.336	90.3931	69.312	130.705	199.563	241.703	122.912	0.311691	chr8
small integral membrane protein 3	Smim3	0.498784	0.000533631	4.37382	6.83646	12.9226	8.64167	46.956	16.7517	20.2973	0.0474464	chr18
stannin	Snn	1.73068	0.00460465	29.8878	24.3074	32.8938	30.2458	17.6085	14.3586	4.51052	0.205129	chr16
sortilin-related receptor, LDLR class A repeats-containing	Sorl1	0.359284	4.09e-09	21.8691	18.9902	18.7965	11.8823	89.0208	56.2379	65.4025	1.72e-06	chr9
SRY (sex determining region Y)-box 6	Sox6	0.587216	0.00305312	16.7663	25.067	25.8452	32.4063	39.13	71.7931	43.9775	0.159614	chr7
supervillin	Svil	0.64859	0.00434524	59.7755	70.6434	64.6129	56.1708	109.564	134.014	74.4235	0.201252	chr18
TAM41 mitochondrial translocator assembly and maintenance homolog	Tamm41	1.54194	0.0273056	29.1588	25.8266	18.7965	14.0427	10.7608	11.9655	10.1487	0.582503	chr6
TBK1 binding protein 1	Tbkbp1	0.615315	0.0150745	20.4112	8.35567	8.22346	14.0427	50.869	19.1448	19.1697	0.438823	chr11
toll-like receptor 2	Tlr2	1.52796	0.0355794	17.4953	17.4709	43.4668	8.64167	11.739	7.17931	9.02103	0.666323	chr3
tripartite motif-containing 24	Trim24	0.646144	0.000984074	68.5232	78.2394	75.1859	77.775	119.347	135.21	115.018	0.0744535	chr6
tetratricopeptide repeat domain 4	Ttc4	1.67169	0.001781	95.4951	58.4897	79.885	61.5719	43.043	43.0758	29.3183	0.116387	chr4
thioredoxin reductase 3	Txnrd3	0.640317	0.0234338	10.9345	14.4325	7.04868	8.64167	19.565	26.3241	19.1697	0.544747	chr6
WEE 1 homolog 1 (S. pombe)	Wee1	1.50788	0.0300387	74.3549	58.4897	29.3695	88.5771	18.5868	52.6483	31.5736	0.613505	chr7
WT1-interacting protein	Wtip	2.39739	9.65e-06	26.9719	34.1823	22.3208	22.6844	7.826	3.58965	5.63814	0.00183757	chr7
xenotropic and polytropic retrovirus receptor 1	Xpr1	0.653712	0.0158312	21.8691	26.5862	18.7965	29.1656	34.2388	53.8448	40.5946	0.447424	chr1
tyrosine 3-monooxygenase/tryptophan 5-monooxygenase activation protein, eta polypeptide	Ywhah	1.55661	0.00093484	163.289	136.729	142.148	144.748	106.629	82.562	75.5511	0.0723794	chr5
zinc finger protein 420	Zfp420	0.552355	0.0032477	5.83176	6.07685	4.69912	6.48125	25.4345	17.9483	10.1487	0.163472	chr7
zinc finger protein 706	Zfp706	1.51471	0.00137228	775.624	698.078	1134.84	1052.12	534.125	524.089	655.152	0.0983282	chr15
zinc finger protein 949	Zfp949	0.607486	0.0126554	7.2897	8.35567	5.8739	14.0427	30.3258	16.7517	15.7868	0.407818	chr9
