# Supplementary material
Source: HighWire-hosted journal article supplement (https://gut.bmj.com/content/gutjnl-2019-318362)
Supplement: inline-supplementary-material-7 [file inline-supplementary-material-7.xlsx]

## Sheet: Sheet1
AccID	FC	log2FC	Pvalue	FDR	KO1-2	KO1-1	WT-1	WT-2	KeggID	Description	OverlapInfor	chr	start	end	width	strand	id	score	annotation	geneChr	geneStart	geneEnd	geneLength	geneStrand	AccId2	transcriptId	distanceToTSS	flank_txIds	flank_AccIds	flank_gene_distances	pileup	(-log10(pvalue)	fold_enrichment	(-log10(qvalue)
1700010I14Rik	0	-6.6197	0.000316607	0.00190622	0	0	18	20	mmu:66931	RIKEN cDNA 1700010I14, isoform CRA_b	WT_Only	chr17	9030881	9031197	317	*	317	11.45	Distal Intergenic	17	8988333	9008319	19987	1	1700010I14Rik	NM_025851.3	42548	NA	NA	NA	11.45	8.13138	5.2699	3.87535
Dnase1	0	-5.182	0.028818	0.0908155	0	0	7	7	mmu:13419	Deoxyribonuclease-1	WT_Only	chr16	4053599	4054825	1227	*	1227	9.06	Exon (NM_026508.2/Trap1, exon 9 of 18)	16	4037145	4040024	2880	1	Dnase1	NM_010061.5	16454	NM_026508.2;XR_001781855.1;XR_001781856.1	Trap1;Trap1;Trap1	0;0;0	9.06	5.82604	4.2587	2.06345
Pdia2	0	-4.95045	0.0476467	0.134502	0	0	5	7	mmu:69191	Protein disulfide-isomerase A2	WT_Only	chr17	26174431	26174793	363	*	363	8.56	Intron (XM_006523515.3/Axin1, intron 4 of 11)	17	26195999	26199087	3089	2	Pdia2	NM_001081070.1	24294	XM_006523515.3;NM_001159598.1;NM_009733.2;XM_006523516.2	Axin1;Axin1;Axin1;Axin1	0;0;0;0	8.56	5.15054	3.90618	1.65587
Paqr6	0.00328947	-8.18205	5.01456e-08	6.36667e-07	0	1	159	145	mmu:68957	Progestin and adipoQ receptor family member 6	WT_Only	chr3	88360967	88362097	1131	*	1131	8.93	Promoter (1-2kb)	3	88364071	88368541	4471	1	Paqr6	XM_006502009.3	-1974	XM_006502009.3;XM_006502007.2;XM_006502010.3;NM_001310597.1;NM_198410.3;XM_017319706.1;XM_017319705.1;NM_178246.3;XM_006501343.3;XM_011240087.2;XM_006501345.2	Paqr6;Paqr6;Paqr6;Paqr6;Paqr6;Paqr6;Paqr6;Smg5;Smg5;Smg5;Smg5	-1974;-2424;-2470;-2492;-2492;-3013;-3427;0;0;0;0	8.93	5.40787	4.01348	1.87162
Lpl	0.0118304	-6.32133	7.00023e-16	2.1163e-14	8	28	1491	1552	mmu:16956	Lipoprotein lipase	WT_Only	chr8	68904821	68906609	1789	*	1789	13.81	3' UTR	8	68880555	68906932	26378	1	Lpl	NM_008509.2	24266	NM_008509.2	Lpl	0	13.81	10.886	6.26749	6.51025
Slc26a2	0.0289023	-5.03503	2.73423e-109	2.33746e-106	250	309	8449	10892	mmu:13521	Sulfate transporter	WT_Only	chr18	61198735	61199820	1086	*	1086	9.93	Exon (NM_007885.2/Slc26a2, exon 4 of 4)	18	61196854	61211596	14743	2	Slc26a2	NM_007885.2	11776	NM_007885.2	Slc26a2	0	9.93	5.4042	3.86192	1.91273
Nes	0.0361956	-4.71542	2.91546e-135	6.40902e-132	344	365	9124	10464	mmu:18008	Nestin	WT_Only	chr3	87976125	87976505	381	*	381	12.24	Exon (NM_016701.3/Nes, exon 4 of 4)	3	87971093	87980451	9359	1	Nes	NM_016701.3	5032	NM_016701.3	Nes	0	12.24	5.94103	3.85807	2.23508
Cyp2ab1	0.0526316	-4.16098	0.0429538	0.124243	0	1	7	12	mmu:224044	Cyp2ab1 protein	WT_Only	chr16	20333636	20333997	362	*	362	8.91	Exon (XR_001781830.1/Abcc5, exon 28 of 29)	16	20308387	20325404	17018	2	Cyp2ab1	NM_183158.3	-8232	XR_001781830.1;XR_001781832.1;XR_001781833.1;XR_001781834.1;XR_001781831.1;XR_001781835.1;XR_001781836.1;XR_384568.1;XR_384569.1;NM_013790.2;XM_017317027.1;XM_006522208.3;XM_006522212.3;XM_006522213.3;XM_017317029.1;XM_006522209.3	Abcc5;Abcc5;Abcc5;Abcc5;Abcc5;Abcc5;Abcc5;Abcc5;Abcc5;Abcc5;Abcc5;Abcc5;Abcc5;Abcc5;Abcc5;Abcc5	0;0;0;0;0;0;0;0;0;0;0;0;0;0;0;0	8.91	5.61954	4.14631	1.95622
Erbb2	0.0619076	-3.94308	1.03898e-84	5.15737e-82	219	199	3170	3582	mmu:13866	Receptor tyrosine-protein kinase erbB-2	WT_Only	chr11	98420541	98422866	2326	*	2326	10.05	Exon (NM_001003817.1/Erbb2, exon 3 of 27)	11	98412484	98437716	25233	1	Erbb2	NM_001003817.1	8057	NM_001003817.1	Erbb2	0	10.05	5.93036	4.16673	2.21001
Anxa13	0.0733297	-3.69628	2.02294e-78	7.98181e-76	328	347	4241	4964	mmu:69787	Annexin A13	WT_Only	chr15	58359285	58359718	434	*	434	8.95	Intron (NM_027211.2/Anxa13, intron 2 of 7)	15	58341464	58389274	47811	2	Anxa13	NM_027211.2	29556	NM_027211.2	Anxa13	0	8.95	5.1606	3.86025	1.72255
Slc37a1	0.110693	-3.10511	8.74507e-29	5.90216e-27	83	64	613	715	mmu:224674	Putative uncharacterized protein	WT_Only	chr17	31338332	31338726	395	*	395	10.49	Intron (XM_011246396.2/Slc37a1, intron 14 of 19)	17	31323385	31350709	27325	1	Slc37a1	XM_017317410.1	14947	XM_011246396.2;NM_153062.2;XM_006524097.3;NM_001242427.1;XM_006524099.3;XM_017317410.1	Slc37a1;Slc37a1;Slc37a1;Slc37a1;Slc37a1;Slc37a1	0;0;0;0;0;0	10.49	6.16147	4.24271	2.36389
Lrrc71	0.129032	-2.88365	0.0273	0.0869756	3	1	13	18	mmu:74485	Leucine-rich repeat-containing protein 71	WT_Only	chr3	87728307	87729397	1091	*	1091	8.5	Exon (XM_006501264.2/Arhgef11, exon 32 of 43)	3	87738971	87743069	4099	2	Lrrc71	XM_011240257.2	13672	XM_006501264.2;XM_006501265.2;XM_006501266.2;XM_006501267.2;XM_006501268.2;XM_006501269.2;XM_006501270.2;XM_006501271.2;XM_006501272.2;XM_006501273.2;XM_006501274.2;XM_006501275.2;XM_011240067.1;XM_017319518.1;NM_001003912.1	Arhgef11;Arhgef11;Arhgef11;Arhgef11;Arhgef11;Arhgef11;Arhgef11;Arhgef11;Arhgef11;Arhgef11;Arhgef11;Arhgef11;Arhgef11;Arhgef11;Arhgef11	0;0;0;0;0;0;0;0;0;0;0;0;0;0;0	8.5	4.88705	3.74624	1.5824
LOC105246496	0.142857	-2.73469	0.0134486	0.0489932	1	6	27	22			WT_Only	chr18	73640158	73640816	659	*	659	9.24	3' UTR	18	73701075	73705353	4279	1	LOC105246496	XM_011247065.1	-60259	XM_006525701.3;XM_006525702.3;XM_011246855.2;NM_008540.2	Smad4;Smad4;Smad4;Smad4	0;0;0;0	9.24	4.78457	3.58706	1.49302
Cyp51	0.16151	-2.55874	1.25933e-45	1.86332e-43	6075	6656	37766	41059	mmu:13121	Lanosterol 14-alpha demethylase	WT_Only	chr5	4094032	4096208	2177	*	2177	14.16	Intron (NM_020010.2/Cyp51, intron 5 of 9)	5	4080674	4104697	24024	2	Cyp51	NM_020010.2	8489	NM_020010.2	Cyp51	0	14.16	5.10216	3.17732	1.68043
Meis2	0.174886	-2.4461	5.13319e-30	3.72592e-28	240	221	1268	1368	mmu:17536	Homeobox protein Meis2	WT_Only	chr2	115996537	115998032	1496	*	1496	9.2	Intron (NM_001159569.1/Meis2, intron 8 of 12)	2	115861264	116064621	203358	2	Meis2	NM_001159569.1	66589	NM_001159569.1;NM_001159570.1;NM_001136072.2;NM_001159567.1;NM_001159568.1;NM_010825.3;XM_017316112.1;XM_017316111.1;XM_006498865.3;XM_017316113.1;XM_006498864.3;XM_017316114.1;XM_006498871.3;XM_017316117.1;XM_017316104.1;XM_017316107.1;XM_017316109.1;XM_011239336.2;XM_011239337.2;XM_017316101.1;XM_017316108.1	Meis2;Meis2;Meis2;Meis2;Meis2;Meis2;Meis2;Meis2;Meis2;Meis2;Meis2;Meis2;Meis2;Meis2;Meis2;Meis2;Meis2;Meis2;Meis2;Meis2;Meis2	0;0;0;0;0;0;0;0;0;0;0;0;0;0;0;0;0;0;0;0;0	9.2	5.68919	4.15758	2.00483
Ythdc2	0.177663	-2.41415	7.33651e-14	1.85987e-12	148	264	1069	1250	mmu:240255	Probable ATP-dependent RNA helicase YTHDC2	WT_Only	chr18	44845409	44847068	1660	*	1660	10.98	Promoter (<=1kb)	18	44847793	44889715	41923	1	Ythdc2	XM_006525915.2	-725	XR_385990.3;NM_001163013.1;XM_006525915.2	Ythdc2;Ythdc2;Ythdc2	0;0;-725	10.98	7.05502	4.70139	3.10237
Cystm1	0.18329	-2.38289	1.20578e-26	7.66719e-25	1505	1088	7002	7145	mmu:66060	Cysteine-rich and transmembrane domain-containing protein 1	WT_Only	chr18	36366483	36367828	1346	*	1346	9.45	5' UTR	18	36348624	36393370	44747	1	Cystm1	NM_001081365.1	17859	NM_001081365.1	Cystm1	0	9.45	4.82049	3.57361	1.5162
Gm9926	0.18917	-2.33403	1.07942e-20	4.77304e-19	131	138	715	707	mmu:100503565	MCG147289	WT_Only	chr18	66511120	66511466	347	*	347	10.03	Exon (NR_040528.1/Gm9926, exon 3 of 3)	18	66504178	66511737	7560	1	Gm9926	NR_040528.1	6942	NR_040528.1	Gm9926	0	10.03	5.73854	4.05308	2.08087
Onecut2	0.206214	-2.19785	0.000354417	0.00210815	1324	3189	10541	11344	mmu:225631	One cut domain family member 2	WT_Only	chr18	64345129	64345724	596	*	596	8	Intron (NM_194268.2/Onecut2, intron 1 of 1)	18	64340364	64398488	58125	1	Onecut2	NM_194268.2	4765	NM_194268.2	Onecut2	0	8	4.87933	3.80923	1.43525
Hnf4a	0.207178	-2.20056	3.69117e-34	3.20902e-32	1630	1470	7019	7944	mmu:15378	Hepatocyte nuclear factor 4-alpha	WT_Only	chr2	163559733	163560214	482	*	482	10.21	Intron (XM_006498788.1/Hnf4a, intron 5 of 9)	2	163547160	163572907	25748	1	Hnf4a	XM_006498787.1	12573	XM_006498788.1;NM_001312906.1;NM_001312907.1;NM_008261.3;XM_006498787.1	Hnf4a;Hnf4a;Hnf4a;Hnf4a;Hnf4a	0;0;0;0;0	10.21	6.85776	4.7324	2.79776
Msmo1	0.216109	-2.13742	7.05605e-20	2.99114e-18	1450	1979	7778	8089	mmu:66234	Methylsterol monooxygenase 1	WT_Only	chr8	64722701	64723938	1238	*	1238	8.65	Exon (NM_025436.2/Msmo1, exon 3 of 6)	8	64718145	64733578	15434	2	Msmo1	NM_025436.2	9640	NM_025436.2	Msmo1	0	8.65	5.29417	3.9821	1.78958
Inpp4b	0.218683	-2.11227	1.14027e-08	1.58077e-07	130	275	848	1004	mmu:234515	Type II inositol 3,4-bisphosphate 4-phosphatase	WT_Only	chr8	81892542	81892855	314	*	314	9.62	Intron (XM_017312728.1/Inpp4b, intron 11 of 25)	8	81856206	82122560	266355	1	Inpp4b	XM_006530863.3	36336	XM_017312728.1;XM_006530854.2;XM_006530855.2;XM_006530856.2;XM_006530861.2;XM_011248351.2;XM_006530858.2;XM_017312729.1;NM_001024617.3;NM_001297591.1;NM_001297593.1;NM_001297596.1;XM_011248352.2;XM_017312726.1;XM_006530857.3;XM_006530862.3;XM_006530863.3	Inpp4b;Inpp4b;Inpp4b;Inpp4b;Inpp4b;Inpp4b;Inpp4b;Inpp4b;Inpp4b;Inpp4b;Inpp4b;Inpp4b;Inpp4b;Inpp4b;Inpp4b;Inpp4b;Inpp4b	0;0;0;0;0;0;0;0;0;0;0;0;0;0;0;0;0	9.62	6.21967	4.43065	2.36098
Ralgapa2	0.221852	-2.09786	2.68535e-25	1.58932e-23	1260	1134	4697	6094	mmu:241694	Ral GTPase-activating protein subunit alpha-2	WT_Only	chr2	146344833	146346815	1983	*	1983	8.89	Exon (XR_866277.2/Ralgapa2, exon 13 of 24)	2	146239876	146410259	170384	2	Ralgapa2	XR_866277.2	63444	XR_866277.2;XR_866276.2;XR_374470.3;XR_374469.3;XR_866275.2;XR_374468.3;NM_001033348.3;XM_006499519.3;XM_006499517.3	Ralgapa2;Ralgapa2;Ralgapa2;Ralgapa2;Ralgapa2;Ralgapa2;Ralgapa2;Ralgapa2;Ralgapa2	0;0;0;0;0;0;0;0;0	8.89	5.49954	4.07546	1.89688
Spry4	0.223077	-2.09407	1.47343e-22	7.40951e-21	271	280	1193	1277	mmu:24066	Protein sprouty homolog 4	WT_Only	chr18	38589140	38590794	1655	*	1655	10.05	5' UTR	18	38586265	38601268	15004	2	Spry4	NM_011898.2	10474	NM_011898.2	Spry4	0	10.05	6.61993	4.58039	2.69959
Sema3e	0.223129	-2.09092	3.63035e-30	2.66019e-28	2414	2589	10396	12026	mmu:20349	Semaphorin-3E	WT_Only	chr5	14225952	14227041	1090	*	1090	14.38	Exon (NM_011348.2/Sema3e, exon 8 of 17)	5	14025276	14256689	231414	1	Sema3e	NM_011348.2	200676	NM_011348.2	Sema3e	0	14.38	4.73605	2.98315	1.43164
Agrn	0.223524	-2.09277	6.76756e-20	2.87677e-18	898	647	3200	3712	mmu:11603	Agrin	WT_Only	chr4	156172712	156173220	509	*	509	9.09	Exon (XM_011250178.1/Agrn, exon 14 of 33)	4	156165290	156177885	12596	2	Agrn	XM_011250178.1	4665	XM_011250178.1;XM_017319921.1;XM_006538495.2;XM_011250177.2;XM_006538496.3;NM_021604.3;XM_006538494.3;XM_006538491.1;XM_006538492.1;XM_006538493.1;XM_011250176.1;XR_390724.1;XR_881417.2	Agrn;Agrn;Agrn;Agrn;Agrn;Agrn;Agrn;Agrn;Agrn;Agrn;Agrn;Agrn;Agrn	0;0;0;0;0;0;0;0;0;0;0;0;0	9.09	5.69069	4.16444	2.04787
Gm32148	0.229008	-2.05134	0.000736144	0.00406014	18	12	53	78			WT_Only	chr3	116920358	116920741	384	*	384	9	Intron (NM_023245.3/Palmd, intron 7 of 7)	3	116953110	116960082	6973	1	Gm32148	XR_375985.1	-32369	NM_023245.3	Palmd	0	9	4.66878	3.54391	1.43525
Sgms2	0.241835	-1.97564	8.0978e-30	5.76893e-28	5182	5259	20105	23069	mmu:74442	Phosphatidylcholine:ceramide cholinephosphotransferase 2	WT_Only	chr3	131338998	131339458	461	*	461	8.93	Intron (NM_028943.5/Sgms2, intron 2 of 5)	3	131318985	131344923	25939	2	Sgms2	NM_028943.5	5465	NM_028943.5;XM_011240249.2;XM_011240250.2;XM_006502197.3;XM_006502194.3;XM_006502193.2;XM_006502196.3;XM_006502199.3	Sgms2;Sgms2;Sgms2;Sgms2;Sgms2;Sgms2;Sgms2;Sgms2	0;0;0;0;0;0;0;0	8.93	4.42681	3.40069	1.22647
Abcb1a	0.243725	-1.96135	4.79478e-25	2.77376e-23	5602	5982	21153	26376	mmu:18671	Multidrug resistance protein 1A	WT_Only	chr5	8551382	8551842	461	*	461	12.21	Intron (NM_198620.1/Rundc3b, intron 5 of 9)	5	8567091	8748518	181428	1	Abcb1a	XM_006503555.3	-15249	NM_198620.1;XM_006503577.2;XM_006503578.2;XM_006503579.3	Rundc3b;Rundc3b;Rundc3b;Rundc3b	0;0;0;0	12.21	4.79794	3.22759	1.50427
Tm4sf4	0.256183	-1.89721	7.46277e-22	3.58866e-20	3891	3080	13090	14121	mmu:229302	Transmembrane 4 superfamily member 4	WT_Only	chr3	57433764	57435605	1842	*	1842	10.05	Exon (NM_145539.2/Tm4sf4, exon 3 of 5)	3	57425410	57441677	16268	1	Tm4sf4	NM_145539.2	8354	NM_145539.2	Tm4sf4	0	10.05	5.37867	3.83058	1.83384
Prelid2	0.260647	-1.86657	5.26327e-05	0.000387148	44	109	312	275	mmu:77619	Prelid2 protein	WT_Only	chr18	41928537	41929803	1267	*	1267	8.3	Intron (NM_029942.1/Prelid2, intron 4 of 6)	18	41875696	41951194	75499	2	Prelid2	NM_029942.1	21391	NM_029942.1	Prelid2	0	8.3	4.8831	3.76791	1.45865
Nudt17	0.271429	-1.81168	0.00087684	0.00473931	19	19	68	72	mmu:78373	Nucleoside diphosphate-linked moiety X motif 17	WT_Only	chr3	96712540	96714243	1704	*	1704	9.28	Exon (XM_006502188.3/Polr3c, exon 12 of 14)	3	96706067	96708934	2868	2	Nudt17	XR_375600.3	-3606	NM_001162925.1;NM_030094.1;XM_006502317.3;XM_006502316.3;XR_375600.3;XM_006502188.3;XM_006502187.3;XR_375595.2;XR_867239.2;NM_028925.1	Nudt17;Nudt17;Nudt17;Nudt17;Nudt17;Polr3c;Polr3c;Polr3c;Polr3c;Polr3c	-3980;-3980;-3619;-3616;-3606;0;0;0;0;0	9.28	5.95606	4.31033	2.17435
Tpd52	0.28224	-1.7542	1.39783e-22	7.05239e-21	1362	1319	4496	5003	mmu:21985	Tumor protein D52	WT_Only	chr3	8951580	8951968	389	*	389	8	Intron (XM_006530067.3/Tpd52, intron 2 of 6)	3	8929434	8963937	34504	2	Tpd52	XM_006530071.3	11969	XM_006530067.3;XM_006530068.3;XM_011248142.2;XM_011248143.2;XM_011248144.2;XM_011248145.2;XM_006530071.3;XM_006530065.3;XM_006530060.3;XM_011248141.2;XM_006530070.3;XM_006530066.3;NM_001025261.1;NM_001025262.1;NM_001025263.1;NM_001025264.1;NM_009412.2	Tpd52;Tpd52;Tpd52;Tpd52;Tpd52;Tpd52;Tpd52;Tpd52;Tpd52;Tpd52;Tpd52;Tpd52;Tpd52;Tpd52;Tpd52;Tpd52;Tpd52	0;0;0;0;0;0;0;0;0;0;0;0;0;0;0;0;0	8	4.87831	3.80857	1.43525
St3gal6	0.283851	-1.73662	0.00674298	0.027677	854	2150	5114	5469	mmu:54613	Type 2 lactosamine alpha-2,3-sialyltransferase	WT_Only	chr16	58487288	58487878	591	*	591	9.03	Intron (XM_017317085.1/St3gal6, intron 1 of 7)	16	58469742	58493767	24026	2	St3gal6	XM_017317085.1	5889	XR_001781937.1;XR_384915.2;XR_876120.1;XM_017317085.1;XM_011245974.2;XM_011245973.2;XM_011245972.2;XM_011245971.1;XM_011245975.1;XM_017317083.1;XM_006522387.2;XM_006522388.2;XM_017317084.1;NM_018784.2;XR_384577.3;XM_011245976.2	Gm33475;Gm33475;Gm33475;St3gal6;St3gal6;St3gal6;St3gal6;St3gal6;St3gal6;St3gal6;St3gal6;St3gal6;St3gal6;St3gal6;St3gal6;St3gal6	11336;11336;6444;0;0;0;0;0;0;0;0;0;0;0;0;0	9.03	5.79756	4.24683	2.04028
Gramd3	0.285176	-1.73879	3.02091e-10	5.16508e-09	111	116	378	418	mmu:107022	Putative uncharacterized protein	WT_Only	chr18	56473489	56474169	681	*	681	9.81	Exon (XM_011246800.1/Gramd3, exon 3 of 14)	18	56432132	56503792	71661	1	Gramd3	NM_026240.2	41357	XM_011246800.1;XM_006525494.1;NM_026240.2	Gramd3;Gramd3;Gramd3	0;0;0	9.81	4.78824	3.5053	1.4505
Gramd2	0.290381	-1.7063	6.36147e-07	6.79322e-06	68	92	242	309	mmu:546134	GRAM domain-containing protein 2	WT_Only	chr9	59678904	59679263	360	*	360	9.02	Promoter (<=1kb)	9	59679462	59718532	39071	1	Gramd2	XM_006511275.2	-199	XM_006511275.2;XM_006511271.3;XM_006511274.3;NM_001253883.1;NM_011099.3;XM_006510855.1;XM_011242674.1;XM_011242673.1;XM_006510856.2	Gramd2;Gramd2;Gramd2;Pkm;Pkm;Pkm;Pkm;Pkm;Pkm	-199;-706;-739;0;0;0;0;0;0	9.02	5.79253	4.24188	2.04426
Proser2	0.295295	-1.69099	8.31563e-11	1.55104e-09	159	136	480	519	mmu:227545	Proline and serine-rich protein 2	WT_Only	chr2	6111644	6112894	1251	*	1251	8.91	Intron (XM_011238976.2/Proser2, intron 3 of 4)	2	6098500	6130185	31686	2	Proser2	NM_001159657.1	17291	XM_011238976.2;NM_001159657.1;NM_144883.4	Proser2;Proser2;Proser2	0;0;0	8.91	5.5409	4.10485	1.89581
Ugdh	0.295587	-1.68831	7.90933e-23	4.04348e-21	7912	8050	26175	27826	mmu:22235	UDP-glucose 6-dehydrogenase	WT_Only	chr5	65415022	65415442	421	*	421	9.86	Intron (XM_006503862.3/Ugdh, intron 11 of 11)	5	65413207	65428377	15171	2	Ugdh	XM_006503862.3	12935	NM_001310612.1;NM_024471.5;XM_006503862.3;NM_009466.2	Lias;Lias;Ugdh;Ugdh	23525;23525;0;0	9.86	6.51174	4.55258	2.60772
Zfp35	0.312316	-1.59853	9.9978e-05	0.000686813	208	535	1143	1236	mmu:22694	Mszf20-1	WT_Only	chr18	23992557	23992893	337	*	337	9.26	Promoter (2-3kb)	18	23989634	24005371	15738	1	Zfp35	NM_011755.2	2923	NM_011755.2	Zfp35	0	9.26	4.39073	3.33632	1.2081
Car13	0.316658	-1.58489	9.76495e-09	1.36852e-07	504	781	1988	2070	mmu:71934	Carbonic anhydrase 13	WT_Only	chr3	14670419	14671827	1409	*	1409	8.29	Distal Intergenic	3	14641727	14663002	21276	1	Car13	NM_024495.5	28692	NA	NA	NA	8.29	4.80173	3.72129	1.43525
Pparg	0.317842	-1.58313	1.65788e-17	5.87823e-16	1061	977	3021	3391	mmu:19016	Peroxisome proliferator activated receptor gamma 2	WT_Only	chr6	115394696	115395067	372	*	372	8.92	Intron (XM_006505743.3/Pparg, intron 2 of 7)	6	115421735	115490293	68559	1	Pparg	XR_001785108.1	-26668	XM_006505743.3;NM_001127330.2;NM_001308352.1;XM_006505737.3;XM_006505739.2;XM_017321455.1;XM_017321456.1;XM_006505738.3;NM_001308354.1;XM_011241252.1	Pparg;Pparg;Pparg;Pparg;Pparg;Pparg;Pparg;Pparg;Pparg;Pparg	0;0;0;0;0;0;0;0;0;0	8.92	5.68966	4.19901	1.95759
Cul2	0.318334	-1.57381	6.57838e-06	5.83447e-05	404	834	1893	1996	mmu:71745	Cullin-2	WT_Only	chr18	3406496	3407552	1057	*	1057	9.37	Intron (XM_006526274.3/Cul2, intron 3 of 20)	18	3383434	3435404	51971	1	Cul2	XM_006526275.3	23062	XM_006526274.3;NM_029402.3;XM_006526275.3	Cul2;Cul2;Cul2	0;0;0	9.37	6.12769	4.38683	2.31453
Dnajc22	0.318764	-1.58343	1.21331e-13	3.00167e-12	776	617	2166	2204	mmu:72778	DnaJ homolog subfamily C member 22	WT_Only	chr15	99103138	99103602	465	*	465	8.14	Intron (XM_011245738.1/Dnajc22, intron 2 of 2)	15	99099484	99104709	5226	1	Dnajc22	NM_176835.2	3654	XM_011245738.1;XM_006521457.3;XM_006521459.3;NM_176835.2	Dnajc22;Dnajc22;Dnajc22;Dnajc22	0;0;0;0	8.14	5.00384	3.8697	1.51399
Zfp24	0.323219	-1.54987	5.26731e-06	4.78191e-05	410	815	1769	2021			WT_Only	chr18	24010686	24012239	1554	*	1554	9.18	3' UTR	18	24012267	24020771	8505	2	Zfp24	NM_021559.2	8532	XM_006526136.3;XM_006526137.3;NM_021559.2	Zfp24;Zfp24;Zfp24	0;0;8532	9.18	5.1887	3.82929	1.70488
Dcp2	0.324582	-1.54551	1.76496e-07	2.06691e-06	656	1112	2545	2902	mmu:70640	Putative uncharacterized protein	WT_Only	chr18	44396492	44396974	483	*	483	10.66	Intron (NM_027490.1/Dcp2, intron 2 of 10)	18	44380500	44424969	44470	1	Dcp2	NM_027490.1	15992	NM_027490.1	Dcp2	0	10.66	5.45421	3.79552	1.91103
Anxa4	0.327083	-1.54212	7.9756e-19	3.16311e-17	5086	5240	15310	16260	mmu:11746	Annexin A4	WT_Only	chr6	86754323	86755108	786	*	786	8.41	Exon (XM_011241156.2/Anxa4, exon 5 of 13)	6	86736840	86775122	38283	2	Anxa4	XM_011241156.2	20014	XM_011241156.2;XM_006505398.2;XM_006505397.2;NM_013471.2;XM_011241158.2	Anxa4;Anxa4;Anxa4;Anxa4;Anxa4	0;0;0;0;0	8.41	5.12055	3.90738	1.65773
Ankhd1	0.328524	-1.52522	3.10682e-08	4.07917e-07	894	1360	2972	3889	mmu:108857	Protein Ankhd1	WT_Only	chr18	36575805	36576397	593	*	593	8.7	Intron (NM_175375.3/Ankhd1, intron 2 of 33)	18	36560603	36658908	98306	1	Ankhd1	NM_175375.3	15202	NM_175375.3	Ankhd1	0	8.7	5.08311	3.84023	1.70585
Hspa4l	0.333496	-1.50673	7.02845e-08	8.74323e-07	2083	3397	7678	8754	mmu:18415	Heat shock 70 kDa protein 4L	WT_Only	chr3	40763845	40765196	1352	*	1352	8.48	Intron (XM_006500766.3/Hspa4l, intron 7 of 19)	3	40745613	40790365	44753	1	Hspa4l	NM_011020.3	18232	XM_006500766.3;XM_006500767.3;NM_011020.3	Hspa4l;Hspa4l;Hspa4l	0;0;0	8.48	5.20937	3.95584	1.69858
Iws1	0.338422	-1.48771	6.54768e-12	1.38782e-10	1172	1444	3538	4192	mmu:73473	Protein IWS1 homolog	WT_Only	chr18	32077804	32079655	1852	*	1852	9.16	Intron (XM_006526291.3/Iws1, intron 2 of 13)	18	32067734	32104331	36598	1	Iws1	XR_386017.2	10070	XM_006526291.3;XM_006526292.3;NM_173441.3;XR_386017.2	Iws1;Iws1;Iws1;Iws1	0;0;0;0	9.16	5.35734	3.94874	1.8432
Slc12a2	0.343725	-1.46661	7.42337e-08	9.18254e-07	4549	7260	16992	17364	mmu:20496	Solute carrier family 12 member 2	WT_Only	chr18	57884538	57887002	2465	*	2465	8.51	Intron (XM_006525732.2/Slc12a2, intron 1 of 25)	18	57878678	57946821	68144	1	Slc12a2	NM_009194.3	5860	XM_006525732.2;XR_001782351.1;XR_001782352.1;NM_009194.3	Slc12a2;Slc12a2;Slc12a2;Slc12a2	0;0;0;0	8.51	4.8506	3.7156	1.56338
Dram2	0.345826	-1.45026	0.0352435	0.106464	271	744	1401	1534	mmu:67171	DNA damage-regulated autophagy modulator protein 2	WT_Only	chr3	106554740	106555070	331	*	331	9.08	Intron (NM_001025582.2/Dram2, intron 2 of 6)	3	106547836	106574845	27010	1	Dram2	XM_006501929.3	6904	NM_001025582.2;NM_001286986.1;NM_001286987.1;NM_026013.3;XM_006501928.1;XM_006501929.3	Dram2;Dram2;Dram2;Dram2;Dram2;Dram2	0;0;0;0;0;0	9.08	4.95223	3.7022	1.54775
Trappc8	0.346513	-1.45239	3.25957e-06	3.07343e-05	570	1025	2222	2381	mmu:75964	Protein Trappc8	WT_Only	chr18	20821238	20823690	2453	*	2453	9.07	Intron (XM_006526333.3/Trappc8, intron 26 of 28)	18	20817224	20896078	78855	2	Trappc8	NM_177038.3	72388	XM_006526333.3;XM_011247030.2;XM_017318013.1;XM_011247028.2;XM_011247029.2;XM_011247031.2;XM_011247032.2;XM_011247033.2;XM_017318011.1;XM_017318012.1;XR_001782396.1;XR_001782397.1;XR_001782398.1;XR_001782399.1;NM_177038.3	Trappc8;Trappc8;Trappc8;Trappc8;Trappc8;Trappc8;Trappc8;Trappc8;Trappc8;Trappc8;Trappc8;Trappc8;Trappc8;Trappc8;Trappc8	0;0;0;0;0;0;0;0;0;0;0;0;0;0;0	9.07	5.63913	4.13517	1.96203
Smim3	0.347124	-1.46058	2.35361e-09	3.6145e-08	514	367	1236	1302	mmu:106878	Putative uncharacterized protein	WT_Only	chr18	60493571	60493955	385	*	385	9.15	Intron (XM_006525481.3/Smim3, intron 2 of 2)	18	60474191	60500050	25860	2	Smim3	XM_006525481.3	6095	XM_006525481.3;XM_011246797.1;NM_134133.2;XM_006525482.3	Smim3;Smim3;Smim3;Smim3	0;0;0;0	9.15	5.30634	3.90463	1.83615
Galnt1	0.347762	-1.44931	1.89966e-10	3.36386e-09	1721	2280	5436	6069	mmu:14423	Polypeptide N-acetylgalactosaminyltransferase 1	WT_Only	chr18	24226724	24227035	312	*	312	9.9	Intron (NM_013814.3/Galnt1, intron 1 of 12)	18	24246086	24286814	40729	1	Galnt1	XM_017317833.1	-19051	NM_013814.3;NM_001160404.1;XM_006525650.2	Galnt1;Galnt1;Galnt1	0;0;0	9.9	5.48565	3.91902	1.90241
Gm39170	0.352	-1.44349	0.0173305	0.0602126	30	14	61	64			WT_Only	chr8	46845804	46846115	312	*	312	8.63	Exon (NM_008391.4/Irf2, exon 9 of 9)	8	46826701	46829108	2408	2	Gm39170	XR_870416.2	-16696	NM_008391.4;XR_001778407.1;XM_006509288.3;XM_006509289.3;XM_011242175.2;XM_017312580.1	Irf2;Irf2;Irf2;Irf2;Irf2;Irf2	0;0;0;0;0;0	8.63	5.43908	4.07625	1.80317
C330018D20Rik	0.355355	-1.42036	3.74504e-07	4.13508e-06	154	201	486	513	mmu:77422	Glutaredoxin-like protein C5orf63 homolog	WT_Only	chr18	56971139	56971569	431	*	431	9.09	Promoter (2-3kb)	18	56957072	56974008	16937	2	C330018D20Rik	XM_006526348.3	2439	NM_029909.1;XM_006526348.3;XM_006526347.3;XM_006526351.3;XM_006526349.3;XM_006526350.3;XR_386254.1;XR_386255.1;XR_877450.1;XR_877451.1	C330018D20Rik;C330018D20Rik;C330018D20Rik;C330018D20Rik;C330018D20Rik;C330018D20Rik;Gm34632;Gm34632;Gm34632;Gm34632	0;0;0;0;0;0;45436;45436;45436;45436	9.09	5.27737	3.91064	1.80646
Rbpms	0.358815	-1.41017	4.05926e-14	1.06231e-12	1374	1217	3496	3725	mmu:19663	Putative uncharacterized protein	WT_Only	chr8	33836539	33837807	1269	*	1269	8.13	Intron (XM_006509037.3/Rbpms, intron 4 of 7)	8	33786201	33844187	57987	2	Rbpms	XM_017312621.1	6380	XM_006509037.3;XR_378783.3;NM_001042674.2;NM_001286168.1;NM_019733.3;XR_378782.2;XR_378780.2;XR_378781.2;XR_870205.1;XR_001778413.1;XM_017312621.1;XM_017312620.1;XM_006509034.3;XM_006509035.3;NM_001042675.2	Rbpms;Rbpms;Rbpms;Rbpms;Rbpms;Rbpms;Rbpms;Rbpms;Rbpms;Rbpms;Rbpms;Rbpms;Rbpms;Rbpms;Rbpms	0;0;0;0;0;0;0;0;0;0;0;0;0;0;0	8.13	4.63424	3.63255	1.40425
Klf5	0.362745	-1.39498	4.55602e-10	7.63704e-09	889	665	2025	2259	mmu:12224	Klf5 protein	WT_Only	chr14	99303709	99304022	314	*	314	8.71	Intron (NM_009769.4/Klf5, intron 3 of 3)	14	99298691	99313412	14722	1	Klf5	NM_009769.4	5018	NM_009769.4	Klf5	0	8.71	5.50066	4.10827	1.83532
Fam13b	0.367013	-1.36871	3.88044e-08	5.01783e-07	727	1002	2126	2585	mmu:225358	Protein FAM13B	WT_Only	chr18	34453474	34454370	897	*	897	9.45	Exon (XM_006525857.2/Fam13b, exon 7 of 14)	18	34440571	34464230	23660	2	Fam13b	XM_006525857.2	9860	XM_006525857.2;XM_006525858.2;XM_006525848.2;XM_006525850.2;XM_006525851.2;XM_006525852.3;XM_006525853.2;XM_006525854.2;XM_017317886.1;XM_006525849.3;NM_146084.1;XM_006525855.3	Fam13b;Fam13b;Fam13b;Fam13b;Fam13b;Fam13b;Fam13b;Fam13b;Fam13b;Fam13b;Fam13b;Fam13b	0;0;0;0;0;0;0;0;0;0;0;0	9.45	6.13513	4.39144	2.31673
LOC108167377	0.367521	-1.36362	0.0259358	0.0835113	15	28	51	66			WT_Only	chr18	76935100	76935436	337	*	337	8.47	Exon (XR_001782471.1/LOC108167377, exon 2 of 2)	18	76930225	76938853	8629	1	LOC108167377	XR_001782471.1	4875	NM_025409.3;XR_001782471.1	Ier3ip1;LOC108167377	0;0	8.47	4.9543	3.79256	1.60686
Arhgap12	0.36757	-1.36647	0.000225441	0.00141365	455	1023	1993	2028	mmu:75415	Rho GTPase-activating protein 12	WT_Only	chr18	6109048	6110034	987	*	987	9.06	Promoter (2-3kb)	18	6024448	6112367	87920	2	Arhgap12	XM_017318002.1	2333	XM_017318002.1;XM_006526314.1;XM_006526315.1;XM_006526316.1;XM_011247018.1;XM_017318001.1;NM_001039692.1;NM_029277.2	Arhgap12;Arhgap12;Arhgap12;Arhgap12;Arhgap12;Arhgap12;Arhgap12;Arhgap12	0;0;0;0;0;0;0;0	9.06	5.32679	3.95483	1.74274
Stard3	0.374363	-1.35088	1.39058e-09	2.19244e-08	794	602	1812	1917	mmu:59045	START domain containing 3, isoform CRA_c	WT_Only	chr11	98374718	98376589	1872	*	1872	8.49	Promoter (2-3kb)	11	98371751	98381112	9362	1	Stard3	XM_006533896.3	2967	XM_006533894.1;XR_388504.1;NM_021547.3;XM_006533897.3;XM_006533895.3;XM_006533896.3	Stard3;Stard3;Stard3;Stard3;Stard3;Stard3	0;0;0;0;0;0	8.49	4.73897	3.65502	1.42815
Zfp397	0.374574	-1.33921	0.000727554	0.00401564	227	542	1025	1028	mmu:69256	Protein Zfp397	WT_Only	chr18	23960175	23961303	1129	*	1129	10.47	3' UTR	18	23954688	23964671	9984	1	Zfp397	NM_027007.2	5487	XM_011246996.2;XM_011246997.2;NM_027007.2;XM_011247056.2;XR_877220.2;XM_011247054.2;XM_011247055.2;XM_006526394.3;XM_006526391.3;XM_006526392.3;XM_006526393.3	Zfp397;Zfp397;Zfp397;Zscan30;Zscan30;Zscan30;Zscan30;Zscan30;Zscan30;Zscan30;Zscan30	0;0;0;0;0;10160;10160;26024;26025;26025;26025	10.47	6.12728	4.21676	2.40339
Lgals9	0.378732	-1.33108	2.91145e-13	6.96755e-12	1687	1522	4034	4439	mmu:16859	Galectin-9	WT_Only	chr11	78967006	78967442	437	*	437	9.75	Intron (NM_001159301.1/Lgals9, intron 6 of 9)	11	78962979	78984924	21946	2	Lgals9	NM_001159301.1	17482	NM_001159301.1;NM_010708.2	Lgals9;Lgals9	0;0	9.75	6.44611	4.53119	2.54786
Cdc25c	0.380416	-1.32108	6.72333e-08	8.39761e-07	300	376	845	932	mmu:12532	M-phase inducer phosphatase 3	WT_Only	chr18	34744913	34745526	614	*	614	8.16	Promoter (<=1kb)	18	34732993	34744960	11968	2	Cdc25c	XM_011246819.1	0	XM_011246819.1;NM_009860.3;XM_006525551.2	Cdc25c;Cdc25c;Cdc25c	0;0;0	8.16	4.68698	3.66347	1.34788
Rnmt	0.38537	-1.30236	9.90315e-10	1.59071e-08	753	896	2017	2262	mmu:67897	mRNA cap guanine-N7 methyltransferase	WT_Only	chr18	68311341	68312425	1085	*	1085	9.24	Exon (XR_386009.3/Rnmt, exon 5 of 9)	18	68303605	68321909	18305	1	Rnmt	XM_006526197.3	7736	XR_386009.3;XM_011246991.2;NM_001170953.1;NM_026440.4;XM_006526193.3;XM_006526196.3;XM_006526194.3;XM_006526197.3	Rnmt;Rnmt;Rnmt;Rnmt;Rnmt;Rnmt;Rnmt;Rnmt	0;0;0;0;0;0;0;0	9.24	5.56536	4.07515	1.92442
Tcerg1	0.391091	-1.28118	5.08314e-09	7.47081e-08	1954	2506	5476	5928	mmu:56070	MCG127945, isoform CRA_a	WT_Only	chr18	42523151	42524072	922	*	922	8.81	Exon (XR_386004.3/Tcerg1, exon 4 of 24)	18	42511487	42575785	64299	1	Tcerg1	NR_110344.1	11664	XR_386004.3;XR_001782384.1;XR_001782385.1;XR_001782383.1;XR_001782386.1;XM_006526110.2;XM_006526112.3;XM_006526113.2;XM_006526111.3;XM_006526115.3;NM_001039474.1;NM_001289526.1;NR_110344.1	Tcerg1;Tcerg1;Tcerg1;Tcerg1;Tcerg1;Tcerg1;Tcerg1;Tcerg1;Tcerg1;Tcerg1;Tcerg1;Tcerg1;Tcerg1	0;0;0;0;0;0;0;0;0;0;0;0;0	8.81	4.77689	3.63255	1.45644
Hbegf	0.391255	-1.28615	4.52914e-11	8.73364e-10	907	802	2147	2221	mmu:15200	Proheparin-binding EGF-like growth factor	WT_Only	chr18	36505241	36506798	1558	*	1558	8.98	3' UTR	18	36504927	36515805	10879	2	Hbegf	NM_010415.2	9007	NM_010415.2	Hbegf	0	8.98	5.66157	4.16363	2.01751
Gm41719	0.391667	-1.28	0.0301568	0.0940772	17	30	61	59			WT_Only	chr18	46606980	46609989	3010	*	3010	9.89	5' UTR	18	46614579	46618344	3766	1	Gm41719	XR_877381.2	-4590	XM_006525626.3;NM_010120.5;XR_877381.2	Eif1a;Eif1a;Gm41719	0;0;-4590	9.89	5.74352	4.05622	2.15408
Adar	0.392726	-1.27869	8.7978e-10	1.42057e-08	763	630	1658	1889	mmu:56417	Adenosine deaminase acting on RNA	WT_Only	chr3	89734464	89735667	1204	*	1204	8.5	5' UTR	3	89730718	89753455	22738	1	Adar	NM_019655.3	3746	NM_001038587.4;XM_006501753.3;XM_006501752.3;XM_006501754.2;NM_001146296.1;NM_019655.3	Adar;Adar;Adar;Adar;Adar;Adar	0;0;0;0;0;0	8.5	4.93886	3.77927	1.63189
Hspa9	0.394442	-1.2673	9.85093e-07	1.01531e-05	10358	15786	32085	34196	mmu:15526	Stress-70 protein, mitochondrial	WT_Only	chr18	34938320	34952558	14239	*	14239	10.03	Promoter (1-2kb)	18	34937414	34954351	16938	2	Hspa9	NM_010481.2	1793	NM_010481.2	Hspa9	0	10.03	5.56232	3.94244	2.01104
Ss18	0.396193	-1.26327	2.19641e-11	4.34426e-10	1091	1115	2585	2983	mmu:268996	Protein SSXT	WT_Only	chr18	14633742	14634992	1251	*	1251	8.71	Intron (NM_001161369.1/Ss18, intron 8 of 9)	18	14625629	14682914	57286	2	Ss18	NM_001161369.1	47922	NM_001161369.1;NM_001161370.1;NM_001161371.1;NM_009280.2;XM_006525948.2	Ss18;Ss18;Ss18;Ss18;Ss18	0;0;0;0;0	8.71	5.50186	4.11155	1.82893
Haus1	0.396667	-1.2644	2.18204e-07	2.51327e-06	321	393	910	890	mmu:225745	HAUS augmin-like complex subunit 1	WT_Only	chr18	77778321	77782673	4353	*	4353	10.16	3' UTR	18	77757567	77773878	16312	2	Haus1	XM_011247072.2	-4443	NM_007505.2;XR_001782360.1;XM_017317892.1;XR_001782362.1;XM_011247072.2	Atp5a1;Haus1;Haus1;Haus1;Haus1	0;-4481;-4475;-4448;-4443	10.16	6.24852	4.34563	2.4517
Sort1	0.398577	-1.26504	0.000300502	0.00181933	139	85	287	275	mmu:20661	Sortilin	WT_Only	chr3	108276395	108277341	947	*	947	9.33	Intron (NM_011967.3/Psma5, intron 8 of 8)	3	108284053	108361519	77467	1	Sort1	XM_006501223.3	-6712	NM_011967.3	Psma5	0	9.33	5.36976	3.92905	1.81567
Mex3c	0.399025	-1.24786	8.98675e-05	0.000624044	913	1707	3144	3422	mmu:240396	MEX3C variant 6	WT_Only	chr18	73577010	73577535	526	*	526	8.37	3' UTR	18	73572705	73592578	19874	1	Mex3c	NM_001039214.4	4305	XM_011246932.2;NM_001039214.4	Mex3c;Mex3c	0;0	8.37	4.72046	3.65844	1.45527
Snrpd1	0.399063	-1.25753	2.99288e-10	5.12285e-09	1551	1260	3395	3649	mmu:20641	Small nuclear ribonucleoprotein Sm D1	WT_Only	chr18	10625632	10626980	1349	*	1349	8.66	Exon (NM_009226.4/Snrpd1, exon 3 of 4)	18	10617796	10628230	10435	1	Snrpd1	NM_009226.4	7836	NM_009226.4	Snrpd1	0	8.66	4.88053	3.71655	1.55454
Cxxc1	0.401543	-1.24979	3.93132e-09	5.89047e-08	1442	1109	3093	3260	mmu:74322	Putative uncharacterized protein	WT_Only	chr18	74218480	74220034	1555	*	1555	8.61	Promoter (2-3kb)	18	74216212	74221491	5280	1	Cxxc1	NM_028868.3	2268	XM_006526302.3;NM_028868.3	Cxxc1;Cxxc1	0;0	8.61	5.2618	3.96702	1.74276
Fech	0.40181	-1.24667	3.42155e-08	4.46194e-07	915	683	1853	2124	mmu:14151	Ferrochelatase, mitochondrial	WT_Only	chr18	64498836	64505715	6880	*	6880	8.89	3' UTR	18	64456542	64489097	32556	2	Fech	XR_385974.3	-9739	NM_001142950.1;NM_027350.3	Nars;Nars	0;0	8.89	5.18086	3.87765	1.715
Rock1	0.406977	-1.21669	0.00205467	0.00997391	510	1275	2108	2278	mmu:19877	Rho-associated protein kinase 1	WT_Only	chr18	10105625	10106059	435	*	435	8.8	Intron (NM_009071.2/Rock1, intron 14 of 32)	18	10064528	10181462	116935	2	Rock1	XR_001782350.1	75403	NM_009071.2;XR_001782350.1;XM_006525725.1	Rock1;Rock1;Rock1	0;0;0	8.8	4.83702	3.66647	1.45765
Mtpap	0.407544	-1.22172	1.06362e-06	1.08823e-05	380	506	1048	1126	mmu:67440	Putative uncharacterized protein	WT_Only	chr18	4395544	4397076	1533	*	1533	8.51	3' UTR	18	4375617	4398798	23182	1	Mtpap	XM_006526184.3	19927	NM_026157.2;XM_006526182.3;XM_006526183.3;XM_006526184.3	Mtpap;Mtpap;Mtpap;Mtpap	0;0;0;0	8.51	5.04095	3.84155	1.68121
Elp2	0.408623	-1.22233	6.35967e-12	1.35498e-10	2113	2019	4943	5169	mmu:58523	Elongator complex protein 2	WT_Only	chr18	24606481	24607774	1294	*	1294	9.36	Promoter (1-2kb)	18	24609653	24638812	29160	1	Elp2	XM_006526130.3	-1879	XM_006526129.3;NM_021448.2;XM_006526130.3;NM_139143.3	Elp2;Elp2;Elp2;Slc39a6	0;0;0;0	9.36	5.7833	4.18267	2.15991
Cd2ap	0.410484	-1.20814	5.48162e-06	4.95891e-05	4836	7536	14233	15907	mmu:12488	CD2-associated protein	WT_Only	chr17	42800461	42801290	830	*	830	8.64	Intron (XM_011246263.2/Cd2ap, intron 16 of 17)	17	42793193	42829167	35975	2	Cd2ap	XM_011246265.2	27877	XM_011246263.2;NM_009847.3;XM_011246265.2;XM_011246264.2;XR_001782031.1	Cd2ap;Cd2ap;Cd2ap;Cd2ap;Cd2ap	0;0;0;0;0	8.64	5.37843	4.037	1.80017
Anxa3	0.41083	-1.2122	6.36635e-12	1.35498e-10	8659	9215	20862	22645	mmu:11745	Annexin A3	WT_Only	chr5	96812028	96813864	1837	*	1837	10.37	Exon (NM_013470.2/Anxa3, exon 4 of 13)	5	96793385	96845968	52584	1	Anxa3	NM_013470.2	18643	NM_013470.2	Anxa3	0	10.37	5.96935	4.1428	2.2704
Psma5	0.411513	-1.21094	5.84318e-09	8.51466e-08	1665	1988	4440	4437	mmu:26442	Proteasome subunit alpha type-5	WT_Only	chr3	108263961	108266569	2609	*	2609	9.28	Exon (NM_011967.3/Psma5, exon 3 of 9)	3	108256926	108279952	23027	1	Psma5	NM_011967.3	7035	NM_011967.3	Psma5	0	9.28	5.3823	3.93796	1.85815
Zfp516	0.411996	-1.21099	3.91748e-08	5.06148e-07	1012	767	2034	2284	mmu:329003	Zinc finger protein 516	WT_Only	chr18	82931895	82932592	698	*	698	8.32	Intron (XM_006526504.3/Zfp516, intron 1 of 3)	18	82920668	83005271	84604	1	Zfp516	XM_006526498.1	11227	XM_006526504.3;NM_183033.2;XM_011247085.2;XM_006526502.3;XM_006526500.2;NM_001177464.1;XM_006526503.3;XM_006526501.3;XM_006526498.1	Zfp516;Zfp516;Zfp516;Zfp516;Zfp516;Zfp516;Zfp516;Zfp516;Zfp516	0;0;0;0;0;0;0;0;0	8.32	4.91729	3.78931	1.60202
Pfdn1	0.41328	-1.20151	1.25288e-09	1.98143e-08	1390	1579	3359	3825	mmu:67199	Putative uncharacterized protein	WT_Only	chr18	36440290	36440753	464	*	464	10.31	Intron (NM_026027.3/Pfdn1, intron 2 of 3)	18	36403679	36454495	50817	2	Pfdn1	NM_026027.3	13742	NM_026027.3	Pfdn1	0	10.31	5.93789	4.12212	2.24488
Txnl1	0.413336	-1.20536	5.08673e-05	0.000375618	1598	2642	5521	4737	mmu:53382	Putative uncharacterized protein	WT_Only	chr18	63671955	63673470	1516	*	1516	8.21	Intron (NM_016792.4/Txnl1, intron 6 of 7)	18	63662801	63692359	29559	2	Txnl1	NM_016792.4	18889	NM_016792.4	Txnl1	0	8.21	4.72441	3.67993	1.51059
Tnfrsf21	0.413462	-1.2027	3.69174e-09	5.55856e-08	825	938	2059	2205	mmu:94185	Putative uncharacterized protein	WT_Only	chr17	43065431	43066122	692	*	692	8	Intron (NM_178589.3/Tnfrsf21, intron 4 of 5)	17	43016555	43089188	72634	1	Tnfrsf21	NM_178589.3	48876	NM_178589.3	Tnfrsf21	0	8	4.86107	3.79738	1.43525
Ccdc68	0.414662	-1.19248	0.00025357	0.00156956	140	222	401	472	mmu:381175	Coiled-coil domain-containing protein 68	WT_Only	chr18	69947142	69947665	524	*	524	8.13	Exon (XM_006526070.3/Ccdc68, exon 7 of 13)	18	69925567	69969488	43922	1	Ccdc68	XM_011246972.2	21575	XM_006526070.3;XM_006526071.3;XM_006526076.3;XM_017317935.1;XM_006526075.3;XM_006526074.3;NM_201362.2;XM_011246971.2;XM_011246972.2	Ccdc68;Ccdc68;Ccdc68;Ccdc68;Ccdc68;Ccdc68;Ccdc68;Ccdc68;Ccdc68	0;0;0;0;0;0;0;0;0	8.13	4.58836	3.60219	1.39725
Ccdc50	0.414983	-1.19146	5.87327e-06	5.26065e-05	1821	2760	5091	5948	mmu:67501	Coiled-coil domain containing 50	WT_Only	chr16	27421595	27422435	841	*	841	8.75	Exon (XM_011246002.2/Ccdc50, exon 6 of 12)	16	27389907	27452218	62312	1	Ccdc50	XM_006522483.2	31688	XM_011246002.2;NM_001025615.3;NM_001289436.1;NM_026202.4;XM_006522483.2	Ccdc50;Ccdc50;Ccdc50;Ccdc50;Ccdc50	0;0;0;0;0	8.75	5.49096	4.09894	1.85032
Srp19	0.415694	-1.19588	4.01298e-09	6.00114e-08	617	665	1498	1586	mmu:66384	Signal recognition particle 19 kDa protein	WT_Only	chr18	34313327	34314475	1149	*	1149	9.01	Exon (XM_006525532.3/Apc, exon 15 of 15)	18	34331121	34336599	5479	1	Srp19	XM_006526155.1	-16646	XM_006525532.3;XM_006525529.3;XM_006525534.3;XM_006525538.3;XM_006525539.2;NM_007462.3;XM_006525530.1;XM_006525533.2;XM_017317804.1;XM_006525536.3;XM_006525531.1;XM_006525535.1	Apc;Apc;Apc;Apc;Apc;Apc;Apc;Apc;Apc;Apc;Apc;Apc	0;0;0;0;0;0;0;0;0;0;0;0	9.01	4.87668	3.67134	1.48604
Paip2	0.417828	-1.18552	7.29355e-06	6.3987e-05	1464	2225	4364	4465	mmu:67869	Putative uncharacterized protein	WT_Only	chr18	35583119	35584544	1426	*	1426	8.26	Exon (NM_010771.6/Matr3, exon 11 of 15)	18	35598606	35617153	18548	1	Paip2	XM_011246987.2	-14062	NM_010771.6	Matr3	0	8.26	4.83796	3.74551	1.54874
Sh3d19	0.419212	-1.18317	5.66281e-11	1.07846e-09	2979	2690	6276	7247	mmu:27059	SH3 domain-containing protein 19	WT_Only	chr3	86032862	86033511	650	*	650	8.38	Intron (XM_017319605.1/Sh3d19, intron 1 of 7)	3	86038834	86128994	90161	1	Sh3d19	XM_006501547.3	-5323	XM_017319605.1;XM_006501549.3;XM_006501546.3;XM_011240136.2;XM_011240135.2	Sh3d19;Sh3d19;Sh3d19;Sh3d19;Sh3d19	0;0;0;0;0	8.38	5.00434	3.83767	1.63069
Kdm3b	0.424269	-1.16427	4.58052e-09	6.7774e-08	1310	1155	2604	3206	mmu:277250	Lysine-specific demethylase 3B	WT_Only	chr18	34771951	34773289	1339	*	1339	8.56	3' UTR	18	34777008	34839370	62363	1	Kdm3b	NM_001081256.1	-3719	XM_006526152.2;NM_175104.4;XM_006526154.3;XM_006526151.3;XM_006526153.3;NM_001081256.1	Fam53c;Fam53c;Fam53c;Fam53c;Fam53c;Kdm3b	0;0;0;0;0;0	8.56	5.13278	3.89517	1.68456
Brd8	0.427578	-1.15503	1.07899e-10	1.98844e-09	2030	1905	4335	4868	mmu:78656	Bromodomain-containing protein 8	WT_Only	chr18	34619530	34620353	824	*	824	8.87	Intron (NM_001289606.1/Brd8, intron 2 of 20)	18	34599826	34623517	23692	2	Brd8	XM_011247042.1	3164	NM_001289606.1;NM_001289607.1;NM_030147.3;XM_011247042.1;XM_006526354.3;XM_006526355.3;XM_006526358.3;XM_011247038.2;XM_011247039.2;XM_011247040.2;XR_001782405.1;XR_001782404.1;XM_006526359.3;NM_001166407.1;NM_009004.4;NM_001166406.1	Brd8;Brd8;Brd8;Brd8;Brd8;Brd8;Brd8;Brd8;Brd8;Brd8;Brd8;Brd8;Brd8;Kif20a;Kif20a;Kif20a	0;0;0;0;0;0;0;0;0;0;0;0;0;-4271;-4583;-4680	8.87	4.76539	3.61742	1.432
Trmt13	0.427696	-1.14549	0.000212778	0.00134291	149	200	345	471	mmu:229780	Putative uncharacterized protein	WT_Only	chr3	116581384	116582751	1368	*	1368	8.1	3' UTR	3	116581093	116592512	11420	2	Trmt13	XM_011240110.2	9761	XM_006500863.2;XM_006500861.3;XM_006500862.3;XM_006500860.3;NM_175413.3;XM_006500865.3;XM_006500864.3;XM_017319564.1;XM_011240110.2;XM_006501424.1;XM_011240111.1;XM_011240112.2;XR_375521.2;NM_030016.2	Lrrc39;Lrrc39;Lrrc39;Lrrc39;Lrrc39;Lrrc39;Lrrc39;Trmt13;Trmt13;Trmt13;Trmt13;Trmt13;Trmt13;Trmt13	18432;18431;18430;18430;0;11318;10488;0;0;0;0;0;0;0	8.1	4.80034	3.74321	1.49227
Plch1	0.429382	-1.14305	3.96384e-07	4.34751e-06	1141	1431	2690	3300	mmu:269437	1-phosphatidylinositol 4,5-bisphosphate phosphodiesterase eta-1	WT_Only	chr3	63708968	63709302	335	*	335	8.76	Intron (XM_011240133.2/Plch1, intron 15 of 20)	3	63696199	63781301	85103	2	Plch1	XM_011240133.2	71999	XM_011240133.2;XM_011240134.2;XM_017319597.1;XM_017319594.1;XM_006501531.3;XM_006501537.3;XM_006501530.3;XM_006501533.3;XM_006501535.3;XM_011240131.2;XM_017319593.1;XM_017319595.1;XM_006501536.3;XM_017319599.1;XM_017319596.1;XM_017319600.1;NM_001177732.1;NM_001177733.1;NM_183191.3;XM_006501538.3;XM_017319598.1;XM_017319601.1;XM_006501541.3	Plch1;Plch1;Plch1;Plch1;Plch1;Plch1;Plch1;Plch1;Plch1;Plch1;Plch1;Plch1;Plch1;Plch1;Plch1;Plch1;Plch1;Plch1;Plch1;Plch1;Plch1;Plch1;Plch1	0;0;0;0;0;0;0;0;0;0;0;0;0;0;0;0;0;0;0;0;0;0;0	8.76	4.85116	3.6853	1.47806
Ctnna1	0.43215	-1.14021	9.74302e-11	1.80416e-09	10733	9521	22024	24844	mmu:12385	Catenin alpha-1	WT_Only	chr18	35214655	35215935	1281	*	1281	8.25	Promoter (<=1kb)	18	35215064	35254081	39018	1	Ctnna1	XM_006525548.3	0	NM_009818.1;XM_011246818.2;XM_006525548.3;NM_178005.4	Ctnna1;Ctnna1;Ctnna1;Lrrtm2	0;0;0;0	8.25	4.4359	3.48792	1.22872
Mien1	0.43224	-1.14128	1.62011e-07	1.91624e-06	389	402	909	921	mmu:103742	Migration and invasion enhancer 1	WT_Only	chr11	98434361	98436940	2580	*	2580	9.42	Promoter (2-3kb)	11	98437708	98438988	1281	2	Mien1	NM_025559.2	2048	NM_001003817.1;NM_025559.2	Erbb2;Mien1	0;2048	9.42	6.06336	4.3363	2.3142
Cdc23	0.43291	-1.13507	4.49818e-09	6.66841e-08	920	919	1950	2298	mmu:52563	Cell division cycle protein 23 homolog	WT_Only	chr18	34639847	34640937	1091	*	1091	8.14	Intron (XM_006526084.3/Cdc23, intron 9 of 16)	18	34631683	34651736	20054	2	Cdc23	NM_178347.4	10799	XM_006526084.3;NM_178347.4	Cdc23;Cdc23	0;0	8.14	4.35423	3.4512	1.1565
Abi3	0.43314	-1.14121	3.10837e-07	3.49391e-06	578	465	1200	1208	mmu:66610	ABI gene family, member 3	WT_Only	chr11	95833492	95834161	670	*	670	8	Exon (NM_025659.4/Abi3, exon 5 of 8)	11	95832131	95837822	5692	2	Abi3	XM_017314709.1	3661	NM_025659.4;NM_001163464.1;XM_017314709.1;XM_006533956.3;XM_017314707.1;XM_017314708.1;XM_017314710.1;NM_153104.3	Abi3;Abi3;Abi3;Abi3;Abi3;Abi3;Abi3;Phospho1	0;0;0;0;0;0;0;8992	8	4.87933	3.80923	1.43525
Cep192	0.433904	-1.12577	4.35273e-06	4.01077e-05	1483	2016	3540	4524	mmu:70799	Protein Cep192	WT_Only	chr18	67810432	67811359	928	*	928	9.71	Intron (XM_011247001.2/Cep192, intron 6 of 31)	18	67800107	67885170	85064	1	Cep192	NM_027556.1	10325	XM_011247001.2;XM_006526241.2;XM_006526242.2;XM_006526243.2;NM_027556.1	Cep192;Cep192;Cep192;Cep192;Cep192	0;0;0;0;0	9.71	4.77528	3.52191	1.46896
Tgoln1	0.435779	-1.12131	5.81025e-05	0.000422334	2087	3389	5920	6646	mmu:22134	Trans-golgi network protein	WT_Only	chr6	72611675	72613742	2068	*	2068	9.15	3' UTR	6	72608420	72617000	8581	2	Tgoln1	NM_009443.3	3258	NM_026159.4;NM_009443.3	Retsat;Tgoln1	13047;0	9.15	5.76632	4.20387	2.086
Sorbs2	0.437113	-1.11952	1.17161e-08	1.61983e-07	2220	2510	4956	5865	mmu:234214	Sorbs2 protein	WT_Only	chr8	45742459	45743019	561	*	561	8.75	Exon (NR_045739.1/Sorbs2os, exon 3 of 6)	8	45736155	45827796	91642	1	Sorbs2	XM_017312686.1	6304	NM_001205219.1;NM_172752.4;XM_006509386.1;XM_017312688.1;XM_017312693.1;XM_017312694.1;XM_017312695.1;XM_017312696.1;NM_001310707.1;XM_017312689.1;XM_006509385.1;NM_001310708.1;XM_011242198.1;XM_011242199.1;XM_011242200.1;XM_011242201.1;XM_011242202.1;XM_011242204.1;XM_011242205.1;XM_011242206.1;XM_011242207.1;XM_011242208.1;XM_011242209.1;XM_011242210.1;XM_011242212.1;XM_017312683.1;XM_017312684…	Sorbs2;Sorbs2;Sorbs2;Sorbs2;Sorbs2;Sorbs2;Sorbs2;Sorbs2;Sorbs2;Sorbs2;Sorbs2;Sorbs2;Sorbs2;Sorbs2;Sorbs2;Sorbs2;Sorbs2;Sorbs2;Sorbs2;Sorbs2;Sorbs2;Sorbs2;Sorbs2;Sorbs2;Sorbs2;Sorbs2;Sorbs2;Sorbs2;Sorbs2;Sorbs2;Sorbs2;Sorbs2;Sorbs2;Sorbs2;Sorbs2os	0;0;0;0;0;0;0;0;0;0;0;0;0;0;0;0;0;0;0;0;0;0;0;0;0;0;0;0;0;0;0;0;0;0;0	8.75	5.44585	4.065	1.84281
Mtmr11	0.438104	-1.12378	9.57404e-09	1.34421e-07	1552	1304	3214	3305	mmu:194126	Myotubularin-related protein 11	WT_Only	chr3	96149975	96152795	2821	*	2821	9.24	Exon (XM_006501385.3/Otud7b, exon 8 of 13)	3	96161946	96169914	7969	1	Mtmr11	XR_001783667.1	-9151	XM_006501385.3;XM_006501386.3;NM_001025613.1;NM_001025614.1;XM_017319546.1;XM_006501389.3;XM_017319547.1;XM_017319548.1	Otud7b;Otud7b;Otud7b;Otud7b;Otud7b;Otud7b;Otud7b;Otud7b	0;0;0;0;0;0;0;0	9.24	5.92859	4.28798	2.18004
Lgals3bp	0.439437	-1.11914	6.11671e-08	7.67106e-07	13691	10333	26220	28450	mmu:19039	Galectin-3-binding protein	WT_Only	chr11	118393040	118395481	2442	*	2442	9.07	Exon (NM_011150.2/Lgals3bp, exon 6 of 6)	11	118392752	118401931	9180	2	Lgals3bp	NM_011150.2	6450	NM_011150.2	Lgals3bp	0	9.07	5.4605	4.02129	1.8997
Impa2	0.439644	-1.11808	2.57964e-06	2.47324e-05	387	305	760	814	mmu:114663	Putative uncharacterized protein	WT_Only	chr18	67292503	67293460	958	*	958	8	Exon (XR_001782491.1/Gm30321, exon 3 of 3)	18	67289223	67318841	29619	1	Impa2	NM_053261.2	3280	XR_001782491.1;XR_001782492.1;XR_001782495.1;XR_001782496.1;XR_001782497.1;XR_386300.3;XR_877509.2;XR_386299.3;XR_001782493.1;XR_001782494.1;NM_053261.2	Gm30321;Gm30321;Gm30321;Gm30321;Gm30321;Gm30321;Gm30321;Gm30321;Gm30321;Gm30321;Impa2	0;0;0;0;0;0;0;0;0;0;0	8	4.71908	3.70527	1.39374
Zmat2	0.440784	-1.10905	1.62703e-07	1.91853e-06	932	1115	2213	2431	mmu:66492	Zinc finger matrin-type protein 2	WT_Only	chr18	36797583	36797920	338	*	338	9.22	Exon (NM_025594.3/Zmat2, exon 6 of 6)	18	36793923	36799660	5738	1	Zmat2	NM_025594.3	3660	NR_027885.1;NM_025594.3	Vaultrc5;Zmat2	-3843;0	9.22	5.13943	3.80295	1.71367
Map3k2	0.441523	-1.10112	0.00194648	0.00953293	1179	2566	4125	4357	mmu:26405	Mitogen activated protein kinase kinase kinase 2	WT_Only	chr18	32200269	32200996	728	*	728	9.77	Intron (NM_011946.3/Map3k2, intron 5 of 16)	18	32163089	32236751	73663	1	Map3k2	NM_011946.3	37180	NM_011946.3	Map3k2	0	9.77	5.27683	3.81284	1.8242
Cldn12	0.442225	-1.10294	7.57193e-06	6.62334e-05	3896	5622	10412	11111	mmu:64945	Claudin-12	WT_Only	chr5	5505094	5508495	3402	*	3402	16.9	5' UTR	5	5505109	5514544	9436	2	Cldn12	XM_006503598.3	6049	NM_001193660.1;NM_001193659.1;NM_001193661.1;NM_022890.2;XM_006503598.3;XM_011240673.2;XM_011240674.1	Cldn12;Cldn12;Cldn12;Cldn12;Cldn12;Cldn12;Cldn12	0;0;0;0;0;0;0	16.9	6.1118	3.37787	2.3535
Pggt1b	0.442494	-1.09837	0.000142916	0.000942242	375	583	990	1175	mmu:225467	Protein geranylgeranyltransferase type I, beta subunit	WT_Only	chr18	46247802	46248173	372	*	372	8.31	Intron (XM_006525866.3/Pggt1b, intron 7 of 8)	18	46235344	46280827	45484	2	Pggt1b	XM_006525866.3	32654	XM_006525866.3;XR_001782356.1;NM_172627.3	Pggt1b;Pggt1b;Pggt1b	0;0;0	8.31	4.68732	3.64374	1.41586
Usp53	0.443432	-1.09588	4.21479e-05	0.000315761	384	541	944	1142	mmu:99526	Inactive ubiquitin carboxyl-terminal hydrolase 53	WT_Only	chr3	122955769	122957394	1626	*	1626	8.05	Exon (XM_011240316.1/Usp53, exon 9 of 16)	3	122931486	122984350	52865	2	Usp53	XM_011240316.1	26956	XM_011240316.1;XM_011240315.1;XM_011240317.1;XM_011240313.1;XM_011240314.2;XM_017319820.1;NM_133857.3	Usp53;Usp53;Usp53;Usp53;Usp53;Usp53;Usp53	0;0;0;0;0;0;0	8.05	4.224	3.37759	1.08924
Nat10	0.445147	-1.09999	2.46225e-08	3.2716e-07	1062	910	2164	2266	mmu:98956	N-acetyltransferase 10	WT_Only	chr2	103733988	103735637	1650	*	1650	8.49	Exon (XR_374547.3/Nat10, exon 13 of 28)	2	103721259	103761250	39992	2	Nat10	NM_153126.2	25613	XR_374547.3;NM_153126.2;XM_006500455.3	Nat10;Nat10;Nat10	0;0;0	8.49	4.92324	3.77624	1.47258
Dnajc5	0.452604	-1.07273	2.68379e-09	4.09704e-08	1972	1843	3950	4479	mmu:13002	DnaJ homolog subfamily C member 5	WT_Only	chr2	181547125	181547753	629	*	629	8.78	Exon (XR_867108.2/Dnajc5, exon 3 of 6)	2	181520789	181552886	32098	1	Dnajc5	XM_011239923.2	26336	XR_867108.2;NM_001271584.1;NM_001271585.1;NM_016775.3;NR_073369.1;XM_011239923.2	Dnajc5;Dnajc5;Dnajc5;Dnajc5;Dnajc5;Dnajc5	0;0;0;0;0;0	8.78	5.56619	4.13807	1.88274
Dnajb14	0.457222	-1.05603	8.18393e-06	7.11092e-05	646	845	1576	1685	mmu:70604	DnaJ homolog subfamily B member 14	WT_Only	chr3	137866156	137866691	536	*	536	8.72	Promoter (<=1kb)	3	137867675	137908931	41257	1	Dnajb14	NM_001033155.1	-984	NM_001033155.1;XM_006502056.2;XM_006502055.2;NM_001316995.1;NM_016750.3;XR_001784008.1	Dnajb14;Dnajb14;Dnajb14;H2afz;H2afz;LOC108168904	-984;-1262;-1376;0;0;-1757	8.72	5.35226	4.00769	1.81331
Aacs	0.458459	-1.0598	1.2943e-06	1.30944e-05	2364	1747	4423	4544	mmu:78894	SUR5	WT_Only	chr5	125500294	125500651	358	*	358	10.15	Intron (NM_030210.1/Aacs, intron 5 of 17)	5	125475873	125517403	41531	1	Aacs	NM_030210.1	24421	NM_030210.1	Aacs	0	10.15	6.86944	4.7172	2.87927
Dbf4	0.459734	-1.04546	5.89291e-06	5.27209e-05	4474	6053	10655	12243	mmu:27214	DBF4 homolog (S. cerevisiae)	WT_Only	chr5	8397457	8398400	944	*	944	14.87	Exon (NM_001190717.1/Dbf4, exon 12 of 12)	5	8396969	8422716	25748	2	Dbf4	NM_001190717.1	24316	NM_001190717.1;NM_013726.3;XM_011240670.2	Dbf4;Dbf4;Dbf4	0;0;0	14.87	4.96793	3.04214	1.58058
Fam60a	0.459817	-1.04976	4.31254e-05	0.00032183	386	518	986	980	mmu:56306	Protein FAM60A	WT_Only	chr6	148924281	148926017	1737	*	1737	9.94	Exon (XM_006507075.2/Fam60a, exon 5 of 6)	6	148921057	148944801	23745	2	Fam60a	XM_006507075.2	18784	XM_006507075.2;XM_006507073.3;XM_006507074.3;NM_019643.3	Fam60a;Fam60a;Fam60a;Fam60a	0;0;0;0	9.94	5.31917	3.80956	1.86637
Eif1a	0.460653	-1.04161	0.000627156	0.00351958	1594	2849	4660	4985	mmu:13664	Putative uncharacterized protein	WT_Only	chr18	46602620	46603369	750	*	750	9.12	Intron (XM_006525626.3/Eif1a, intron 2 of 2)	18	46597704	46610225	12522	1	Eif1a	NM_010120.5	4916	XM_006525626.3;NM_010120.5	Eif1a;Eif1a	0;0	9.12	5.31564	3.92051	1.82555
Psmg2	0.461698	-1.04543	4.94193e-06	4.5185e-05	496	396	900	1032	mmu:107047	Proteasome assembly chaperone 2	WT_Only	chr18	67646073	67646746	674	*	674	10.35	Intron (NM_134138.1/Psmg2, intron 3 of 6)	18	67641599	67654162	12564	1	Psmg2	NM_134138.1	4474	XM_006525899.2;NM_001081073.1;NM_134138.1	Cep76;Cep76;Psmg2	-4804;-4737;0	10.35	6.28964	4.34491	2.43809
Cryz	0.462447	-1.04238	3.57991e-07	3.96314e-06	572	524	1120	1250	mmu:12972	Quinone oxidoreductase	WT_Only	chr3	154591951	154592450	500	*	500	8.28	Intron (NM_001168358.1/Tyw3, intron 3 of 4)	3	154596711	154623182	26472	1	Cryz	NM_009968.3	-4261	NM_009968.3;XM_006500973.2;XM_011240006.1;NM_001168358.1;NM_172474.5;XR_375504.3	Cryz;Cryz;Cryz;Tyw3;Tyw3;Tyw3	-4261;-4834;-4897;0;0;0	8.28	5.12291	3.92752	1.58929
Wdr33	0.46362	-1.03804	9.24063e-09	1.30334e-07	1719	1639	3408	3835	mmu:74320	pre-mRNA 3' end-processing protein WDR33	WT_Only	chr18	31842308	31844160	1853	*	1853	9.25	Intron (NM_028866.3/Wdr33, intron 7 of 21)	18	31804273	31907372	103100	1	Wdr33	XM_017317996.1	38035	NM_001170967.1;NM_001170970.1;NM_028866.3;XM_006526298.1;XM_006526300.1;XM_006526301.1;XM_017317996.1	Wdr33;Wdr33;Wdr33;Wdr33;Wdr33;Wdr33;Wdr33	38251;38251;0;0;0;0;0	9.25	5.21447	3.8447	1.72912
Fbxl20	0.463847	-1.03814	5.36468e-07	5.78093e-06	930	770	1700	1965	mmu:72194	F-box/LRR-repeat protein 20	WT_Only	chr11	98109937	98110461	525	*	525	8.12	Intron (XM_006534300.1/Fbxl20, intron 3 of 12)	11	98082554	98128371	45818	2	Fbxl20	XM_006534300.1	17910	XM_006534300.1;NM_028149.1;XM_006534299.3;XM_006534298.3	Fbxl20;Fbxl20;Fbxl20;Fbxl20	0;0;0;0	8.12	4.98669	3.86137	1.50315
Mbd2	0.464108	-1.03577	2.65934e-08	3.52168e-07	1856	1687	3508	4126	mmu:17191	Methyl-CpG-binding domain protein 2	WT_Only	chr18	70583664	70585210	1547	*	1547	8.02	Intron (XR_001782347.1/Mbd2, intron 2 of 7)	18	70568292	70626131	57840	1	Mbd2	NM_010773.2	15372	XM_006525710.3;XM_006525711.3;XR_001782347.1;NM_001311071.1;NM_010773.2	Mbd2;Mbd2;Mbd2;Mbd2;Mbd2	15395;15395;0;15372;0	8.02	4.69636	3.6877	1.42456
Atp9b	0.464576	-1.03897	3.23904e-07	3.6249e-06	863	737	1700	1744	mmu:50771	Phospholipid-translocating ATPase	WT_Only	chr18	80885999	80887633	1635	*	1635	11.01	Intron (NM_001201569.1/Atp9b, intron 5 of 29)	18	80735074	80891866	156793	2	Atp9b	XM_006526509.3	4233	NM_001201569.1;NM_015805.3;XM_006526509.3;XM_006526508.2;XM_006526506.2;XM_006526507.2;XR_001782381.1;XR_001782382.1	Atp9b;Atp9b;Atp9b;Atp9b;Atp9b;Atp9b;Atp9b;Atp9b	0;0;0;0;0;0;0;0	11.01	6.25778	4.17472	2.51387
Seh1l	0.465068	-1.02918	2.23251e-05	0.000177815	1402	1953	3395	3819	mmu:72124	Nucleoporin SEH1	WT_Only	chr18	67779799	67780155	357	*	357	9.76	Intron (XM_006526278.1/Seh1l, intron 2 of 8)	18	67774876	67795487	20612	1	Seh1l	NM_001039088.1	4923	NR_045376.1;XR_386302.2;XM_006526278.1;NM_028112.2;NM_001039088.1	4930549G23Rik;Gm26910;Seh1l;Seh1l;Seh1l	0;-4942;0;0;0	9.76	5.99906	4.2585	2.29256
Bin1	0.465186	-1.03682	7.61588e-07	7.98863e-06	1652	1281	3036	3269	mmu:30948	Myc box-dependent-interacting protein 1	WT_Only	chr18	32415144	32415933	790	*	790	8.42	Intron (XM_006525978.3/Bin1, intron 7 of 19)	18	32397593	32435740	38148	1	Bin1	XM_006525979.1	17551	XM_006525978.3;XM_006525980.3;XM_006525981.3;XM_006525982.3;XM_006525983.3;XM_006525984.3;XM_006525985.3;XM_006525986.3;XM_006525987.3;XM_006525988.3;XM_006525989.3;XM_006525990.3;XM_006525991.3;XM_006525992.3;XM_006525993.3;XM_006525994.3;XM_006525995.3;XM_017317916.1;XM_017317917.1;NM_001083334.1;NM_009668.2;XM_006525979.1	Bin1;Bin1;Bin1;Bin1;Bin1;Bin1;Bin1;Bin1;Bin1;Bin1;Bin1;Bin1;Bin1;Bin1;Bin1;Bin1;Bin1;Bin1;Bin1;Bin1;Bin1;Bin1	0;0;0;0;0;0;0;0;0;0;0;0;0;0;0;0;0;0;0;0;0;0	8.42	5.157	3.93028	1.6624
Xrn2	0.466652	-1.02439	7.36545e-05	0.000522784	1673	2497	4275	4661	mmu:24128	5'-3' exoribonuclease 2	WT_Only	chr2	147049362	147051229	1868	*	1868	8.12	Exon (XM_011239519.2/Xrn2, exon 22 of 25)	2	147024508	147078002	53495	1	Xrn2	XM_006499451.2	24854	XM_011239519.2;XM_006499450.3;NM_011917.2;XM_006499451.2	Xrn2;Xrn2;Xrn2;Xrn2	0;0;0;0	8.12	4.9715	3.85163	1.50268
2810403A07Rik	0.471273	-1.01187	1.19696e-06	1.21577e-05	882	1021	1887	2151	mmu:74200	UPF0469 protein KIAA0907	WT_Only	chr3	88688551	88693643	5093	*	5093	10.94	Promoter (2-3kb)	3	88685794	88712933	27140	1	2810403A07Rik	NM_028814.3	2757	XM_017319752.1;XR_001783760.1;XR_375589.1;XR_375591.1;XR_375592.1;XR_867238.1;NM_028814.3	2810403A07Rik;2810403A07Rik;2810403A07Rik;2810403A07Rik;2810403A07Rik;2810403A07Rik;2810403A07Rik	0;0;0;0;0;0;0	10.94	7.11937	4.70731	3.22465
Zfhx4	0.471277	-1.00417	0.000134541	0.000892766	1060	1475	2263	3116	mmu:80892	Zinc finger homeobox protein 4	WT_Only	chr3	5255111	5256188	1078	*	1078	8.93	Intron (XM_006530105.3/Zfhx4, intron 3 of 10)	3	5237495	5415861	178367	1	Zfhx4	XM_017319816.1	17616	XM_006530105.3;NM_030708.2;XM_006530104.2;XM_006530106.2;XM_017319816.1	Zfhx4;Zfhx4;Zfhx4;Zfhx4;Zfhx4	0;0;0;0;0	8.93	4.7948	3.62641	1.50968
Ash1l	0.474581	-0.997626	5.52332e-06	4.98491e-05	2204	2669	4492	5776	mmu:192195	Histone-lysine N-methyltransferase ASH1L	WT_Only	chr3	88968718	88969338	621	*	621	8.01	Promoter (2-3kb)	3	88965812	89079375	113564	1	Ash1l	NM_138679.5	2906	XM_006501142.2;XM_017319500.1;XR_001783666.1;XM_017319499.1;XM_006501141.2;NM_138679.5	Ash1l;Ash1l;Ash1l;Ash1l;Ash1l;Ash1l	0;0;0;0;0;0	8.01	4.55134	3.5945	1.38626
Ints3	0.475806	-1.00314	9.91808e-07	1.02155e-05	2115	1661	3755	4181	mmu:229543	Integrator complex subunit 3	WT_Only	chr3	90417458	90417853	396	*	396	8.32	Intron (NM_145540.3/Ints3, intron 3 of 29)	3	90391380	90433636	42257	2	Ints3	NM_145540.3	15783	NM_145540.3;NM_178876.3	Ints3;Ints3	0;0	8.32	5.04074	3.86912	1.57304
Rapgef2	0.478177	-0.990725	1.84498e-06	1.81642e-05	1326	1150	2269	2909	mmu:76089	Rap guanine nucleotide exchange factor 2	WT_Only	chr3	79063656	79064024	369	*	369	9.69	3' UTR	3	79062511	79144887	82377	2	Rapgef2	NM_001310536.1	80863	NM_001310536.1;XM_006502254.3;NM_001099624.3;XM_006502252.3;XM_006502250.3;XM_011240276.2;XM_011240277.2	Rapgef2;Rapgef2;Rapgef2;Rapgef2;Rapgef2;Rapgef2;Rapgef2	0;0;0;0;0;0;0	9.69	6.40341	4.52629	2.465
Ube2d2a	0.478201	-0.992886	0.000223916	0.00140523	973	1462	2600	2492	mmu:56550	Ubiquitin-conjugating enzyme E2 D2	WT_Only	chr18	35784219	35784582	364	*	364	8.55	Intron (NM_019912.2/Ube2d2a, intron 1 of 6)	18	35772030	35807168	35139	1	Ube2d2a	XM_006526120.2	12189	NM_019912.2;XM_006526120.2	Ube2d2a;Ube2d2a	0;0	8.55	4.70537	3.62092	1.39782
Gmeb2	0.48017	-0.986016	8.71925e-07	9.06566e-06	681	675	1304	1520	mmu:229004	Glucocorticoid modulatory element-binding protein 2	WT_Only	chr2	181266947	181267428	482	*	482	8.1	Intron (XM_011239938.1/Gmeb2, intron 1 of 8)	2	181251449	181278082	26634	2	Gmeb2	XM_011239938.1	10654	XM_011239938.1;XM_006500605.2;XM_006500602.2;XM_006500603.1;XM_006500604.1;XM_006500606.2;XM_011239937.1;NM_198169.2	Gmeb2;Gmeb2;Gmeb2;Gmeb2;Gmeb2;Gmeb2;Gmeb2;Gmeb2	0;0;0;0;0;0;0;0	8.1	4.82883	3.76281	1.48797
Api5	0.481351	-0.978033	0.00197907	0.00965871	1668	3120	4833	5114	mmu:11800	Apoptosis inhibitor 5	WT_Only	chr2	94424828	94426003	1176	*	1176	8.68	Exon (XM_006498589.1/Api5, exon 6 of 14)	2	94411727	94438181	26455	2	Api5	XM_006498589.1	12178	XM_006498589.1;NM_001305258.1;NM_007466.3	Api5;Api5;Api5	0;0;0	8.68	5.29406	3.98323	1.72099
Ppid	0.48167	-0.976722	0.0103936	0.0397754	1003	2400	3561	3504	mmu:67738	Peptidyl-prolyl cis-trans isomerase D	WT_Only	chr3	79594814	79596307	1494	*	1494	8.09	Promoter (<=1kb)	3	79595328	79603650	8323	1	Ppid	XM_006501943.2	0	NM_026352.3;XM_017319698.1;XM_006501943.2	Ppid;Ppid;Ppid	0;0;0	8.09	4.92128	3.82351	1.48489
Zfp871	0.486367	-0.95669	0.00837247	0.0330432	724	1577	2105	2626	mmu:208292	Protein Zfp871	WT_Only	chr17	32764801	32766292	1492	*	1492	8.53	3' UTR	17	32765496	32788287	22792	2	Zfp871	NM_172458.3	21995	NM_172458.3;XM_011246341.2	Zfp871;Zfp871	0;0	8.53	4.65501	3.5937	1.34332
Afg3l2	0.486834	-0.969849	9.43805e-08	1.15264e-06	2129	1920	4031	4286	mmu:69597	Putative uncharacterized protein	WT_Only	chr18	67421367	67422516	1150	*	1150	11.57	Intron (XM_011246998.1/Afg3l2, intron 10 of 16)	18	67404760	67448881	44122	2	Afg3l2	XM_011246998.1	26365	XM_011246998.1;NM_027130.1	Afg3l2;Afg3l2	0;0	11.57	5.71604	3.80592	2.10712
Krt7	0.48752	-0.971449	2.74137e-06	2.62176e-05	13275	10124	23922	24074	mmu:110310	Keratin, type II cytoskeletal 7	WT_Only	chr15	101420291	101423044	2754	*	2754	8.21	Exon (NM_033073.3/Krt7, exon 6 of 9)	15	101412403	101427806	15404	1	Krt7	NM_033073.3	7888	NM_033073.3	Krt7	0	8.21	4.99817	3.85626	1.53312
Reep5	0.488605	-0.965584	2.52386e-07	2.87469e-06	1389	1291	2721	2764	mmu:13476	Receptor expression-enhancing protein 5	WT_Only	chr18	34355783	34357613	1831	*	1831	8.74	Exon (NM_007874.3/Reep5, exon 3 of 5)	18	34344885	34373415	28531	2	Reep5	NM_007874.3	15802	NM_007874.3	Reep5	0	8.74	5.11222	3.85618	1.64181
Ptpn2	0.488808	-0.959876	3.70139e-05	0.000282245	816	1062	1863	1979	mmu:19255	Tyrosine-protein phosphatase non-receptor type 2	WT_Only	chr18	67681481	67682143	663	*	663	12.75	Exon (XM_011246859.1/Ptpn2, exon 3 of 8)	18	67665501	67711788	46288	2	Ptpn2	XM_011246859.1	29645	XM_011246859.1;XM_006525723.1;NM_001127177.1;NM_008977.3;XM_011246858.2	Ptpn2;Ptpn2;Ptpn2;Ptpn2;Ptpn2	0;0;0;0;0	12.75	4.76834	3.15674	1.47271
Mterf1a	0.489458	-0.960687	0.00297116	0.0137092	133	192	343	321	mmu:545725	Transcription termination factor 1b, mitochondrial	WT_Only	chr5	3890278	3891641	1364	*	1364	14.71	Promoter (<=1kb)	5	3864049	3891897	27849	2	Mterf1a	XR_001784727.1	256	XR_001784727.1;NM_001013023.2;NM_172135.2;XM_017321000.1;XM_017320999.1	Mterf1a;Mterf1a;Mterf1a;Mterf1a;Mterf1a	0;0;0;0;0	14.71	4.44637	2.81831	1.27529
Aldh7a1	0.490487	-0.961625	3.11339e-06	2.95187e-05	2755	2143	4911	5075	mmu:110695	Alpha-aminoadipic semialdehyde dehydrogenase	WT_Only	chr18	56575247	56576063	817	*	817	8.36	Promoter (2-3kb)	18	56525736	56572939	47204	2	Aldh7a1	NM_001127338.1	-2308	NM_001127338.1;NM_001162989.1;NM_019996.4	Aldh7a1;Phax;Phax	0;0;0	8.36	5.11555	3.9115	1.63181
Ncaph	0.491206	-0.956785	1.49058e-07	1.77945e-06	1598	1530	3115	3253	mmu:215387	Condensin complex subunit 2	WT_Only	chr2	127117958	127119057	1100	*	1100	10.58	Exon (NM_144818.3/Ncaph, exon 10 of 18)	2	127103809	127133954	30146	2	Ncaph	NM_144818.3	14897	NM_144818.3	Ncaph	0	10.58	7.15189	4.82989	3.11326
Fkbp1a	0.49122	-0.957266	3.51718e-08	4.57888e-07	7926	7264	15123	15800	mmu:14225	Peptidyl-prolyl cis-trans isomerase FKBP1A	WT_Only	chr2	151552595	151553906	1312	*	1312	8.64	Intron (NM_001302077.1/Fkbp1a, intron 2 of 4)	2	151543861	151561691	17831	1	Fkbp1a	XM_017315525.1	8734	NM_001302077.1;NM_001302078.1;NM_001302079.1;NM_001302080.1;NM_008019.3;NR_126058.1;XM_011239292.2;XM_017315525.1	Fkbp1a;Fkbp1a;Fkbp1a;Fkbp1a;Fkbp1a;Fkbp1a;Fkbp1a;Fkbp1a	0;0;0;0;0;0;0;0	8.64	5.35725	4.02497	1.7929
Rps3a2	0.492803	-0.946969	0.000306479	0.00185163	3197	4883	8056	8340	mmu:100043780	ribosomal protein S3A2	WT_Only	chr14	88123211	88123811	601	*	601	18.04	Promoter (<=1kb)	14	88122952	88123833	882	2	Rps3a2	Rps3a2	22	Rps3a2	Rps3a2	0	18.04	15.545	8.0494	10.7351
Gabpb2	0.49396	-0.942288	3.73141e-06	3.47994e-05	1789	2055	3520	4262	mmu:213054	GA-binding protein subunit beta-2	WT_Only	chr3	95197459	95199364	1906	*	1906	9.22	Intron (NM_029885.1/Gabpb2, intron 7 of 9)	3	95183191	95204729	21539	2	Gabpb2	XM_006501253.3	5365	NM_029885.1;NM_172512.2;XM_006501253.3;XM_006501250.3;XM_006501251.3;XM_006501252.3;XM_011240058.2;XM_011240059.2;XM_011240060.2;XM_011240061.2;XM_017319515.1	Gabpb2;Gabpb2;Gabpb2;Gabpb2;Gabpb2;Gabpb2;Gabpb2;Gabpb2;Gabpb2;Gabpb2;Gabpb2	0;0;0;0;0;0;0;0;0;0;0	9.22	5.39531	3.96859	1.87154
Eif2a	0.494479	-0.938856	0.000641743	0.00359488	1525	2416	3725	4245	mmu:229317	Eukaryotic translation initiation factor 2A	WT_Only	chr3	58522413	58523689	1277	*	1277	11.38	Promoter (2-3kb)	3	58525821	58557501	31681	1	Eif2a	NM_001005509.2	-2132	NM_001005509.2;XM_006501321.3;NM_030685.3	Eif2a;Eif2a;Serp1	-2132;-2222;0	11.38	5.31182	3.6306	1.77911
BC031181	0.495557	-0.940699	6.71054e-05	0.000481407	540	687	1207	1269	mmu:407819	UPF0729 protein C18orf32 homolog	WT_Only	chr18	75002971	75004740	1770	*	1770	8.49	Promoter (<=1kb)	18	75005274	75009934	4661	1	BC031181	XM_006526080.1	-534	XM_006526080.1;XM_006526081.3;NM_001001181.3;XM_006525996.1;NM_001002239.3;XM_017317918.1;XM_017317919.1;NR_028552.1	BC031181;BC031181;BC031181;Rpl17;Rpl17;Rpl17;Rpl17;Snord58b	-534;-852;-1160;0;0;0;0;1903	8.49	4.46031	3.47401	1.23081
Rbpj	0.497974	-0.931673	4.04735e-06	3.74958e-05	2867	3400	5848	6737	mmu:19664	J-kappa recombination signal binding protein	WT_Only	chr5	53649374	53650560	1187	*	1187	9.68	Exon (XM_006503797.3/Rbpj, exon 6 of 11)	5	53618917	53657361	38445	1	Rbpj	XM_006503796.3	30457	XM_006503797.3;NM_001080928.1;NM_001277116.1;NM_009035.5;NM_001080927.2;XM_017320743.1;XM_006503799.2;XM_017320742.1;XM_006503796.3	Rbpj;Rbpj;Rbpj;Rbpj;Rbpj;Rbpj;Rbpj;Rbpj;Rbpj	0;0;0;0;0;0;0;0;0	9.68	4.24333	3.1997	1.11775
Plat	0.499167	-0.933727	1.00261e-06	1.03129e-05	9591	7797	16510	18324	mmu:18791	Tissue-type plasminogen activator	WT_Only	chr8	22768492	22769192	701	*	701	8.43	Intron (NM_008872.3/Plat, intron 3 of 13)	8	22757722	22782848	25127	1	Plat	NM_008872.3	10770	NM_008872.3	Plat	0	8.43	5.18774	3.94751	1.67472
Odf2l	0.499286	-0.924892	0.000164898	0.0010693	606	793	1254	1548	mmu:52184	MKIAA1229 protein	WT_Only	chr3	145135094	145135463	370	*	370	10.88	Intron (XM_006501675.3/Odf2l, intron 8 of 17)	3	145129013	145153903	24891	1	Odf2l	XM_017319645.1	6081	XM_006501675.3;XM_006501678.3;NM_001162538.1;NM_001162539.1;NM_025714.4;XM_006501681.2;XM_011240162.2;XM_006501676.3;XM_006501677.3;XM_006501679.3;XM_006501680.3;XM_011240158.2;XM_011240159.2;XM_011240160.2;XM_011240161.2;XM_006501683.3;XM_006501682.3;XM_011240157.2;XM_017319642.1;XM_017319643.1;XM_017319644.1;XM_006501688.3;XM_017319645.1	Odf2l;Odf2l;Odf2l;Odf2l;Odf2l;Odf2l;Odf2l;Odf2l;Odf2l;Odf2l;Odf2l;Odf2l;Odf2l;Odf2l;Odf2l;Odf2l;Odf2l;Odf2l;Odf2l;Odf2l;Odf2l;Odf2l;Odf2l	0;0;0;0;0;0;0;0;0;0;0;0;0;0;0;0;0;0;0;0;0;0;0	10.88	5.92922	4.05084	2.23977
Hdac3	0.499608	-0.932328	2.16463e-07	2.5007e-06	1957	1870	3746	3914	mmu:15183	HDAC3 splicing HDAC3gamma	WT_Only	chr18	37952103	37952862	760	*	760	8.75	Promoter (2-3kb)	18	37936971	37954988	18018	2	Hdac3	NM_010411.2	2126	NM_175684.4;XM_006526003.3;NM_010411.2;XR_385976.3;XM_006525862.1;NM_153793.2	Fchsd1;Fchsd1;Hdac3;Hdac3;Rell2;Rell2	16869;16952;0;0;-2222;-2697	8.75	5.53991	4.1259	1.86455
Eif4ebp3	0.5	-0.930774	0.00487167	0.0209635	114	89	190	216	mmu:108112	Eukaryotic translation initiation factor 4E-binding protein 3	WT_Only	chr18	36640671	36642047	1377	*	1377	8	Exon (NM_175375.3/Ankhd1, exon 24 of 34)	18	36664060	36666324	2265	1	Eif4ebp3	NM_201256.4	-22013	NM_175375.3	Ankhd1	0	8	4.58456	3.61801	1.34558
Grn	2.00747	1.07117	3.18993e-07	3.57513e-06	11790	8907	5063	5247	mmu:14824	Granulins	WT_Only	chr11	102435321	102436599	1279	*	1279	8.87	3' UTR	11	102430322	102436809	6488	1	Grn	NM_008175.4	4999	NM_199200.2;XM_006533049.3;NM_008175.4	Fam171a2;Fam171a2;Grn	11064;11075;0	8.87	5.31405	3.96419	1.8209
Sdc1	2.02535	1.08428	4.62262e-07	5.02351e-06	18537	13577	7695	8161	mmu:20969	Syndecan-1	WT_Only	chr12	8790866	8791994	1129	*	1129	8	3' UTR	12	8785647	8793716	8070	1	Sdc1	XM_006515046.2	5219	NM_011519.2;XM_006515045.1;XM_006515046.2	Sdc1;Sdc1;Sdc1	0;0;0	8	4.87933	3.80923	1.43525
A430105I19Rik	2.02765	1.09491	3.05588e-05	0.000238096	447	433	187	247	mmu:214239	Uncharacterized protein C15orf52 homolog	WT_Only	chr2	118758735	118759728	994	*	994	8	Promoter (2-3kb)	2	118754153	118762476	8324	2	A430105I19Rik	XM_006499105.3	2748	NM_001001982.2;XM_006499105.3;XR_374437.3;XM_011239421.2	A430105I19Rik;A430105I19Rik;A430105I19Rik;A430105I19Rik	0;0;0;0	8	4.83748	3.78207	1.43525
Cdc42ep1	2.03147	1.0895	4.63728e-06	4.25766e-05	4868	3331	1903	2133	mmu:104445	Cdc42 effector protein 1	WT_Only	chr15	78847229	78849320	2092	*	2092	8.48	5' UTR	15	78842647	78850902	8256	1	Cdc42ep1	NM_027219.3	4582	NM_027219.3;NM_025622.3	Cdc42ep1;Lgals2	0;6209	8.48	5.21073	3.95316	1.6861
Hspa13	2.05065	1.11685	0.00171327	0.00853198	2290	4957	1645	1889	mmu:110920	Stress 70 protein chaperone, microsome-associated, human homolog, isoform CRA_b	WT_Only	chr16	75759949	75760485	537	*	537	8	Intron (NM_030201.3/Hspa13, intron 3 of 4)	16	75755190	75766818	11629	2	Hspa13	NM_030201.3	6333	NM_030201.3;NR_027492.1;XM_006522849.2	Hspa13;Hspa13;Hspa13	0;0;0	8	4.76414	3.73445	1.43525
Map1lc3a	2.0873	1.12463	0.000108632	0.000739002	628	424	256	248	mmu:66734	Microtubule-associated proteins 1A/1B light chain 3A	WT_Only	chr2	155290882	155291573	692	*	692	8.19	Intron (XM_006499333.1/Pigu, intron 11 of 11)	2	155276364	155278073	1710	1	Map1lc3a	NR_046364.1	14518	XM_006499333.1;NM_001004721.1	Pigu;Pigu	0;0	8.19	4.76349	3.70769	1.44496
Ahnak2	2.10338	1.14327	4.57962e-08	5.85309e-07	1866	1552	747	878	mmu:100041194	Protein Ahnak2	WT_Only	chr12	112781944	112782330	387	*	387	13.89	Intron (XM_017315330.1/Ahnak2, intron 7 of 9)	12	112772190	112802681	30492	2	Ahnak2	XM_017315330.1	20351	XM_017315330.1	Ahnak2	0	13.89	10.3474	6.16467	5.75935
Met	2.10787	1.15272	5.25902e-06	4.7772e-05	3836	5563	2056	2403	mmu:17295	Met protein	WT_Only	chr6	17522348	17522846	499	*	499	8	Intron (XM_011241043.2/Met, intron 4 of 21)	6	17463957	17573980	110024	1	Met	NM_008591.2	58391	XM_011241043.2;XM_006505002.3;XM_011241042.2;NM_008591.2	Met;Met;Met;Met	0;0;0;0	8	4.52066	3.57664	1.34058
Cflar	2.13489	1.16823	1.30346e-08	1.79086e-07	1512	1590	657	796	mmu:12633	CASP8 and FADD-like apoptosis regulator	WT_Only	chr1	58734111	58736207	2097	*	2097	8	Exon (XM_011238420.2/Cflar, exon 7 of 11)	1	58730552	58759209	28658	1	Cflar	NM_001293805.1	3559	XM_011238420.2;XM_011238421.2;NM_001289704.2;NM_001293804.1;XM_011238422.1;XM_011238423.2;XM_017313559.1;XM_006495635.3;XM_017313595.1;NM_009805.4;NM_207653.5;NM_001293805.1	Cflar;Cflar;Cflar;Cflar;Cflar;Cflar;Cflar;Cflar;Cflar;Cflar;Cflar;Cflar	0;0;0;0;0;0;0;0;0;20825;0;0	8	4.86684	3.80112	1.43525
Apobec3	2.14458	1.16993	2.96566e-10	5.08758e-09	4746	4124	1968	2168	mmu:80287	Apobec3 splice variant	WT_Only	chr15	79896535	79898281	1747	*	1747	8	Promoter (1-2kb)	15	79895165	79909247	14083	1	Apobec3	XM_017316807.1	1370	XM_017316808.1;XM_017316806.1;XR_001781583.1;NM_001160415.1;NM_030255.3;XM_006521551.2;XM_017316807.1;XM_006521553.3;NR_030675.1	Apobec3;Apobec3;Apobec3;Apobec3;Apobec3;Apobec3;Apobec3;Apobec3;D730005E14Rik	0;0;0;0;0;0;0;0;-3397	8	4.87264	3.80489	1.43525
Sqstm1	2.14664	1.16755	1.60309e-08	2.1811e-07	22567	17206	9165	9363	mmu:18412	Sequestosome-1	WT_Only	chr11	50202856	50204371	1516	*	1516	8.96	Exon (NM_001290769.1/Sqstm1, exon 6 of 8)	11	50200152	50210820	10669	2	Sqstm1	NM_001290769.1	6449	NM_026543.3;XM_006534037.3;NM_001290769.1;NM_011018.3	3010026O09Rik;3010026O09Rik;Sqstm1;Sqstm1	28005;12465;0;0	8.96	5.58048	4.12164	1.90982
Zfp263	2.16196	1.18419	3.09152e-07	3.48005e-06	1258	1572	641	668	mmu:74120	Protein Zfp263	WT_Only	chr16	3747371	3749617	2247	*	2247	8.61	Promoter (2-3kb)	16	3744774	3750790	6017	1	Zfp263	XM_006522653.2	2597	NM_148924.3;XM_006522653.2	Zfp263;Zfp263	0;0	8.61	5.41576	4.06579	1.78562
1700088E04Rik	2.1625	1.16249	0.034832	0.105428	111	62	50	30	mmu:27660	Protein 1700088E04Rik	WT_Only	chr15	79129949	79130392	444	*	444	8.59	Intron (XM_006521022.3/Micall1, intron 9 of 14)	15	79134655	79141251	6597	2	1700088E04Rik	NM_001310576.1	10859	NM_001310576.1;NM_001310579.1;NM_001310581.1;NM_138581.2;XM_006521022.3;XR_384014.3;NM_177461.1;XM_006521021.1;XM_006521024.1	1700088E04Rik;1700088E04Rik;1700088E04Rik;1700088E04Rik;Micall1;Micall1;Micall1;Micall1;Micall1	10859;10859;10859;10859;0;0;0;0;0	8.59	5.38134	4.04902	1.76635
Abr	2.16714	1.1866	1.98845e-09	3.0845e-08	4633	3847	1791	2122	mmu:109934	Active breakpoint cluster region-related protein	WT_Only	chr11	76455340	76456850	1511	*	1511	8.11	Exon (NM_001291186.1/Abr, exon 6 of 18)	11	76416732	76468465	51734	2	Abr	NM_001291186.1	11615	NM_001291186.1;NM_198018.2;NM_198895.2;NM_198894.2;XM_006531982.3	Abr;Abr;Abr;Abr;Abr	0;0;0;0;0	8.11	4.97535	3.85586	1.49597
Secisbp2l	2.16915	1.19063	8.27136e-10	1.34403e-08	2738	2943	1205	1414	mmu:70354	Selenocysteine insertion sequence-binding protein 2-like	WT_Only	chr2	125753709	125755641	1933	*	1933	8.6	Intron (NM_177608.3/Secisbp2l, intron 11 of 17)	2	125736991	125782858	45868	2	Secisbp2l	XM_006500156.3	27217	NM_177608.3;XM_006500156.3	Secisbp2l;Secisbp2l	0;0	8.6	4.95078	3.77312	1.57626
Nfkbiz	2.18573	1.20167	5.05876e-10	8.4065e-09	2880	2757	1155	1424	mmu:80859	NF-kappa-B inhibitor zeta	WT_Only	chr16	55812976	55813652	677	*	677	8.9	Intron (NM_001159394.1/Nfkbiz, intron 11 of 11)	16	55811377	55822138	10762	2	Nfkbiz	NM_001159394.1	8486	NM_001159394.1;NM_001159395.1;NM_030612.3	Nfkbiz;Nfkbiz;Nfkbiz	0;0;0	8.9	5.6451	4.17073	1.94797
Vat1	2.18893	1.1975	9.07506e-09	1.2841e-07	10215	7743	3929	4275	mmu:26949	Putative uncharacterized protein	WT_Only	chr11	101460827	101461810	984	*	984	8.69	Intron (NM_012037.2/Vat1, intron 4 of 5)	11	101458748	101466199	7452	2	Vat1	NM_012037.2	4389	NM_027320.4;NM_012037.2	Ifi35;Vat1	12415;0	8.69	5.49148	4.10291	1.83196
Nrip1	2.19485	1.20897	1.14485e-09	1.82182e-08	3520	3892	1525	1852	mmu:268903	Nuclear receptor-interacting protein 1	WT_Only	chr16	76309902	76310282	381	*	381	9.29	Intron (XR_876165.2/Gm30569, intron 1 of 1)	16	76287403	76324808	37406	2	Nrip1	XM_006523054.2	14526	XR_876165.2;XR_876166.2;XM_006523054.2;XM_017317020.1;XM_006523050.2;XM_006523051.3;NM_173440.2	Gm30569;Gm30569;Nrip1;Nrip1;Nrip1;Nrip1;Nrip1	0;0;0;0;0;0;0	9.29	6.03978	4.3558	2.21772
Card10	2.20958	1.21271	4.52694e-07	4.92648e-06	1409	1037	511	596	mmu:105844	Caspase recruitment domain-containing protein 10	WT_Only	chr15	78798345	78799627	1283	*	1283	8.1	Exon (XM_006520253.3/Card10, exon 4 of 21)	15	78775136	78803042	27907	2	Card10	NM_130859.2	3415	XM_006520253.3;NM_130859.2	Card10;Card10	0;0	8.1	4.88598	3.79935	1.47915
Ahnak	2.23945	1.2385	8.41879e-10	1.3651e-08	23903	28424	10643	12723	mmu:66395	Ahnak protein	WT_Only	chr19	9003348	9005030	1683	*	1683	9.35	Exon (XM_017318272.1/Ahnak, exon 5 of 6)	19	8990399	9019196	28798	1	Ahnak	XM_006527253.3	12949	XR_877684.2;XR_877685.2;XR_877686.2;XM_017318272.1;XM_006527256.3;NM_009643.2;NM_001039959.2;NM_001286518.1;NR_104460.1;XM_006527253.3	Ahnak;Ahnak;Ahnak;Ahnak;Ahnak;Ahnak;Ahnak;Ahnak;Ahnak;Ahnak	0;0;0;0;0;0;0;0;0;0	9.35	5.64839	4.08606	2.04103
Unc13d	2.26497	1.24557	2.87146e-06	2.73767e-05	892	621	322	346	mmu:70450	Protein unc-13 homolog D	WT_Only	chr11	116081056	116083967	2912	*	2912	8.89	Promoter (2-3kb)	11	116062095	116078195	16101	2	Unc13d	XM_006534189.2	-2861	XM_006534192.3;XM_006534190.2;XM_011249254.2;XM_006534188.2;XM_006534189.2;NM_001009573.2;XR_879738.2;NM_016852.2;XM_006533167.3;XR_001779973.1;XR_001779974.1	Unc13d;Unc13d;Unc13d;Unc13d;Unc13d;Unc13d;Unc13d;Wbp2;Wbp2;Wbp2;Wbp2	-3631;-3119;-3119;-2861;-2861;-3095;-3119;0;0;0;0	8.89	5.41885	4.02754	1.83282
Sh3d21	2.27049	1.24678	0.00160245	0.00807418	159	118	63	59	mmu:66938	SH3 domain-containing protein 21	WT_Only	chr4	126179338	126180658	1321	*	1321	10.35	Exon (XM_011240503.2/Thrap3, exon 4 of 12)	4	126150602	126163998	13397	2	Sh3d21	XM_017320358.1	-15340	XM_011240503.2;XM_006503041.3;NM_146153.3	Thrap3;Thrap3;Thrap3	0;0;0	10.35	6.34226	4.37749	2.49889
Ctsb	2.27862	1.2555	2.45121e-11	4.82342e-10	17471	14457	6823	7189	mmu:13030	Cathepsin B	WT_Only	chr14	63142321	63143100	780	*	780	12.18	3' UTR	14	63135649	63143156	7508	1	Ctsb	XM_017315833.1	6672	NM_007798.3;XM_017315833.1;NM_010191.3;XM_006518547.3;XM_017315844.1	Ctsb;Ctsb;Fdft1;Fdft1;Fdft1	0;0;36478;18550;38587	12.18	8.87163	5.57588	4.52436
Csf3	2.32326	1.28362	1.13392e-05	9.58719e-05	445	324	157	174	mmu:12985	Granulocyte colony-stimulating factor	WT_Only	chr11	98690962	98692727	1766	*	1766	8.11	Exon (NM_009439.1/Psmd3, exon 6 of 12)	11	98700897	98704503	3607	1	Csf3	XM_006532128.3	-8170	XR_001780319.1;XR_880201.2;NM_009439.1	Gm38985;Gm38985;Psmd3	8928;8928;0	8.11	4.44985	3.5153	1.2777
Tmem184b	2.34963	1.29873	2.58688e-09	3.96089e-08	7123	5229	2545	2712	mmu:223693	Transmembrane protein 184B	WT_Only	chr15	79365214	79366067	854	*	854	8	Exon (XM_006520810.3/Tmem184b, exon 3 of 6)	15	79360684	79369641	8958	2	Tmem184b	XM_006520810.3	3574	XM_006520810.3;XM_011245585.2;XM_006520807.3;XM_006520806.2;NM_001253817.1;XM_006520804.2;XM_006520805.3;NM_001253820.1;NM_001253819.1;NM_172608.1	Tmem184b;Tmem184b;Tmem184b;Tmem184b;Tmem184b;Tmem184b;Tmem184b;Tmem184b;Tmem184b;Tmem184b	0;0;0;0;0;0;0;0;0;0	8	4.86955	3.80289	1.43525
Prdx6	2.36455	1.30859	8.61338e-13	1.97236e-11	10158	8853	3979	4061	mmu:11758	Peroxiredoxin-6	WT_Only	chr1	161243560	161244312	753	*	753	8.59	Exon (NM_001303408.1/Prdx6, exon 4 of 6)	1	161240112	161251210	11099	2	Prdx6	NM_001303408.1	6898	NM_001303408.1;NM_007453.4;NR_130150.1	Prdx6;Prdx6;Prdx6	0;0;0	8.59	5.39095	4.05723	1.76001
Parvb	2.37791	1.31775	2.29169e-09	3.52998e-08	4044	2997	1392	1569	mmu:170736	Beta-parvin	WT_Only	chr15	84271451	84272444	994	*	994	10.21	Intron (NM_133167.3/Parvb, intron 2 of 12)	15	84260646	84313273	52628	1	Parvb	XM_006520534.3	10805	NM_133167.3;XM_006520532.2;XM_006520534.3	Parvb;Parvb;Parvb	0;0;0	10.21	6.50662	4.46982	2.6768
Vmac	2.45161	1.36119	1.63974e-05	0.000134143	239	217	93	93	mmu:106639	Expressed sequence AI662250, isoform CRA_a	WT_Only	chr17	56704640	56705022	383	*	383	8	Intron (NM_001252466.1/Ranbp3, intron 8 of 16)	17	56713936	56716608	2673	2	Vmac	XM_006523409.2	11586	NM_001252466.1;NM_001252467.1;NM_027933.3;NR_045519.1;XM_006524945.3;XR_001782113.1;XM_017317650.1;XM_017317646.1;XM_017317645.1;XM_006524944.2;XM_017317647.1;XM_017317648.1;XM_017317649.1;XM_011246620.1;XM_017317651.1	Ranbp3;Ranbp3;Ranbp3;Ranbp3;Ranbp3;Ranbp3;Ranbp3;Ranbp3;Ranbp3;Ranbp3;Ranbp3;Ranbp3;Ranbp3;Ranbp3;Ranbp3	0;0;0;0;0;0;0;0;0;0;0;0;0;0;0	8	4.82828	3.77609	1.43525
Itgb4	2.5129	1.39785	4.35885e-10	7.3145e-09	3073	2282	994	1137	mmu:192897	Integrin beta-4	WT_Only	chr11	115960322	115961838	1517	*	1517	9.06	Exon (XM_006533824.1/Sap30bp, exon 5 of 10)	11	115974725	116008411	33687	1	Itgb4	NM_001005608.2	-12887	XM_006533824.1;XM_006533823.2;NM_020483.3	Sap30bp;Sap30bp;Sap30bp	0;0;0	9.06	4.9744	3.72237	1.64197
Oxr1	2.56429	1.43258	1.65571e-11	3.34796e-10	6052	7549	2499	2805	mmu:170719	OXR1 short isoform C7C	WT_Only	chr15	41800086	41802164	2079	*	2079	8.3	Exon (XR_001781502.1/Oxr1, exon 5 of 18)	15	41789515	41861048	71534	1	Oxr1	NM_130885.2	10571	XR_001781502.1;XM_017316491.1;NM_001130166.1;XM_017316490.1;XR_001781499.1;XR_001781500.1;XR_001781501.1;XM_006520527.2;XM_006520526.3;XM_006520524.3;NM_001130165.1;NM_001130163.1;NM_130885.2	Oxr1;Oxr1;Oxr1;Oxr1;Oxr1;Oxr1;Oxr1;Oxr1;Oxr1;Oxr1;Oxr1;Oxr1;Oxr1	0;0;0;0;0;0;0;0;0;0;0;0;0	8.3	5.11792	3.92188	1.59233
Cbx4	2.56505	1.42196	2.18386e-08	2.9324e-07	1161	850	404	380	mmu:12418	E3 SUMO-protein ligase CBX4	WT_Only	chr11	119080824	119081674	851	*	851	8.58	3' UTR	11	119077571	119086237	8667	2	Cbx4	NM_007625.2	4563	NM_007625.2	Cbx4	0	8.58	5.30943	4.0058	1.74892
Plec	2.56543	1.42491	2.31793e-10	4.04403e-09	18051	12729	5819	6179	mmu:18810	Plectin	WT_Only	chr15	76175470	76176248	779	*	779	8.23	Exon (NM_201394.2/Plec, exon 32 of 32)	15	76170974	76195710	24737	2	Plec	NM_201394.2	19462	NM_201394.2;NM_201393.2;NM_201392.2;NM_001163549.1;NM_201391.2;NM_201390.2;NM_001163540.1;NM_201389.2;NM_001164203.1;NM_201388.2;NM_201387.3;NM_201386.2;NM_201385.2;NM_001163542.1;NM_011117.2	Plec;Plec;Plec;Plec;Plec;Plec;Plec;Plec;Plec;Plec;Plec;Plec;Plec;Plec;Plec	0;0;0;0;0;0;0;0;0;0;0;0;0;0;0	8.23	5.08116	3.90725	1.56289
Cbx6	2.61866	1.45537	6.46456e-12	1.37209e-10	7330	5525	2379	2530	mmu:494448	Chromobox protein homolog 6	WT_Only	chr15	79826886	79828227	1342	*	1342	9.16	3' UTR	15	79823898	79834333	10436	2	Cbx6	NM_028763.3	6106	NM_028763.3;NM_001013360.2;NM_001013362.2	Cbx6;Npcd;Npcd	0;0;0	9.16	5.9146	4.29389	2.141
Sh3pxd2a	2.62867	1.46358	1.40837e-11	2.86135e-10	4583	3466	1414	1648	mmu:14218	SH3 and PX domain-containing protein 2A	WT_Only	chr19	47267122	47268478	1357	*	1357	9.38	Promoter (<=1kb)	19	47260174	47269436	9263	2	Sh3pxd2a	XM_006526670.3	958	XM_006526670.3;NM_001164717.1;NM_008018.4;XM_006526669.3	Sh3pxd2a;Sh3pxd2a;Sh3pxd2a;Sh3pxd2a	0;0;0;0	9.38	6.11611	4.39331	2.26354
Sh3bp2	2.69906	1.50277	5.54651e-09	8.11308e-08	993	729	286	352	mmu:24055	SH3 domain-binding protein 2	WT_Only	chr5	34556112	34556791	680	*	680	8.39	Intron (NM_011893.3/Sh3bp2, intron 5 of 12)	5	34549576	34563639	14064	1	Sh3bp2	NM_001145859.1	6536	NM_011893.3;XM_006503954.1;NM_001145858.1;XM_006503955.1;NM_001145859.1	Sh3bp2;Sh3bp2;Sh3bp2;Sh3bp2;Sh3bp2	0;0;0;0;0	8.39	4.8518	3.73942	1.51671
Bcl6	2.83444	1.56683	1.66304e-09	2.59612e-08	716	568	235	218	mmu:12053	B-cell lymphoma 6 protein homolog	WT_Only	chr16	23969086	23970043	958	*	958	8.52	Exon (NM_009744.3/Bcl6, exon 7 of 10)	16	23965171	23981815	16645	2	Bcl6	XM_017316855.1	11772	NM_009744.3;XM_017316855.1	Bcl6;Bcl6	0;0	8.52	4.84567	3.71735	1.50156
Gm38424	3.07273	1.70572	0.00162593	0.00817374	77	92	18	37			WT_Only	chr5	31603155	31603481	327	*	327	8	Intron (XR_868330.1/Gm38424, intron 2 of 5)	5	31595752	31663432	67681	1	Gm38424	XR_868331.1	7403	XR_868330.1;XR_868331.1	Gm38424;Gm38424	0;0	8	4.68424	3.68258	1.43525
Gpx1	3.11081	1.70134	7.21889e-13	1.66334e-11	5509	3811	1491	1505	mmu:14775	Glutathione peroxidase 1	WT_Only	chr9	108336836	108337162	327	*	327	8	Promoter (1-2kb)	9	108339080	108340342	1263	1	Gpx1	NM_008160.6	-1918	NM_008160.6;NM_016802.5;NM_001313961.1;NM_001313962.1	Gpx1;Rhoa;Rhoa;Rhoa	-1918;0;0;0	8	4.87933	3.80923	1.43525
Myo10	3.11103	1.70746	1.21657e-16	3.99159e-15	7424	5829	1953	2307	mmu:17909	Unconventional myosin-X	WT_Only	chr15	25733683	25734119	437	*	437	8.16	Exon (NM_019472.2/Myo10, exon 11 of 41)	15	25758164	25813530	55367	1	Myo10	XM_006520025.3	-24045	NM_019472.2	Myo10	0	8.16	4.88935	3.79297	1.5091
Vegfa	3.30637	1.79067	3.35641e-15	9.70835e-14	11586	8153	2909	3061	mmu:22339	Vascular endothelial growth factor A isoform 5	WT_Only	chr17	46017918	46027364	9447	*	9447	8.39	Promoter (<=1kb)	17	46016993	46025163	8171	2	Vegfa	NM_001110266.1	0	NM_001110266.1;NM_001110267.1;NM_001110268.1;NM_001025250.3;NM_001025257.3;NM_001287056.1;NM_001287057.1;NM_001287058.1;NM_001317041.1;NM_009505.4	Vegfa;Vegfa;Vegfa;Vegfa;Vegfa;Vegfa;Vegfa;Vegfa;Vegfa;Vegfa	0;0;0;0;0;0;0;0;0;0	8.39	5.191	3.95447	1.65228
Fosl2	3.49339	1.8747	8.52051e-25	4.83814e-23	3806	3593	1010	1108	mmu:14284	Fos-related antigen 2	WT_Only	chr5	32146942	32148132	1191	*	1191	10.22	Exon (NM_008037.4/Fosl2, exon 2 of 4)	5	32136472	32157840	21369	1	Fosl2	NM_008037.4	10470	NM_008037.4	Fosl2	0	10.22	6.92996	4.74913	2.90848
App	3.53272	1.88941	2.79707e-23	1.4541e-21	33389	27183	8134	9012	mmu:11820	Amyloid beta A4 protein	WT_Only	chr16	85101100	85102538	1439	*	1439	10.18	Intron (XM_006522873.2/App, intron 3 of 14)	16	84954436	85173707	219272	2	App	NM_001198823.1	71169	XM_006522873.2;NM_001198823.1;NM_001198824.1;NM_001198825.1;NM_001198826.1;NM_007471.3;XM_006522874.1	App;App;App;App;App;App;App	0;0;0;0;0;0;0	10.18	6.81856	4.70182	2.79577
Cav1	3.74772	1.98267	6.14461e-14	1.56805e-12	4240	6426	1331	1515	mmu:12389	Caveolin-1	WT_Only	chr6	17339105	17341010	1906	*	1906	10.94	3' UTR	6	17307640	17341328	33689	1	Cav1	NM_001243064.1	31465	NM_007616.4;XM_006504974.1;XM_006504975.1;XM_006504976.1;NM_001243064.1	Cav1;Cav1;Cav1;Cav1;Cav1	0;0;0;0;0	10.94	6.49234	4.38313	2.64172
LOC102634900	3.75	1.97985	0.0337189	0.102787	18	27	6	6	mmu:102634900	uncharacterized LOC102634900	WT_Only	chr3	7542464	7543222	759	*	759	9	Intron (XM_006530086.1/Zc2hc1a, intron 9 of 9)	3	7576267	7688811	112545	1	LOC102634900	XR_878665.1	-33045	XM_006530086.1;NM_173181.3	Zc2hc1a;Zc2hc1a	0;0	9	4.5848	3.49123	1.38478
Bcl2l15	3.88889	2.02997	7.48017e-05	0.000529217	76	99	23	22	mmu:229672	Bcl-2-like protein 15	WT_Only	chr3	103842381	103842713	333	*	333	9.38	Intron (XM_011240103.2/Bcl2l15, intron 3 of 3)	3	103832696	103854618	21923	1	Bcl2l15	NM_001142960.1	9685	XM_011240103.2;XR_867215.2;NM_001142959.1;NM_001142960.1	Bcl2l15;Bcl2l15;Bcl2l15;Bcl2l15	0;0;9685;0	9.38	5.4633	3.98032	1.89354
Gm20219	3.88889	2.0318	0.0499287	0.139742	18	17	4	5	mmu:100504425	predicted gene, 20219	WT_Only	chr17	56563661	56564086	426	*	426	10.36	Intron (XM_006524157.2/Safb2, intron 18 of 20)	17	56551414	56554387	2974	2	Gm20219	NR_130128.1	-9274	XM_006524157.2;XM_006524159.2;XM_017317444.1;NM_001029979.2;XM_006524156.3;XR_001782070.1;XR_001782072.1;XR_001782071.1	Safb2;Safb2;Safb2;Safb2;Safb2;Safb2;Safb2;Safb2	0;0;0;0;0;0;0;0	10.36	7.05054	4.8066	2.98652
Smad9	3.95455	2.06572	0.00394772	0.017552	46	41	7	15	mmu:55994	Mothers against decapentaplegic homolog 9	WT_Only	chr3	54749682	54750050	369	*	369	8.04	3' UTR	3	54755455	54801662	46208	1	Smad9	XM_006501728.3	-5405	NM_025442.3	Alg5	0	8.04	4.84446	3.78147	1.45453
Phlda2	4.05556	2.0816	8.0876e-09	1.15662e-07	355	229	75	69	mmu:22113	Pleckstrin homology-like domain family A member 2	WT_Only	chr7	143524842	143526027	1186	*	1186	8.54	Intron (NM_001285490.1/Nap1l4, intron 10 of 14)	7	143501545	143503145	1601	2	Phlda2	XM_006508597.2	-21697	NM_001285490.1;XM_006508504.3;XM_006508505.3;NM_001285489.1;NM_008672.3;XM_006508508.3;XM_006508506.2;XM_006508507.2	Nap1l4;Nap1l4;Nap1l4;Nap1l4;Nap1l4;Nap1l4;Nap1l4;Nap1l4	0;0;0;0;0;0;0;0	8.54	5.12664	3.89573	1.6459
Plin4	4.92126	2.37198	1.16035e-13	2.87528e-12	333	292	55	72	mmu:57435	Perilipin-4	WT_Only	chr17	56101238	56101687	450	*	450	8.29	3' UTR	17	56100587	56108588	8002	2	Plin4	XM_011246550.2	6901	XM_006523707.3;XM_006523710.3;NM_001304784.1;NM_001304785.1;NM_008233.3;XM_006523708.2;XM_006523709.2;XM_011246550.2;XM_006524705.3;XM_011246546.2;XM_011246547.2;XM_011246548.2;XM_011246549.2;XM_011246552.2;NM_020568.3;XM_011246551.2;XM_017317591.1	Hdgfrp2;Hdgfrp2;Hdgfrp2;Hdgfrp2;Hdgfrp2;Hdgfrp2;Hdgfrp2;Plin4;Plin4;Plin4;Plin4;Plin4;Plin4;Plin4;Plin4;Plin4;Plin4	0;0;0;0;0;0;0;0;0;0;0;0;0;0;0;8266;8266	8.29	4.93016	3.80164	1.58569
Rhob	4.93464	2.36913	2.95506e-26	1.83357e-24	1661	1359	305	307	mmu:11852	Rho-related GTP-binding protein RhoB	WT_Only	chr12	8499211	8499531	321	*	321	8.46	Promoter (<=1kb)	12	8497758	8499985	2228	2	Rhob	NM_007483.2	454	NM_007483.2	Rhob	0	8.46	5.2762	4.00196	1.68622
Gm5486	5.35484	2.50481	3.54115e-05	0.000271235	60	106	12	19	mmu:433024	predicted gene 5486	WT_Only	chr16	49901374	49902644	1271	*	1271	8.81	Intron (XM_006521806.3/Cd47, intron 8 of 11)	16	49925912	49937014	11103	2	Gm5486	XR_001781911.1	34370	XM_006521806.3;XM_006521807.3;XM_006521808.3;XM_006521809.3;XM_006521810.3;XM_006521811.3;XR_384529.3;XR_384530.3;NM_010581.3	Cd47;Cd47;Cd47;Cd47;Cd47;Cd47;Cd47;Cd47;Cd47	0;0;0;0;0;0;0;0;0	8.81	5.57191	4.13958	1.89219
Csf1	5.36781	2.49209	2.42531e-33	2.00649e-31	7038	5469	1112	1218	mmu:12977	Macrophage colony-stimulating factor 1	WT_Only	chr3	107742523	107743428	906	*	906	9.28	3' UTR	3	107741048	107760469	19422	2	Csf1	NM_001113529.1	17041	NM_001113529.1;NM_007778.4;NM_001113530.1;XR_001783952.1	Csf1;Csf1;Csf1;Gm40121	0;0;0;0	9.28	5.62884	4.10277	2.02895
Adcy7	5.69466	2.58783	4.10434e-15	1.16958e-13	387	359	50	81	mmu:11513	Adenylate cyclase type 7	WT_Only	chr8	88248614	88248973	360	*	360	8.57	Intron (NM_001164497.1/Papd5, intron 6 of 12)	8	88272366	88329965	57600	1	Adcy7	XM_011248278.2	-23393	NM_001164497.1;NM_001164498.1;NM_001164499.1;XM_006530832.2;XM_006530830.3;XM_006530833.3;XM_017312651.1;XM_017312653.1	Papd5;Papd5;Papd5;Papd5;Papd5;Papd5;Papd5;Papd5	0;0;0;0;0;0;0;0	8.57	5.36591	4.04232	1.75246
Hmox1	5.77528	2.59804	1.25175e-37	1.25895e-35	5997	4797	891	978	mmu:15368	Heme oxygenase 1	WT_Only	chr8	75096915	75097318	404	*	404	8.61	Exon (NM_010442.2/Hmox1, exon 3 of 5)	8	75093618	75100593	6976	1	Hmox1	NM_010442.2	3297	NM_010442.2	Hmox1	0	8.61	5.40406	4.0594	1.78218
Tns2	5.84431	2.61443	8.91848e-30	6.32431e-28	1635	1293	242	259			WT_Only	chr15	102095592	102096944	1353	*	1353	10.77	3' UTR	15	102100373	102116401	16029	1	Tns2	XM_006520691.2	-3429	NM_145625.3;XM_006520691.2;XM_006520692.2	Eif4b;Tns2;Tns2	0;-3429;-3430	10.77	5.50457	3.81571	1.93737
Atp8b2	6.68017	2.80602	1.06781e-35	9.95843e-34	2702	2081	352	364	mmu:54667	Phospholipid-translocating ATPase	WT_Only	chr3	89946624	89949688	3065	*	3065	8.23	Exon (XM_006501714.3/Atp8b2, exon 13 of 27)	3	89939481	89960692	21212	2	Atp8b2	XM_006501714.3	11004	XM_006501714.3;NM_001081182.2;XM_006501715.2	Atp8b2;Atp8b2;Atp8b2	0;0;0	8.23	4.75866	3.70033	1.40906
Cpne9	6.8	2.82466	0.0172706	0.0600224	20	14	3	2	mmu:211232	Copine-9	WT_Only	chr6	113279378	113279941	564	*	564	8.75	Promoter (2-3kb)	6	113282268	113304828	22561	1	Cpne9	XM_006505851.3	-2327	XM_006505851.3;XM_006505852.3;XM_017321489.1;NM_170673.3;XM_006506824.3;XM_006506826.3;XR_001785185.1;XR_377503.3;XM_006506823.3;XM_006506827.3;NM_026849.2;XM_006506825.1	Cpne9;Cpne9;Cpne9;Cpne9;Mtmr14;Mtmr14;Mtmr14;Mtmr14;Mtmr14;Mtmr14;Mtmr14;Mtmr14	-2327;-2338;-2338;-2366;0;0;0;0;0;0;0;0	8.75	5.537	4.12862	1.85115
Cd68	7	2.87233	1.83156e-14	5.00605e-13	312	220	38	38	mmu:12514	Macrosialin	WT_Only	chr11	69666927	69669199	2273	*	2273	9.48	Promoter (<=1kb)	11	69664213	69666170	1958	2	Cd68	NR_110993.1	-757	NM_001291058.1;NR_110993.1;NM_001159375.1;NM_144958.4;NR_035455.1;NA;NA;NM_001301710.1;NM_001301711.1;NM_011900.4;NR_125917.1;NM_030702.4;NM_001163571.1;XM_006534530.2	Cd68;Cd68;Eif4a1;Eif4a1;Mir1934;Mir1934;Mir1934;Mpdu1;Mpdu1;Mpdu1;Mpdu1;Senp3;Senp3;Senp3	-757;-757;0;0;3884;3872;3835;-4278;-4278;-4278;-4278;0;0;0	9.48	6.24637	4.43775	2.41014
Ccdc109b	7.02632	2.87719	1.72971e-23	9.11831e-22	543	525	83	69	mmu:66815	Calcium uniporter regulatory subunit MCUb, mitochondrial	WT_Only	chr3	130006071	130007721	1651	*	1651	8.7	Exon (XM_006502467.3/Sec24b, exon 8 of 25)	3	129914960	129970214	55255	2	Ccdc109b	XM_006501901.3	-35857	XM_006502467.3;XM_006502469.3;XM_006502468.3;NM_207209.2	Sec24b;Sec24b;Sec24b;Sec24b	0;0;0;0	8.7	5.3293	3.99887	1.78293
Fam171b	7.58824	3.01554	3.08666e-05	0.000240008	54	75	4	13	mmu:241520	Protein FAM171B	WT_Only	chr2	83785501	83786420	920	*	920	9.02	Intron (XM_006498807.3/Itgav, intron 17 of 29)	2	83812563	83883486	70924	1	Fam171b	XM_006499465.2	-26143	XM_006498807.3;NM_008402.3	Itgav;Itgav	0;0	9.02	5.24225	3.89527	1.76547
Fn1	13.8493	3.86282	1.65687e-80	7.28453e-78	161955	127467	9413	11485	mmu:14268	Fibronectin	WT_Only	chr1	71636835	71637525	691	*	691	8	Exon (NM_001276408.1/Fn1, exon 12 of 45)	1	71585519	71653229	67711	2	Fn1	XM_006495697.3	15704	NM_001276408.1;NM_001276409.1;NM_001276410.1;NM_001276411.1;NM_001276412.1;NM_001276413.1;NM_010233.2;XM_006495697.3;XM_006495699.3;XM_006495700.3;XM_017315775.1;XM_017315837.1;XM_017315848.1	Fn1;Fn1;Fn1;Fn1;Fn1;Fn1;Fn1;Fn1;Fn1;Fn1;Fn1;Fn1;Fn1	0;0;0;0;0;0;0;0;0;0;0;0;0	8	4.82617	3.77472	1.43525
1700019B03Rik	20	4.3806	0.0279586	0.0887067	10	10	1	0	mmu:76406	MCG11564	WT_Only	chr8	3452113	3453544	1432	*	1432	8.28	Exon (XM_006508682.2/Arhgef18, exon 17 of 20)	8	3465978	3487183	21206	1	1700019B03Rik	XM_017313004.1	-12434	XM_006508682.2;NM_133962.3;XM_017312501.1;XM_006508681.2;XM_006508865.3;XM_006508866.3	Arhgef18;Arhgef18;Arhgef18;Arhgef18;Pex11g;Pex11g	0;0;0;0;14083;14290	8.28	5.0475	3.87908	1.58535
Bdh2	20.2667	4.41302	1.05267e-15	3.1576e-14	165	139	6	9	mmu:69772	3-hydroxybutyrate dehydrogenase type 2	WT_Only	chr3	135263317	135264578	1262	*	1262	8.73	Exon (XM_017319565.1/Cenpe, exon 42 of 46)	3	135281221	135304426	23206	1	Bdh2	NM_001172055.1	-16643	XM_017319565.1;NM_173762.4	Cenpe;Cenpe	0;0	8.73	5.18507	3.9027	1.67177
Gm5421	21.2857	4.47562	7.28311e-09	1.05035e-07	85	64	4	3		aconitase 2, mitochondrial pseudogene	WT_Only	chr10	22343478	22345454	1977	*	1977	11.41	Promoter (<=1kb)	10	22343410	22346146	2737	1	Gm5421	Gm5421	68	Gm5421	Gm5421	0	11.41	8.07521	5.21241	3.8976
Tg	23	4.5888	0.0230343	0.0758219	18	5	0	1	mmu:21819	Kidney thyroglobulin variant	WT_Only	chr15	66631866	66633116	1251	*	1251	8	Exon (XR_001781526.1/Phf20l1, exon 17 of 20)	15	66670754	66850721	179968	1	Tg	XM_006520745.3	-37638	XR_001781526.1;XM_006520916.3;XM_006520917.3;XM_006520919.3;XR_001781524.1;XR_001781525.1;XR_001781527.1;XR_001781528.1;XR_001781529.1;XR_001781530.1;XR_001781531.1;XR_001781532.1;XR_001781533.1;XM_006520918.3;XM_006520920.3;XM_006520921.3;XM_017316601.1;NM_001081409.1	Phf20l1;Phf20l1;Phf20l1;Phf20l1;Phf20l1;Phf20l1;Phf20l1;Phf20l1;Phf20l1;Phf20l1;Phf20l1;Phf20l1;Phf20l1;Phf20l1;Phf20l1;Phf20l1;Phf20l1;Phf20l1	0;0;0;0;0;0;0;0;0;0;0;0;0;0;0;0;0;0	8	4.82619	3.77477	1.41491
Klhl38	#DIV/0!	6.20728	0.00179469	0.00887132	16	10	0	0	mmu:268807	Kelch-like protein 38	WT_Only	chr15	58347173	58347485	313	*	313	9.56	Intron (NM_027211.2/Anxa13, intron 6 of 7)	15	58314573	58324169	9597	2	Klhl38	NM_177755.3	-23004	NM_027211.2	Anxa13	0	9.56	5.48536	3.97813	1.9237
Krt87	#DIV/0!	6.20389	0.00206705	0.0100151	18	8	0	0			WT_Only	chr15	101426209	101427474	1266	*	1266	8	Exon (NM_033073.3/Krt7, exon 8 of 9)	15	101431490	101438804	7315	2	Krt87	NM_001003668.2	11330	NM_033073.3;NM_001003668.2	Krt7;Krt87	0;11330	8	4.87933	3.80923	1.43525
